# Supplementary material for: Transcriptomic dynamics changes related to anthocyanin accumulation in the fleshy roots of carmine radish (Raphanus sativus L.) characterized using RNA-Seq
Source: PeerJ journal article supplement (doi:10.7717/peerj.10978), 2021-04-07
Supplement: gene2Kegg.mapping.xls.zip [file gene2Kegg.mapping.xls]

Cluster_10013	K16222	Organismal Systems	Environmental adaptation	04712 Circadian rhythm - plant
Cluster_10064	K12126	Organismal Systems	Environmental adaptation	04712 Circadian rhythm - plant
Cluster_101239	"K02259,K09422,K16166"	Organismal Systems	Environmental adaptation	04712 Circadian rhythm - plant
Cluster_101257	"K12131,K14491,K12130,K12129"	Organismal Systems	Environmental adaptation	04712 Circadian rhythm - plant
Cluster_10352	K12126	Organismal Systems	Environmental adaptation	04712 Circadian rhythm - plant
Cluster_10387	"K12130,K12128"	Organismal Systems	Environmental adaptation	04712 Circadian rhythm - plant
Cluster_10568	"K13035,K16221"	Organismal Systems	Environmental adaptation	04712 Circadian rhythm - plant
Cluster_10586	"K12134,K12133"	Organismal Systems	Environmental adaptation	04712 Circadian rhythm - plant
Cluster_10751	"K13035,K16221"	Organismal Systems	Environmental adaptation	04712 Circadian rhythm - plant
Cluster_11059	"K02259,K16166,K09422"	Organismal Systems	Environmental adaptation	04712 Circadian rhythm - plant
Cluster_11065	"K08269,K13412,K14758,K03097,K04688,K07198,K06276"	Organismal Systems	Environmental adaptation	04712 Circadian rhythm - plant
Cluster_11080	"K14512,K03097,K04371"	Organismal Systems	Environmental adaptation	04712 Circadian rhythm - plant
Cluster_111129	K16241	Organismal Systems	Environmental adaptation	04712 Circadian rhythm - plant
Cluster_111884	K00660	Organismal Systems	Environmental adaptation	04712 Circadian rhythm - plant
Cluster_11193	"K03097,K14758,K13412,K06276,K04688"	Organismal Systems	Environmental adaptation	04712 Circadian rhythm - plant
Cluster_11203	K12126	Organismal Systems	Environmental adaptation	04712 Circadian rhythm - plant
Cluster_113096	K03115	Organismal Systems	Environmental adaptation	04712 Circadian rhythm - plant
Cluster_1131	K12127	Organismal Systems	Environmental adaptation	04712 Circadian rhythm - plant
Cluster_113551	"K16166,K02259,K09422"	Organismal Systems	Environmental adaptation	04712 Circadian rhythm - plant
Cluster_11363	"K02259,K16166,K09422"	Organismal Systems	Environmental adaptation	04712 Circadian rhythm - plant
Cluster_11386	K12126	Organismal Systems	Environmental adaptation	04712 Circadian rhythm - plant
Cluster_114572	"K12121,K12120"	Organismal Systems	Environmental adaptation	04712 Circadian rhythm - plant
Cluster_11538	"K16166,K02259,K09422"	Organismal Systems	Environmental adaptation	04712 Circadian rhythm - plant
Cluster_115506	K16221	Organismal Systems	Environmental adaptation	04712 Circadian rhythm - plant
Cluster_11578	"K12126,K16189"	Organismal Systems	Environmental adaptation	04712 Circadian rhythm - plant
Cluster_11635	"K12130,K19720,K12127,K12129,K03539,K12135"	Organismal Systems	Environmental adaptation	04712 Circadian rhythm - plant
Cluster_116423	K16221	Organismal Systems	Environmental adaptation	04712 Circadian rhythm - plant
Cluster_11668	"K12127,K12874,K03165"	Organismal Systems	Environmental adaptation	04712 Circadian rhythm - plant
Cluster_11807	"K16166,K02259,K09422"	Organismal Systems	Environmental adaptation	04712 Circadian rhythm - plant
Cluster_11853	K16222	Organismal Systems	Environmental adaptation	04712 Circadian rhythm - plant
Cluster_11992	"K10143,K10615"	Organismal Systems	Environmental adaptation	04712 Circadian rhythm - plant
Cluster_11993	K16222	Organismal Systems	Environmental adaptation	04712 Circadian rhythm - plant
Cluster_12138	"K19720,K12130,K12128,K12129,K12127,K12135"	Organismal Systems	Environmental adaptation	04712 Circadian rhythm - plant
Cluster_12215	"K12126,K16189"	Organismal Systems	Environmental adaptation	04712 Circadian rhythm - plant
Cluster_12225	"K12129,K12130,K19720,K12135"	Organismal Systems	Environmental adaptation	04712 Circadian rhythm - plant
Cluster_12228	K16222	Organismal Systems	Environmental adaptation	04712 Circadian rhythm - plant
Cluster_12241	"K19720,K12130,K03539,K12127,K12129,K12135"	Organismal Systems	Environmental adaptation	04712 Circadian rhythm - plant
Cluster_12308	"K12127,K12129,K03539,K12130,K19720,K12135"	Organismal Systems	Environmental adaptation	04712 Circadian rhythm - plant
Cluster_12355	K03097	Organismal Systems	Environmental adaptation	04712 Circadian rhythm - plant
Cluster_12406	"K03083,K04688,K07198,K03097,K02202,K08269,K13412"	Organismal Systems	Environmental adaptation	04712 Circadian rhythm - plant
Cluster_12449	"K09422,K02259,K16166"	Organismal Systems	Environmental adaptation	04712 Circadian rhythm - plant
Cluster_1250	K16240	Organismal Systems	Environmental adaptation	04712 Circadian rhythm - plant
Cluster_12522	"K12134,K12133"	Organismal Systems	Environmental adaptation	04712 Circadian rhythm - plant
Cluster_12526	"K09422,K02259,K16166"	Organismal Systems	Environmental adaptation	04712 Circadian rhythm - plant
Cluster_12766	"K12119,K12118"	Organismal Systems	Environmental adaptation	04712 Circadian rhythm - plant
Cluster_13064	"K10615,K10143"	Organismal Systems	Environmental adaptation	04712 Circadian rhythm - plant
Cluster_13073	"K12134,K12133"	Organismal Systems	Environmental adaptation	04712 Circadian rhythm - plant
Cluster_13220	"K12135,K03539,K12127,K12129,K19720"	Organismal Systems	Environmental adaptation	04712 Circadian rhythm - plant
Cluster_13365	K16222	Organismal Systems	Environmental adaptation	04712 Circadian rhythm - plant
Cluster_13506	K12126	Organismal Systems	Environmental adaptation	04712 Circadian rhythm - plant
Cluster_13614	"K12134,K12133"	Organismal Systems	Environmental adaptation	04712 Circadian rhythm - plant
Cluster_13724	"K12129,K19720,K12135"	Organismal Systems	Environmental adaptation	04712 Circadian rhythm - plant
Cluster_13734	"K16166,K02259,K09422"	Organismal Systems	Environmental adaptation	04712 Circadian rhythm - plant
Cluster_13905	"K12119,K12118"	Organismal Systems	Environmental adaptation	04712 Circadian rhythm - plant
Cluster_13976	"K12129,K12127,K03539,K19720,K12130,K12135"	Organismal Systems	Environmental adaptation	04712 Circadian rhythm - plant
Cluster_14041	K10143	Organismal Systems	Environmental adaptation	04712 Circadian rhythm - plant
Cluster_14146	K16222	Organismal Systems	Environmental adaptation	04712 Circadian rhythm - plant
Cluster_14164	"K03539,K12129"	Organismal Systems	Environmental adaptation	04712 Circadian rhythm - plant
Cluster_14360	"K12129,K12128,K12127,K12130"	Organismal Systems	Environmental adaptation	04712 Circadian rhythm - plant
Cluster_14437	K16222	Organismal Systems	Environmental adaptation	04712 Circadian rhythm - plant
Cluster_14510	K16222	Organismal Systems	Environmental adaptation	04712 Circadian rhythm - plant
Cluster_14540	"K12135,K19720,K12130,K12129,K12127,K03539"	Organismal Systems	Environmental adaptation	04712 Circadian rhythm - plant
Cluster_14627	"K02259,K16166,K09422"	Organismal Systems	Environmental adaptation	04712 Circadian rhythm - plant
Cluster_14970	K12127	Organismal Systems	Environmental adaptation	04712 Circadian rhythm - plant
Cluster_14992	"K09422,K02259,K16166"	Organismal Systems	Environmental adaptation	04712 Circadian rhythm - plant
Cluster_15057	"K16166,K02259,K09422"	Organismal Systems	Environmental adaptation	04712 Circadian rhythm - plant
Cluster_15141	"K13035,K16221"	Organismal Systems	Environmental adaptation	04712 Circadian rhythm - plant
Cluster_15188	K16222	Organismal Systems	Environmental adaptation	04712 Circadian rhythm - plant
Cluster_15266	"K10615,K10143"	Organismal Systems	Environmental adaptation	04712 Circadian rhythm - plant
Cluster_15327	"K12134,K12133"	Organismal Systems	Environmental adaptation	04712 Circadian rhythm - plant
Cluster_15461	K16222	Organismal Systems	Environmental adaptation	04712 Circadian rhythm - plant
Cluster_1553	"K10143,K13341,K01835,K13506"	Organismal Systems	Environmental adaptation	04712 Circadian rhythm - plant
Cluster_15584	"K03539,K12129"	Organismal Systems	Environmental adaptation	04712 Circadian rhythm - plant
Cluster_15658	K12126	Organismal Systems	Environmental adaptation	04712 Circadian rhythm - plant
Cluster_15692	"K12135,K19720"	Organismal Systems	Environmental adaptation	04712 Circadian rhythm - plant
Cluster_15708	K12126	Organismal Systems	Environmental adaptation	04712 Circadian rhythm - plant
Cluster_15748	K03097	Organismal Systems	Environmental adaptation	04712 Circadian rhythm - plant
Cluster_16044	"K12133,K01184"	Organismal Systems	Environmental adaptation	04712 Circadian rhythm - plant
Cluster_16113	K12126	Organismal Systems	Environmental adaptation	04712 Circadian rhythm - plant
Cluster_16130	"K12126,K16189"	Organismal Systems	Environmental adaptation	04712 Circadian rhythm - plant
Cluster_16150	"K16221,K13035"	Organismal Systems	Environmental adaptation	04712 Circadian rhythm - plant
Cluster_16285	K12126	Organismal Systems	Environmental adaptation	04712 Circadian rhythm - plant
Cluster_16336	K03115	Organismal Systems	Environmental adaptation	04712 Circadian rhythm - plant
Cluster_16338	"K02259,K16166,K09422"	Organismal Systems	Environmental adaptation	04712 Circadian rhythm - plant
Cluster_16604	"K12135,K12130,K12128,K12129,K12127"	Organismal Systems	Environmental adaptation	04712 Circadian rhythm - plant
Cluster_16637	"K12135,K12127,K12129"	Organismal Systems	Environmental adaptation	04712 Circadian rhythm - plant
Cluster_16644	"K16166,K02259,K09422"	Organismal Systems	Environmental adaptation	04712 Circadian rhythm - plant
Cluster_16688	"K16166,K02259,K09584,K09422"	Organismal Systems	Environmental adaptation	04712 Circadian rhythm - plant
Cluster_16740	"K12135,K19720,K12130,K12127,K12129,K03539"	Organismal Systems	Environmental adaptation	04712 Circadian rhythm - plant
Cluster_16743	"K16189,K12126"	Organismal Systems	Environmental adaptation	04712 Circadian rhythm - plant
Cluster_16775	K03115	Organismal Systems	Environmental adaptation	04712 Circadian rhythm - plant
Cluster_17110	"K12130,K19720,K12129,K12127,K12135"	Organismal Systems	Environmental adaptation	04712 Circadian rhythm - plant
Cluster_17141	"K12135,K19720"	Organismal Systems	Environmental adaptation	04712 Circadian rhythm - plant
Cluster_17168	"K12126,K16189"	Organismal Systems	Environmental adaptation	04712 Circadian rhythm - plant
Cluster_17315	K12126	Organismal Systems	Environmental adaptation	04712 Circadian rhythm - plant
Cluster_17432	"K12134,K12133"	Organismal Systems	Environmental adaptation	04712 Circadian rhythm - plant
Cluster_17446	"K08269,K04371,K13414,K03097,K06276"	Organismal Systems	Environmental adaptation	04712 Circadian rhythm - plant
Cluster_17601	"K12129,K12127,K12135"	Organismal Systems	Environmental adaptation	04712 Circadian rhythm - plant
Cluster_17823	"K12135,K19720"	Organismal Systems	Environmental adaptation	04712 Circadian rhythm - plant
Cluster_17913	"K09422,K02259,K16166"	Organismal Systems	Environmental adaptation	04712 Circadian rhythm - plant
Cluster_18139	"K09422,K16166,K02259"	Organismal Systems	Environmental adaptation	04712 Circadian rhythm - plant
Cluster_18223	"K01184,K12133"	Organismal Systems	Environmental adaptation	04712 Circadian rhythm - plant
Cluster_18237	"K09422,K16166,K12860,K02259"	Organismal Systems	Environmental adaptation	04712 Circadian rhythm - plant
Cluster_18276	"K19720,K12135"	Organismal Systems	Environmental adaptation	04712 Circadian rhythm - plant
Cluster_1834	"K12116,K12115"	Organismal Systems	Environmental adaptation	04712 Circadian rhythm - plant
Cluster_18371	K12126	Organismal Systems	Environmental adaptation	04712 Circadian rhythm - plant
Cluster_18432	K03097	Organismal Systems	Environmental adaptation	04712 Circadian rhythm - plant
Cluster_18554	"K09422,K16166,K02259"	Organismal Systems	Environmental adaptation	04712 Circadian rhythm - plant
Cluster_18606	"K13035,K16221"	Organismal Systems	Environmental adaptation	04712 Circadian rhythm - plant
Cluster_18653	"K12126,K16189"	Organismal Systems	Environmental adaptation	04712 Circadian rhythm - plant
Cluster_18660	"K16241,K14546"	Organismal Systems	Environmental adaptation	04712 Circadian rhythm - plant
Cluster_18720	"K14005,K01895,K13341,K10143"	Organismal Systems	Environmental adaptation	04712 Circadian rhythm - plant
Cluster_18737	"K16166,K02259,K09422"	Organismal Systems	Environmental adaptation	04712 Circadian rhythm - plant
Cluster_18950	K16222	Organismal Systems	Environmental adaptation	04712 Circadian rhythm - plant
Cluster_1912	"K12115,K12116"	Organismal Systems	Environmental adaptation	04712 Circadian rhythm - plant
Cluster_19223	"K09422,K16166,K02259"	Organismal Systems	Environmental adaptation	04712 Circadian rhythm - plant
Cluster_1931	"K10143,K10615"	Organismal Systems	Environmental adaptation	04712 Circadian rhythm - plant
Cluster_19577	K12126	Organismal Systems	Environmental adaptation	04712 Circadian rhythm - plant
Cluster_19725	"K09422,K16166,K02259"	Organismal Systems	Environmental adaptation	04712 Circadian rhythm - plant
Cluster_19748	"K12135,K12129"	Organismal Systems	Environmental adaptation	04712 Circadian rhythm - plant
Cluster_20096	"K02259,K16166,K09422"	Organismal Systems	Environmental adaptation	04712 Circadian rhythm - plant
Cluster_20238	"K10143,K10615"	Organismal Systems	Environmental adaptation	04712 Circadian rhythm - plant
Cluster_20341	"K02259,K16166,K09422"	Organismal Systems	Environmental adaptation	04712 Circadian rhythm - plant
Cluster_20411	K03097	Organismal Systems	Environmental adaptation	04712 Circadian rhythm - plant
Cluster_2066	"K14512,K07198,K02918,K03097,K02202,K13412,K04371"	Organismal Systems	Environmental adaptation	04712 Circadian rhythm - plant
Cluster_21007	"K09422,K16166,K02259"	Organismal Systems	Environmental adaptation	04712 Circadian rhythm - plant
Cluster_21103	"K09422,K16166,K02259"	Organismal Systems	Environmental adaptation	04712 Circadian rhythm - plant
Cluster_21280	"K02259,K16166,K09422"	Organismal Systems	Environmental adaptation	04712 Circadian rhythm - plant
Cluster_21449	K03115	Organismal Systems	Environmental adaptation	04712 Circadian rhythm - plant
Cluster_21451	"K19720,K12135"	Organismal Systems	Environmental adaptation	04712 Circadian rhythm - plant
Cluster_21740	K12126	Organismal Systems	Environmental adaptation	04712 Circadian rhythm - plant
Cluster_21937	K12126	Organismal Systems	Environmental adaptation	04712 Circadian rhythm - plant
Cluster_2197	"K16241,K03248"	Organismal Systems	Environmental adaptation	04712 Circadian rhythm - plant
Cluster_220	"K12874,K12127,K03165"	Organismal Systems	Environmental adaptation	04712 Circadian rhythm - plant
Cluster_22465	"K12134,K12133"	Organismal Systems	Environmental adaptation	04712 Circadian rhythm - plant
Cluster_22475	K12135	Organismal Systems	Environmental adaptation	04712 Circadian rhythm - plant
Cluster_22765	K16221	Organismal Systems	Environmental adaptation	04712 Circadian rhythm - plant
Cluster_22777	K16241	Organismal Systems	Environmental adaptation	04712 Circadian rhythm - plant
Cluster_22967	"K02259,K16166,K09422,K12598"	Organismal Systems	Environmental adaptation	04712 Circadian rhythm - plant
Cluster_23094	K12135	Organismal Systems	Environmental adaptation	04712 Circadian rhythm - plant
Cluster_23121	"K12130,K12131,K12129,K12128"	Organismal Systems	Environmental adaptation	04712 Circadian rhythm - plant
Cluster_2326	"K12134,K12133"	Organismal Systems	Environmental adaptation	04712 Circadian rhythm - plant
Cluster_23278	K16221	Organismal Systems	Environmental adaptation	04712 Circadian rhythm - plant
Cluster_2333	"K12118,K12119,K02183"	Organismal Systems	Environmental adaptation	04712 Circadian rhythm - plant
Cluster_23679	"K16166,K02259,K09422"	Organismal Systems	Environmental adaptation	04712 Circadian rhythm - plant
Cluster_23685	"K09422,K02259,K16166"	Organismal Systems	Environmental adaptation	04712 Circadian rhythm - plant
Cluster_2379	"K12133,K12134"	Organismal Systems	Environmental adaptation	04712 Circadian rhythm - plant
Cluster_23883	K16222	Organismal Systems	Environmental adaptation	04712 Circadian rhythm - plant
Cluster_23990	K12135	Organismal Systems	Environmental adaptation	04712 Circadian rhythm - plant
Cluster_24197	"K12129,K12127"	Organismal Systems	Environmental adaptation	04712 Circadian rhythm - plant
Cluster_24301	"K16166,K02259,K09422"	Organismal Systems	Environmental adaptation	04712 Circadian rhythm - plant
Cluster_24324	K12126	Organismal Systems	Environmental adaptation	04712 Circadian rhythm - plant
Cluster_24661	K12126	Organismal Systems	Environmental adaptation	04712 Circadian rhythm - plant
Cluster_24811	"K16166,K02259,K14317,K09422"	Organismal Systems	Environmental adaptation	04712 Circadian rhythm - plant
Cluster_2482	"K16241,K03248"	Organismal Systems	Environmental adaptation	04712 Circadian rhythm - plant
Cluster_25403	"K16166,K12860,K02259,K09422"	Organismal Systems	Environmental adaptation	04712 Circadian rhythm - plant
Cluster_25405	"K16166,K02259,K12598,K09422"	Organismal Systems	Environmental adaptation	04712 Circadian rhythm - plant
Cluster_2546	"K10260,K15542,K14555,K14018,K03130,K10143,K12662,K14549,K17890"	Organismal Systems	Environmental adaptation	04712 Circadian rhythm - plant
Cluster_25538	"K19720,K12135"	Organismal Systems	Environmental adaptation	04712 Circadian rhythm - plant
Cluster_25701	"K09422,K02259,K16166"	Organismal Systems	Environmental adaptation	04712 Circadian rhythm - plant
Cluster_25892	K16241	Organismal Systems	Environmental adaptation	04712 Circadian rhythm - plant
Cluster_26124	"K19720,K12135"	Organismal Systems	Environmental adaptation	04712 Circadian rhythm - plant
Cluster_26156	K12125	Organismal Systems	Environmental adaptation	04712 Circadian rhythm - plant
Cluster_26207	"K16166,K02259,K09422"	Organismal Systems	Environmental adaptation	04712 Circadian rhythm - plant
Cluster_26489	"K16166,K02259,K12860,K09422"	Organismal Systems	Environmental adaptation	04712 Circadian rhythm - plant
Cluster_26581	K12119	Organismal Systems	Environmental adaptation	04712 Circadian rhythm - plant
Cluster_26779	K12126	Organismal Systems	Environmental adaptation	04712 Circadian rhythm - plant
Cluster_27070	K00660	Organismal Systems	Environmental adaptation	04712 Circadian rhythm - plant
Cluster_2719	"K13341,K16240,K14558"	Organismal Systems	Environmental adaptation	04712 Circadian rhythm - plant
Cluster_27198	"K09422,K16166,K02259"	Organismal Systems	Environmental adaptation	04712 Circadian rhythm - plant
Cluster_2723	"K12126,K16189"	Organismal Systems	Environmental adaptation	04712 Circadian rhythm - plant
Cluster_27274	"K12126,K13422,K16189"	Organismal Systems	Environmental adaptation	04712 Circadian rhythm - plant
Cluster_27519	"K12598,K09422,K16166,K02259"	Organismal Systems	Environmental adaptation	04712 Circadian rhythm - plant
Cluster_27535	"K12130,K12131,K12128,K12129"	Organismal Systems	Environmental adaptation	04712 Circadian rhythm - plant
Cluster_2754	"K19720,K12135"	Organismal Systems	Environmental adaptation	04712 Circadian rhythm - plant
Cluster_2762	K10143	Organismal Systems	Environmental adaptation	04712 Circadian rhythm - plant
Cluster_2775	"K15542,K14555,K12857,K10143,K03130,K17890,K14549"	Organismal Systems	Environmental adaptation	04712 Circadian rhythm - plant
Cluster_28171	K12126	Organismal Systems	Environmental adaptation	04712 Circadian rhythm - plant
Cluster_28352	"K12127,K12135"	Organismal Systems	Environmental adaptation	04712 Circadian rhythm - plant
Cluster_28373	"K09422,K16166,K02259"	Organismal Systems	Environmental adaptation	04712 Circadian rhythm - plant
Cluster_28467	"K16189,K12126,K13422"	Organismal Systems	Environmental adaptation	04712 Circadian rhythm - plant
Cluster_2854	K10143	Organismal Systems	Environmental adaptation	04712 Circadian rhythm - plant
Cluster_28566	K16222	Organismal Systems	Environmental adaptation	04712 Circadian rhythm - plant
Cluster_2887	K12129	Organismal Systems	Environmental adaptation	04712 Circadian rhythm - plant
Cluster_28895	"K10666,K10143"	Organismal Systems	Environmental adaptation	04712 Circadian rhythm - plant
Cluster_29035	"K12126,K16189"	Organismal Systems	Environmental adaptation	04712 Circadian rhythm - plant
Cluster_29200	K00660	Organismal Systems	Environmental adaptation	04712 Circadian rhythm - plant
Cluster_29446	K03097	Organismal Systems	Environmental adaptation	04712 Circadian rhythm - plant
Cluster_29506	K16241	Organismal Systems	Environmental adaptation	04712 Circadian rhythm - plant
Cluster_2955	K12126	Organismal Systems	Environmental adaptation	04712 Circadian rhythm - plant
Cluster_29601	"K13035,K16221"	Organismal Systems	Environmental adaptation	04712 Circadian rhythm - plant
Cluster_29642	K16223	Organismal Systems	Environmental adaptation	04712 Circadian rhythm - plant
Cluster_2994	K16166	Organismal Systems	Environmental adaptation	04712 Circadian rhythm - plant
Cluster_30021	"K12134,K12133"	Organismal Systems	Environmental adaptation	04712 Circadian rhythm - plant
Cluster_30105	K12135	Organismal Systems	Environmental adaptation	04712 Circadian rhythm - plant
Cluster_30444	"K12130,K12128"	Organismal Systems	Environmental adaptation	04712 Circadian rhythm - plant
Cluster_30515	"K16189,K12126"	Organismal Systems	Environmental adaptation	04712 Circadian rhythm - plant
Cluster_30526	K03115	Organismal Systems	Environmental adaptation	04712 Circadian rhythm - plant
Cluster_30625	K12130	Organismal Systems	Environmental adaptation	04712 Circadian rhythm - plant
Cluster_3079	K03115	Organismal Systems	Environmental adaptation	04712 Circadian rhythm - plant
Cluster_30892	K16222	Organismal Systems	Environmental adaptation	04712 Circadian rhythm - plant
Cluster_31072	"K16221,K13035"	Organismal Systems	Environmental adaptation	04712 Circadian rhythm - plant
Cluster_31504	K12135	Organismal Systems	Environmental adaptation	04712 Circadian rhythm - plant
Cluster_318	"K12591,K12120"	Organismal Systems	Environmental adaptation	04712 Circadian rhythm - plant
Cluster_3189	"K16189,K12126"	Organismal Systems	Environmental adaptation	04712 Circadian rhythm - plant
Cluster_3208	"K12116,K12115"	Organismal Systems	Environmental adaptation	04712 Circadian rhythm - plant
Cluster_32223	"K12126,K00826"	Organismal Systems	Environmental adaptation	04712 Circadian rhythm - plant
Cluster_32426	K12126	Organismal Systems	Environmental adaptation	04712 Circadian rhythm - plant
Cluster_32513	K16222	Organismal Systems	Environmental adaptation	04712 Circadian rhythm - plant
Cluster_32752	"K12118,K12119"	Organismal Systems	Environmental adaptation	04712 Circadian rhythm - plant
Cluster_3317	K12118	Organismal Systems	Environmental adaptation	04712 Circadian rhythm - plant
Cluster_33391	K16222	Organismal Systems	Environmental adaptation	04712 Circadian rhythm - plant
Cluster_33423	"K19720,K12135"	Organismal Systems	Environmental adaptation	04712 Circadian rhythm - plant
Cluster_3344	"K14514,K12857,K14555,K10260,K14406,K12662,K10143,K03130,K12816"	Organismal Systems	Environmental adaptation	04712 Circadian rhythm - plant
Cluster_3363	K12126	Organismal Systems	Environmental adaptation	04712 Circadian rhythm - plant
Cluster_33868	K12119	Organismal Systems	Environmental adaptation	04712 Circadian rhythm - plant
Cluster_340	"K16240,K00771,K10143"	Organismal Systems	Environmental adaptation	04712 Circadian rhythm - plant
Cluster_3412	"K12133,K12134"	Organismal Systems	Environmental adaptation	04712 Circadian rhythm - plant
Cluster_35100	K16222	Organismal Systems	Environmental adaptation	04712 Circadian rhythm - plant
Cluster_3547	K12126	Organismal Systems	Environmental adaptation	04712 Circadian rhythm - plant
Cluster_359	"K10143,K00771,K16240"	Organismal Systems	Environmental adaptation	04712 Circadian rhythm - plant
Cluster_35915	K16241	Organismal Systems	Environmental adaptation	04712 Circadian rhythm - plant
Cluster_36148	K12129	Organismal Systems	Environmental adaptation	04712 Circadian rhythm - plant
Cluster_3634	K16222	Organismal Systems	Environmental adaptation	04712 Circadian rhythm - plant
Cluster_36358	"K09422,K16166,K02259"	Organismal Systems	Environmental adaptation	04712 Circadian rhythm - plant
Cluster_3657	"K19720,K12130,K12129,K12127,K03539,K12135"	Organismal Systems	Environmental adaptation	04712 Circadian rhythm - plant
Cluster_36688	"K07198,K04688,K03097,K14758,K13412"	Organismal Systems	Environmental adaptation	04712 Circadian rhythm - plant
Cluster_3736	K12129	Organismal Systems	Environmental adaptation	04712 Circadian rhythm - plant
Cluster_3750	"K12130,K19720,K03539,K12129,K12127,K12135"	Organismal Systems	Environmental adaptation	04712 Circadian rhythm - plant
Cluster_37691	"K09422,K16166,K02259"	Organismal Systems	Environmental adaptation	04712 Circadian rhythm - plant
Cluster_3773	K12126	Organismal Systems	Environmental adaptation	04712 Circadian rhythm - plant
Cluster_3774	K12133	Organismal Systems	Environmental adaptation	04712 Circadian rhythm - plant
Cluster_37764	K16222	Organismal Systems	Environmental adaptation	04712 Circadian rhythm - plant
Cluster_37975	K03115	Organismal Systems	Environmental adaptation	04712 Circadian rhythm - plant
Cluster_38482	K16166	Organismal Systems	Environmental adaptation	04712 Circadian rhythm - plant
Cluster_38756	"K09422,K02259,K16166"	Organismal Systems	Environmental adaptation	04712 Circadian rhythm - plant
Cluster_39154	"K12135,K12130,K12127,K12129"	Organismal Systems	Environmental adaptation	04712 Circadian rhythm - plant
Cluster_3920	"K12857,K14555,K10599,K12662,K17890,K10143,K03130,K12602"	Organismal Systems	Environmental adaptation	04712 Circadian rhythm - plant
Cluster_39833	K00660	Organismal Systems	Environmental adaptation	04712 Circadian rhythm - plant
Cluster_40071	"K14509,K12129,K14491,K14489"	Organismal Systems	Environmental adaptation	04712 Circadian rhythm - plant
Cluster_40135	"K16166,K02259,K09422"	Organismal Systems	Environmental adaptation	04712 Circadian rhythm - plant
Cluster_40837	K12127	Organismal Systems	Environmental adaptation	04712 Circadian rhythm - plant
Cluster_41196	"K02259,K16166,K09422,K12598"	Organismal Systems	Environmental adaptation	04712 Circadian rhythm - plant
Cluster_4127	K03115	Organismal Systems	Environmental adaptation	04712 Circadian rhythm - plant
Cluster_4128	"K03248,K16241"	Organismal Systems	Environmental adaptation	04712 Circadian rhythm - plant
Cluster_41667	"K16221,K13035"	Organismal Systems	Environmental adaptation	04712 Circadian rhythm - plant
Cluster_41779	K16222	Organismal Systems	Environmental adaptation	04712 Circadian rhythm - plant
Cluster_42084	"K12127,K12129,K12128,K12130"	Organismal Systems	Environmental adaptation	04712 Circadian rhythm - plant
Cluster_4223	K03115	Organismal Systems	Environmental adaptation	04712 Circadian rhythm - plant
Cluster_4225	"K10615,K10143"	Organismal Systems	Environmental adaptation	04712 Circadian rhythm - plant
Cluster_42253	K16241	Organismal Systems	Environmental adaptation	04712 Circadian rhythm - plant
Cluster_42697	"K10615,K10143"	Organismal Systems	Environmental adaptation	04712 Circadian rhythm - plant
Cluster_4287	"K12816,K14018,K10143,K12662,K13341,K12602,K15542,K12857,K03246"	Organismal Systems	Environmental adaptation	04712 Circadian rhythm - plant
Cluster_43205	"K09422,K02259,K16166"	Organismal Systems	Environmental adaptation	04712 Circadian rhythm - plant
Cluster_4362	K10143	Organismal Systems	Environmental adaptation	04712 Circadian rhythm - plant
Cluster_43711	"K12128,K12129,K12130"	Organismal Systems	Environmental adaptation	04712 Circadian rhythm - plant
Cluster_4378	"K16241,K03248"	Organismal Systems	Environmental adaptation	04712 Circadian rhythm - plant
Cluster_43879	"K16189,K12126"	Organismal Systems	Environmental adaptation	04712 Circadian rhythm - plant
Cluster_4411	K12126	Organismal Systems	Environmental adaptation	04712 Circadian rhythm - plant
Cluster_4414	K12125	Organismal Systems	Environmental adaptation	04712 Circadian rhythm - plant
Cluster_4475	"K12135,K12160"	Organismal Systems	Environmental adaptation	04712 Circadian rhythm - plant
Cluster_4536	"K12116,K12115"	Organismal Systems	Environmental adaptation	04712 Circadian rhythm - plant
Cluster_45471	K16166	Organismal Systems	Environmental adaptation	04712 Circadian rhythm - plant
Cluster_4557	"K10599,K03130,K10143,K12816"	Organismal Systems	Environmental adaptation	04712 Circadian rhythm - plant
Cluster_46262	K16166	Organismal Systems	Environmental adaptation	04712 Circadian rhythm - plant
Cluster_46795	"K12131,K12129"	Organismal Systems	Environmental adaptation	04712 Circadian rhythm - plant
Cluster_4699	"K16221,K13035"	Organismal Systems	Environmental adaptation	04712 Circadian rhythm - plant
Cluster_47054	"K12127,K12129,K03539,K19720,K12135"	Organismal Systems	Environmental adaptation	04712 Circadian rhythm - plant
Cluster_47736	"K19720,K12129,K03539"	Organismal Systems	Environmental adaptation	04712 Circadian rhythm - plant
Cluster_49669	K00660	Organismal Systems	Environmental adaptation	04712 Circadian rhythm - plant
Cluster_49681	"K12135,K12130,K12129,K12128,K12127"	Organismal Systems	Environmental adaptation	04712 Circadian rhythm - plant
Cluster_50460	"K09422,K16166"	Organismal Systems	Environmental adaptation	04712 Circadian rhythm - plant
Cluster_5047	"K16221,K13035"	Organismal Systems	Environmental adaptation	04712 Circadian rhythm - plant
Cluster_508	K12124	Organismal Systems	Environmental adaptation	04712 Circadian rhythm - plant
Cluster_51199	"K12128,K12129,K12130"	Organismal Systems	Environmental adaptation	04712 Circadian rhythm - plant
Cluster_51268	"K12129,K12130"	Organismal Systems	Environmental adaptation	04712 Circadian rhythm - plant
Cluster_51672	"K12130,K12128,K12129"	Organismal Systems	Environmental adaptation	04712 Circadian rhythm - plant
Cluster_534	"K12120,K12121"	Organismal Systems	Environmental adaptation	04712 Circadian rhythm - plant
Cluster_5388	K12126	Organismal Systems	Environmental adaptation	04712 Circadian rhythm - plant
Cluster_53898	K16222	Organismal Systems	Environmental adaptation	04712 Circadian rhythm - plant
Cluster_5422	"K12134,K12133"	Organismal Systems	Environmental adaptation	04712 Circadian rhythm - plant
Cluster_54778	K16221	Organismal Systems	Environmental adaptation	04712 Circadian rhythm - plant
Cluster_5515	"K12116,K12115"	Organismal Systems	Environmental adaptation	04712 Circadian rhythm - plant
Cluster_55294	K12119	Organismal Systems	Environmental adaptation	04712 Circadian rhythm - plant
Cluster_5559	K10143	Organismal Systems	Environmental adaptation	04712 Circadian rhythm - plant
Cluster_5595	"K16241,K03248"	Organismal Systems	Environmental adaptation	04712 Circadian rhythm - plant
Cluster_5608	"K10143,K10615"	Organismal Systems	Environmental adaptation	04712 Circadian rhythm - plant
Cluster_56695	K00660	Organismal Systems	Environmental adaptation	04712 Circadian rhythm - plant
Cluster_5673	"K10143,K10615"	Organismal Systems	Environmental adaptation	04712 Circadian rhythm - plant
Cluster_56939	K12119	Organismal Systems	Environmental adaptation	04712 Circadian rhythm - plant
Cluster_57391	"K12129,K12128,K12130"	Organismal Systems	Environmental adaptation	04712 Circadian rhythm - plant
Cluster_57959	K03115	Organismal Systems	Environmental adaptation	04712 Circadian rhythm - plant
Cluster_58483	K12125	Organismal Systems	Environmental adaptation	04712 Circadian rhythm - plant
Cluster_59113	K12115	Organismal Systems	Environmental adaptation	04712 Circadian rhythm - plant
Cluster_59499	K16222	Organismal Systems	Environmental adaptation	04712 Circadian rhythm - plant
Cluster_59541	K10143	Organismal Systems	Environmental adaptation	04712 Circadian rhythm - plant
Cluster_60046	K03097	Organismal Systems	Environmental adaptation	04712 Circadian rhythm - plant
Cluster_607	K12121	Organismal Systems	Environmental adaptation	04712 Circadian rhythm - plant
Cluster_6144	"K12116,K12115"	Organismal Systems	Environmental adaptation	04712 Circadian rhythm - plant
Cluster_62219	"K12133,K12134"	Organismal Systems	Environmental adaptation	04712 Circadian rhythm - plant
Cluster_6258	"K10615,K10143"	Organismal Systems	Environmental adaptation	04712 Circadian rhythm - plant
Cluster_6267	"K12129,K12131"	Organismal Systems	Environmental adaptation	04712 Circadian rhythm - plant
Cluster_63367	"K12130,K19720,K12127,K12129,K12135"	Organismal Systems	Environmental adaptation	04712 Circadian rhythm - plant
Cluster_63426	K00660	Organismal Systems	Environmental adaptation	04712 Circadian rhythm - plant
Cluster_64084	"K19720,K12135"	Organismal Systems	Environmental adaptation	04712 Circadian rhythm - plant
Cluster_6500	K16222	Organismal Systems	Environmental adaptation	04712 Circadian rhythm - plant
Cluster_65246	K03097	Organismal Systems	Environmental adaptation	04712 Circadian rhythm - plant
Cluster_655	K12121	Organismal Systems	Environmental adaptation	04712 Circadian rhythm - plant
Cluster_65863	K16222	Organismal Systems	Environmental adaptation	04712 Circadian rhythm - plant
Cluster_66806	"K09422,K16166,K02259"	Organismal Systems	Environmental adaptation	04712 Circadian rhythm - plant
Cluster_67198	K12127	Organismal Systems	Environmental adaptation	04712 Circadian rhythm - plant
Cluster_672	"K10260,K15542,K14555,K16240,K12862,K03130,K14556,K12662"	Organismal Systems	Environmental adaptation	04712 Circadian rhythm - plant
Cluster_673	"K07178,K01455,K08678,K16166,K13800,K01176,K12840,K01074,K00857,K00901"	Organismal Systems	Environmental adaptation	04712 Circadian rhythm - plant
Cluster_67953	K12130	Organismal Systems	Environmental adaptation	04712 Circadian rhythm - plant
Cluster_6845	K16222	Organismal Systems	Environmental adaptation	04712 Circadian rhythm - plant
Cluster_69653	K03097	Organismal Systems	Environmental adaptation	04712 Circadian rhythm - plant
Cluster_71588	"K12130,K19720,K12129,K12127,K12135"	Organismal Systems	Environmental adaptation	04712 Circadian rhythm - plant
Cluster_729	"K19720,K12135"	Organismal Systems	Environmental adaptation	04712 Circadian rhythm - plant
Cluster_7340	"K13035,K16221"	Organismal Systems	Environmental adaptation	04712 Circadian rhythm - plant
Cluster_7483	K12126	Organismal Systems	Environmental adaptation	04712 Circadian rhythm - plant
Cluster_75387	K00660	Organismal Systems	Environmental adaptation	04712 Circadian rhythm - plant
Cluster_7544	K12126	Organismal Systems	Environmental adaptation	04712 Circadian rhythm - plant
Cluster_7561	K16222	Organismal Systems	Environmental adaptation	04712 Circadian rhythm - plant
Cluster_7576	"K13035,K16221"	Organismal Systems	Environmental adaptation	04712 Circadian rhythm - plant
Cluster_774	"K12874,K12127,K03165"	Organismal Systems	Environmental adaptation	04712 Circadian rhythm - plant
Cluster_7740	"K13341,K10143"	Organismal Systems	Environmental adaptation	04712 Circadian rhythm - plant
Cluster_77868	K16241	Organismal Systems	Environmental adaptation	04712 Circadian rhythm - plant
Cluster_7812	K16240	Organismal Systems	Environmental adaptation	04712 Circadian rhythm - plant
Cluster_78907	K03097	Organismal Systems	Environmental adaptation	04712 Circadian rhythm - plant
Cluster_7922	"K13412,K04371,K03097,K03083,K14512,K06276"	Organismal Systems	Environmental adaptation	04712 Circadian rhythm - plant
Cluster_80449	K12129	Organismal Systems	Environmental adaptation	04712 Circadian rhythm - plant
Cluster_83025	K03115	Organismal Systems	Environmental adaptation	04712 Circadian rhythm - plant
Cluster_8486	K16222	Organismal Systems	Environmental adaptation	04712 Circadian rhythm - plant
Cluster_85005	"K09422,K02259,K16166"	Organismal Systems	Environmental adaptation	04712 Circadian rhythm - plant
Cluster_85152	K00660	Organismal Systems	Environmental adaptation	04712 Circadian rhythm - plant
Cluster_8634	"K16189,K12126"	Organismal Systems	Environmental adaptation	04712 Circadian rhythm - plant
Cluster_8768	"K10615,K10143"	Organismal Systems	Environmental adaptation	04712 Circadian rhythm - plant
Cluster_8819	"K12134,K12133"	Organismal Systems	Environmental adaptation	04712 Circadian rhythm - plant
Cluster_90265	K16222	Organismal Systems	Environmental adaptation	04712 Circadian rhythm - plant
Cluster_90751	K00660	Organismal Systems	Environmental adaptation	04712 Circadian rhythm - plant
Cluster_9125	"K13341,K10143"	Organismal Systems	Environmental adaptation	04712 Circadian rhythm - plant
Cluster_9175	"K03097,K14758,K13412,K06276"	Organismal Systems	Environmental adaptation	04712 Circadian rhythm - plant
Cluster_91910	K12130	Organismal Systems	Environmental adaptation	04712 Circadian rhythm - plant
Cluster_9374	K12130	Organismal Systems	Environmental adaptation	04712 Circadian rhythm - plant
Cluster_9382	"K15542,K10260,K16240,K12857,K14005,K10143,K13341"	Organismal Systems	Environmental adaptation	04712 Circadian rhythm - plant
Cluster_9384	"K12115,K14501,K12116"	Organismal Systems	Environmental adaptation	04712 Circadian rhythm - plant
Cluster_940	"K01535,K16166,K00166,K02259,K09422"	Organismal Systems	Environmental adaptation	04712 Circadian rhythm - plant
Cluster_9545	"K12116,K12115"	Organismal Systems	Environmental adaptation	04712 Circadian rhythm - plant
Cluster_9620	"K14512,K06276,K03083,K04371,K03097"	Organismal Systems	Environmental adaptation	04712 Circadian rhythm - plant
Cluster_9628	"K15542,K10260,K16240,K12857,K14005,K10143,K13341"	Organismal Systems	Environmental adaptation	04712 Circadian rhythm - plant
Cluster_966	K16241	Organismal Systems	Environmental adaptation	04712 Circadian rhythm - plant
Cluster_96640	K16221	Organismal Systems	Environmental adaptation	04712 Circadian rhythm - plant
Cluster_968	"K12115,K12116"	Organismal Systems	Environmental adaptation	04712 Circadian rhythm - plant
Cluster_97015	K03115	Organismal Systems	Environmental adaptation	04712 Circadian rhythm - plant
Cluster_977	"K10143,K10615"	Organismal Systems	Environmental adaptation	04712 Circadian rhythm - plant
Cluster_9841	K12126	Organismal Systems	Environmental adaptation	04712 Circadian rhythm - plant
Cluster_99356	K16221	Organismal Systems	Environmental adaptation	04712 Circadian rhythm - plant
Cluster_10028	"K13448,K13412"	Organismal Systems	Environmental adaptation	04626 Plant-pathogen interaction
Cluster_100378	K13436	Organismal Systems	Environmental adaptation	04626 Plant-pathogen interaction
Cluster_10050	"K13459,K13416,K01183,K13417"	Organismal Systems	Environmental adaptation	04626 Plant-pathogen interaction
Cluster_10052	"K13420,K13459,K01183,K13429,K13457,K13430,K13415,K13416"	Organismal Systems	Environmental adaptation	04626 Plant-pathogen interaction
Cluster_100619	K02183	Organismal Systems	Environmental adaptation	04626 Plant-pathogen interaction
Cluster_10089	"K13415,K13420,K13428,K13417,K13416"	Organismal Systems	Environmental adaptation	04626 Plant-pathogen interaction
Cluster_100894	K04079	Organismal Systems	Environmental adaptation	04626 Plant-pathogen interaction
Cluster_10093	"K13430,K13436,K13429,K13416"	Organismal Systems	Environmental adaptation	04626 Plant-pathogen interaction
Cluster_101225	K13412	Organismal Systems	Environmental adaptation	04626 Plant-pathogen interaction
Cluster_101239	"K02259,K09422,K16166"	Organismal Systems	Environmental adaptation	04626 Plant-pathogen interaction
Cluster_101242	"K01183,K13430,K13429"	Organismal Systems	Environmental adaptation	04626 Plant-pathogen interaction
Cluster_101589	K02183	Organismal Systems	Environmental adaptation	04626 Plant-pathogen interaction
Cluster_101600	K13436	Organismal Systems	Environmental adaptation	04626 Plant-pathogen interaction
Cluster_101623	"K13416,K01183,K13459"	Organismal Systems	Environmental adaptation	04626 Plant-pathogen interaction
Cluster_101645	"K13430,K13415"	Organismal Systems	Environmental adaptation	04626 Plant-pathogen interaction
Cluster_10193	"K13430,K13417,K13416"	Organismal Systems	Environmental adaptation	04626 Plant-pathogen interaction
Cluster_102440	K13412	Organismal Systems	Environmental adaptation	04626 Plant-pathogen interaction
Cluster_102454	K13412	Organismal Systems	Environmental adaptation	04626 Plant-pathogen interaction
Cluster_10247	"K08852,K16226,K02183,K01115,K13414,K05349,K14309,K03283"	Organismal Systems	Environmental adaptation	04626 Plant-pathogen interaction
Cluster_10261	"K13457,K00901"	Organismal Systems	Environmental adaptation	04626 Plant-pathogen interaction
Cluster_102722	K13412	Organismal Systems	Environmental adaptation	04626 Plant-pathogen interaction
Cluster_10300	"K13420,K13415"	Organismal Systems	Environmental adaptation	04626 Plant-pathogen interaction
Cluster_10302	"K13424,K18834,K18835"	Organismal Systems	Environmental adaptation	04626 Plant-pathogen interaction
Cluster_103243	"K01930,K13457"	Organismal Systems	Environmental adaptation	04626 Plant-pathogen interaction
Cluster_103272	"K13430,K13415,K13436,K01183,K13459"	Organismal Systems	Environmental adaptation	04626 Plant-pathogen interaction
Cluster_10346	"K14510,K13413"	Organismal Systems	Environmental adaptation	04626 Plant-pathogen interaction
Cluster_103511	K09487	Organismal Systems	Environmental adaptation	04626 Plant-pathogen interaction
Cluster_10391	K13412	Organismal Systems	Environmental adaptation	04626 Plant-pathogen interaction
Cluster_10405	"K13417,K13416,K13430"	Organismal Systems	Environmental adaptation	04626 Plant-pathogen interaction
Cluster_104098	K18875	Organismal Systems	Environmental adaptation	04626 Plant-pathogen interaction
Cluster_10412	"K13457,K01177"	Organismal Systems	Environmental adaptation	04626 Plant-pathogen interaction
Cluster_10417	"K13430,K01183,K13416"	Organismal Systems	Environmental adaptation	04626 Plant-pathogen interaction
Cluster_10428	"K01373,K01365"	Organismal Systems	Environmental adaptation	04626 Plant-pathogen interaction
Cluster_104498	K02183	Organismal Systems	Environmental adaptation	04626 Plant-pathogen interaction
Cluster_10464	K13413	Organismal Systems	Environmental adaptation	04626 Plant-pathogen interaction
Cluster_1049	"K13457,K13525,K16226,K08852,K13412,K14314,K14309,K16225,K03283"	Organismal Systems	Environmental adaptation	04626 Plant-pathogen interaction
Cluster_10524	"K16224,K13430,K18873"	Organismal Systems	Environmental adaptation	04626 Plant-pathogen interaction
Cluster_10533	K13414	Organismal Systems	Environmental adaptation	04626 Plant-pathogen interaction
Cluster_105666	K13412	Organismal Systems	Environmental adaptation	04626 Plant-pathogen interaction
Cluster_1058	"K00232,K01188,K04392,K14760,K17982,K01876,K05356,K05658,K03136,K14416,K13420,K00430,K13428,K00559,K03644,K12882"	Organismal Systems	Environmental adaptation	04626 Plant-pathogen interaction
Cluster_105846	K13447	Organismal Systems	Environmental adaptation	04626 Plant-pathogen interaction
Cluster_106	"K16226,K13436,K16225,K13430,K18873"	Organismal Systems	Environmental adaptation	04626 Plant-pathogen interaction
Cluster_10613	"K13424,K18834,K18835"	Organismal Systems	Environmental adaptation	04626 Plant-pathogen interaction
Cluster_106155	K13412	Organismal Systems	Environmental adaptation	04626 Plant-pathogen interaction
Cluster_10624	"K14512,K04371"	Organismal Systems	Environmental adaptation	04626 Plant-pathogen interaction
Cluster_10628	"K13424,K13426,K16225,K18835,K13425,K18834"	Organismal Systems	Environmental adaptation	04626 Plant-pathogen interaction
Cluster_106316	"K01183,K13415,K13430,K13459,K13436,K16224"	Organismal Systems	Environmental adaptation	04626 Plant-pathogen interaction
Cluster_10643	"K13430,K13436"	Organismal Systems	Environmental adaptation	04626 Plant-pathogen interaction
Cluster_10654	"K13420,K13428,K13415,K13459"	Organismal Systems	Environmental adaptation	04626 Plant-pathogen interaction
Cluster_106686	K13412	Organismal Systems	Environmental adaptation	04626 Plant-pathogen interaction
Cluster_10695	K13412	Organismal Systems	Environmental adaptation	04626 Plant-pathogen interaction
Cluster_10773	"K13430,K13417,K13416"	Organismal Systems	Environmental adaptation	04626 Plant-pathogen interaction
Cluster_1080	"K14489,K18834"	Organismal Systems	Environmental adaptation	04626 Plant-pathogen interaction
Cluster_10808	"K02202,K04371,K14512"	Organismal Systems	Environmental adaptation	04626 Plant-pathogen interaction
Cluster_10812	"K13430,K13415"	Organismal Systems	Environmental adaptation	04626 Plant-pathogen interaction
Cluster_108149	K02183	Organismal Systems	Environmental adaptation	04626 Plant-pathogen interaction
Cluster_10823	"K13430,K13436"	Organismal Systems	Environmental adaptation	04626 Plant-pathogen interaction
Cluster_108458	K13448	Organismal Systems	Environmental adaptation	04626 Plant-pathogen interaction
Cluster_10867	"K18835,K18834,K13424"	Organismal Systems	Environmental adaptation	04626 Plant-pathogen interaction
Cluster_10883	"K13424,K13423,K18834,K18835"	Organismal Systems	Environmental adaptation	04626 Plant-pathogen interaction
Cluster_10902	"K13430,K13436"	Organismal Systems	Environmental adaptation	04626 Plant-pathogen interaction
Cluster_109042	K13412	Organismal Systems	Environmental adaptation	04626 Plant-pathogen interaction
Cluster_10914	"K13415,K13430,K13429,K13436,K13459"	Organismal Systems	Environmental adaptation	04626 Plant-pathogen interaction
Cluster_10930	"K13415,K13430,K01183,K13436,K13459"	Organismal Systems	Environmental adaptation	04626 Plant-pathogen interaction
Cluster_10969	K13430	Organismal Systems	Environmental adaptation	04626 Plant-pathogen interaction
Cluster_10977	K13416	Organismal Systems	Environmental adaptation	04626 Plant-pathogen interaction
Cluster_10984	K13436	Organismal Systems	Environmental adaptation	04626 Plant-pathogen interaction
Cluster_10989	K13416	Organismal Systems	Environmental adaptation	04626 Plant-pathogen interaction
Cluster_1100	"K05349,K14309,K07466,K02183,K01115,K13414,K03283,K16225,K08852,K16226,K16911"	Organismal Systems	Environmental adaptation	04626 Plant-pathogen interaction
Cluster_1103	K13420	Organismal Systems	Environmental adaptation	04626 Plant-pathogen interaction
Cluster_11036	"K04079,K01889,K01915"	Organismal Systems	Environmental adaptation	04626 Plant-pathogen interaction
Cluster_110585	K13412	Organismal Systems	Environmental adaptation	04626 Plant-pathogen interaction
Cluster_11059	"K02259,K16166,K09422"	Organismal Systems	Environmental adaptation	04626 Plant-pathogen interaction
Cluster_11065	"K08269,K13412,K14758,K03097,K04688,K07198,K06276"	Organismal Systems	Environmental adaptation	04626 Plant-pathogen interaction
Cluster_11072	K13429	Organismal Systems	Environmental adaptation	04626 Plant-pathogen interaction
Cluster_11080	"K14512,K03097,K04371"	Organismal Systems	Environmental adaptation	04626 Plant-pathogen interaction
Cluster_111104	K02183	Organismal Systems	Environmental adaptation	04626 Plant-pathogen interaction
Cluster_11127	"K13416,K13459,K13430,K01183"	Organismal Systems	Environmental adaptation	04626 Plant-pathogen interaction
Cluster_11179	"K13416,K01183,K13415,K00276,K13417"	Organismal Systems	Environmental adaptation	04626 Plant-pathogen interaction
Cluster_11181	"K08269,K14510,K13414,K13429"	Organismal Systems	Environmental adaptation	04626 Plant-pathogen interaction
Cluster_11193	"K03097,K14758,K13412,K06276,K04688"	Organismal Systems	Environmental adaptation	04626 Plant-pathogen interaction
Cluster_111935	K13416	Organismal Systems	Environmental adaptation	04626 Plant-pathogen interaction
Cluster_112096	K13412	Organismal Systems	Environmental adaptation	04626 Plant-pathogen interaction
Cluster_11227	K13430	Organismal Systems	Environmental adaptation	04626 Plant-pathogen interaction
Cluster_112540	K13412	Organismal Systems	Environmental adaptation	04626 Plant-pathogen interaction
Cluster_11256	"K13459,K13416,K13430"	Organismal Systems	Environmental adaptation	04626 Plant-pathogen interaction
Cluster_1127	"K01183,K13430,K13416"	Organismal Systems	Environmental adaptation	04626 Plant-pathogen interaction
Cluster_11300	"K18873,K01183,K13430"	Organismal Systems	Environmental adaptation	04626 Plant-pathogen interaction
Cluster_11321	"K14517,K13432,K13433,K13434,K14516"	Organismal Systems	Environmental adaptation	04626 Plant-pathogen interaction
Cluster_1133	K13457	Organismal Systems	Environmental adaptation	04626 Plant-pathogen interaction
Cluster_11348	"K13424,K18835"	Organismal Systems	Environmental adaptation	04626 Plant-pathogen interaction
Cluster_113550	K12795	Organismal Systems	Environmental adaptation	04626 Plant-pathogen interaction
Cluster_113551	"K16166,K02259,K09422"	Organismal Systems	Environmental adaptation	04626 Plant-pathogen interaction
Cluster_11363	"K02259,K16166,K09422"	Organismal Systems	Environmental adaptation	04626 Plant-pathogen interaction
Cluster_1138	"K13416,K13436,K16224,K13459,K01176,K01886,K13429,K00276,K13415,K13430,K13420,K01183"	Organismal Systems	Environmental adaptation	04626 Plant-pathogen interaction
Cluster_113929	"K02183,K13412"	Organismal Systems	Environmental adaptation	04626 Plant-pathogen interaction
Cluster_114035	K13448	Organismal Systems	Environmental adaptation	04626 Plant-pathogen interaction
Cluster_114540	K13412	Organismal Systems	Environmental adaptation	04626 Plant-pathogen interaction
Cluster_115004	K13412	Organismal Systems	Environmental adaptation	04626 Plant-pathogen interaction
Cluster_115031	K13412	Organismal Systems	Environmental adaptation	04626 Plant-pathogen interaction
Cluster_11515	"K13416,K18873,K13430"	Organismal Systems	Environmental adaptation	04626 Plant-pathogen interaction
Cluster_11538	"K16166,K02259,K09422"	Organismal Systems	Environmental adaptation	04626 Plant-pathogen interaction
Cluster_11557	K14512	Organismal Systems	Environmental adaptation	04626 Plant-pathogen interaction
Cluster_115629	K13412	Organismal Systems	Environmental adaptation	04626 Plant-pathogen interaction
Cluster_11588	K05391	Organismal Systems	Environmental adaptation	04626 Plant-pathogen interaction
Cluster_11592	"K14517,K14516,K03021,K13432,K13434"	Organismal Systems	Environmental adaptation	04626 Plant-pathogen interaction
Cluster_1165	K13414	Organismal Systems	Environmental adaptation	04626 Plant-pathogen interaction
Cluster_116593	"K13429,K13415,K01183,K13436,K13459"	Organismal Systems	Environmental adaptation	04626 Plant-pathogen interaction
Cluster_11670	"K03021,K13434,K14516,K14517"	Organismal Systems	Environmental adaptation	04626 Plant-pathogen interaction
Cluster_1172	"K04077,K03644,K12882,K13420,K12741,K07198,K05658,K00654,K01191,K02350,K00799,K00627,K01209,K01876,K12619,K01623,K01188,K14760,K04392,K07374"	Organismal Systems	Environmental adaptation	04626 Plant-pathogen interaction
Cluster_11729	"K14516,K03021,K13432,K13434,K14517"	Organismal Systems	Environmental adaptation	04626 Plant-pathogen interaction
Cluster_11776	"K18835,K13424"	Organismal Systems	Environmental adaptation	04626 Plant-pathogen interaction
Cluster_11807	"K16166,K02259,K09422"	Organismal Systems	Environmental adaptation	04626 Plant-pathogen interaction
Cluster_118092	K13429	Organismal Systems	Environmental adaptation	04626 Plant-pathogen interaction
Cluster_118094	"K13430,K01183,K13459,K13416"	Organismal Systems	Environmental adaptation	04626 Plant-pathogen interaction
Cluster_11832	"K13436,K13430"	Organismal Systems	Environmental adaptation	04626 Plant-pathogen interaction
Cluster_1185	"K13415,K13420,K13456"	Organismal Systems	Environmental adaptation	04626 Plant-pathogen interaction
Cluster_11863	"K13424,K13426,K18835,K13425,K16225,K18834"	Organismal Systems	Environmental adaptation	04626 Plant-pathogen interaction
Cluster_11879	"K18873,K13430,K13416"	Organismal Systems	Environmental adaptation	04626 Plant-pathogen interaction
Cluster_1188	"K13420,K13428"	Organismal Systems	Environmental adaptation	04626 Plant-pathogen interaction
Cluster_119092	K04079	Organismal Systems	Environmental adaptation	04626 Plant-pathogen interaction
Cluster_11910	"K13420,K13415"	Organismal Systems	Environmental adaptation	04626 Plant-pathogen interaction
Cluster_1197	"K13459,K01183,K13430,K18873,K05349"	Organismal Systems	Environmental adaptation	04626 Plant-pathogen interaction
Cluster_11970	K04371	Organismal Systems	Environmental adaptation	04626 Plant-pathogen interaction
Cluster_11972	K13459	Organismal Systems	Environmental adaptation	04626 Plant-pathogen interaction
Cluster_11983	K13430	Organismal Systems	Environmental adaptation	04626 Plant-pathogen interaction
Cluster_12014	"K14516,K13434,K13432,K03021,K13433,K14517"	Organismal Systems	Environmental adaptation	04626 Plant-pathogen interaction
Cluster_12034	K13448	Organismal Systems	Environmental adaptation	04626 Plant-pathogen interaction
Cluster_12050	"K14516,K13434,K03021,K13433,K13432,K14517"	Organismal Systems	Environmental adaptation	04626 Plant-pathogen interaction
Cluster_12067	"K13416,K13417"	Organismal Systems	Environmental adaptation	04626 Plant-pathogen interaction
Cluster_12078	"K16224,K13416,K13430"	Organismal Systems	Environmental adaptation	04626 Plant-pathogen interaction
Cluster_12080	"K16226,K03283,K16225,K14314"	Organismal Systems	Environmental adaptation	04626 Plant-pathogen interaction
Cluster_12163	"K13420,K13429,K16224,K13436"	Organismal Systems	Environmental adaptation	04626 Plant-pathogen interaction
Cluster_12185	K13416	Organismal Systems	Environmental adaptation	04626 Plant-pathogen interaction
Cluster_12255	K13436	Organismal Systems	Environmental adaptation	04626 Plant-pathogen interaction
Cluster_1226	"K13466,K02146,K13420,K13428,K13415"	Organismal Systems	Environmental adaptation	04626 Plant-pathogen interaction
Cluster_12336	"K13424,K13423,K18834,K18835"	Organismal Systems	Environmental adaptation	04626 Plant-pathogen interaction
Cluster_12358	"K13416,K13417,K13430"	Organismal Systems	Environmental adaptation	04626 Plant-pathogen interaction
Cluster_124	"K05756,K00566,K01738,K12819,K13356,K13457,K05666,K16196,K05605,K01191,K15086"	Organismal Systems	Environmental adaptation	04626 Plant-pathogen interaction
Cluster_12406	"K03083,K04688,K07198,K03097,K02202,K08269,K13412"	Organismal Systems	Environmental adaptation	04626 Plant-pathogen interaction
Cluster_1244	"K02350,K00627,K12619,K07374,K14760,K03283,K01623,K04077,K14539,K12882,K01456,K12741,K07198,K13420,K13428,K01191,K05658,K00654,K05356"	Organismal Systems	Environmental adaptation	04626 Plant-pathogen interaction
Cluster_12445	"K09291,K00826,K13420"	Organismal Systems	Environmental adaptation	04626 Plant-pathogen interaction
Cluster_12449	"K09422,K02259,K16166"	Organismal Systems	Environmental adaptation	04626 Plant-pathogen interaction
Cluster_12451	K13430	Organismal Systems	Environmental adaptation	04626 Plant-pathogen interaction
Cluster_1246	"K13415,K13420,K13428"	Organismal Systems	Environmental adaptation	04626 Plant-pathogen interaction
Cluster_12464	"K03021,K13433,K13432,K13434,K14516,K14517"	Organismal Systems	Environmental adaptation	04626 Plant-pathogen interaction
Cluster_12479	"K13424,K13423"	Organismal Systems	Environmental adaptation	04626 Plant-pathogen interaction
Cluster_12486	"K13416,K13430,K18873"	Organismal Systems	Environmental adaptation	04626 Plant-pathogen interaction
Cluster_12526	"K09422,K02259,K16166"	Organismal Systems	Environmental adaptation	04626 Plant-pathogen interaction
Cluster_1253	"K13459,K13430"	Organismal Systems	Environmental adaptation	04626 Plant-pathogen interaction
Cluster_12573	"K13448,K13412"	Organismal Systems	Environmental adaptation	04626 Plant-pathogen interaction
Cluster_12584	"K13430,K01183"	Organismal Systems	Environmental adaptation	04626 Plant-pathogen interaction
Cluster_126	"K12489,K14497,K14487,K03243,K08081,K04079,K00815,K07466,K01251,K17982"	Organismal Systems	Environmental adaptation	04626 Plant-pathogen interaction
Cluster_12610	"K14516,K13434,K01689"	Organismal Systems	Environmental adaptation	04626 Plant-pathogen interaction
Cluster_12656	K13430	Organismal Systems	Environmental adaptation	04626 Plant-pathogen interaction
Cluster_12733	"K13416,K13415,K01183"	Organismal Systems	Environmental adaptation	04626 Plant-pathogen interaction
Cluster_12750	"K13460,K13459"	Organismal Systems	Environmental adaptation	04626 Plant-pathogen interaction
Cluster_1279	K13420	Organismal Systems	Environmental adaptation	04626 Plant-pathogen interaction
Cluster_12797	K13430	Organismal Systems	Environmental adaptation	04626 Plant-pathogen interaction
Cluster_12818	"K12472,K13420,K09291"	Organismal Systems	Environmental adaptation	04626 Plant-pathogen interaction
Cluster_12832	"K07198,K04688,K06276,K13412,K14758"	Organismal Systems	Environmental adaptation	04626 Plant-pathogen interaction
Cluster_12838	K13430	Organismal Systems	Environmental adaptation	04626 Plant-pathogen interaction
Cluster_12897	"K01148,K13448"	Organismal Systems	Environmental adaptation	04626 Plant-pathogen interaction
Cluster_13076	K13457	Organismal Systems	Environmental adaptation	04626 Plant-pathogen interaction
Cluster_13117	K13459	Organismal Systems	Environmental adaptation	04626 Plant-pathogen interaction
Cluster_1312	K13420	Organismal Systems	Environmental adaptation	04626 Plant-pathogen interaction
Cluster_1315	"K13416,K18873,K01183,K13430"	Organismal Systems	Environmental adaptation	04626 Plant-pathogen interaction
Cluster_13150	"K13430,K18873"	Organismal Systems	Environmental adaptation	04626 Plant-pathogen interaction
Cluster_13190	K13430	Organismal Systems	Environmental adaptation	04626 Plant-pathogen interaction
Cluster_1320	K13420	Organismal Systems	Environmental adaptation	04626 Plant-pathogen interaction
Cluster_13307	"K13473,K13429"	Organismal Systems	Environmental adaptation	04626 Plant-pathogen interaction
Cluster_13335	"K14517,K14516,K13434,K03021,K13433,K13432"	Organismal Systems	Environmental adaptation	04626 Plant-pathogen interaction
Cluster_13350	K13459	Organismal Systems	Environmental adaptation	04626 Plant-pathogen interaction
Cluster_13357	"K13414,K01115,K03283,K16911,K08852,K16226,K05349,K14309,K07466,K02183"	Organismal Systems	Environmental adaptation	04626 Plant-pathogen interaction
Cluster_13384	K13424	Organismal Systems	Environmental adaptation	04626 Plant-pathogen interaction
Cluster_1340	"K13420,K13428,K13415"	Organismal Systems	Environmental adaptation	04626 Plant-pathogen interaction
Cluster_13418	"K14517,K14516,K13434"	Organismal Systems	Environmental adaptation	04626 Plant-pathogen interaction
Cluster_13445	"K14516,K03021,K13434"	Organismal Systems	Environmental adaptation	04626 Plant-pathogen interaction
Cluster_13468	"K16224,K13459,K13430,K13429"	Organismal Systems	Environmental adaptation	04626 Plant-pathogen interaction
Cluster_135	"K00654,K05658,K01191,K05356,K01456,K00559,K12882,K14539,K04077,K13428,K13420,K07198,K12741,K12619,K01623,K03283,K14760,K07374,K02350,K00627"	Organismal Systems	Environmental adaptation	04626 Plant-pathogen interaction
Cluster_13520	"K03283,K04646,K01115,K13414,K08852,K16226,K14309,K05349,K02183"	Organismal Systems	Environmental adaptation	04626 Plant-pathogen interaction
Cluster_13553	"K13420,K13415"	Organismal Systems	Environmental adaptation	04626 Plant-pathogen interaction
Cluster_1357	K05391	Organismal Systems	Environmental adaptation	04626 Plant-pathogen interaction
Cluster_13625	"K13416,K18873,K01183,K13430,K13415"	Organismal Systems	Environmental adaptation	04626 Plant-pathogen interaction
Cluster_13626	K13448	Organismal Systems	Environmental adaptation	04626 Plant-pathogen interaction
Cluster_13679	"K02183,K13448"	Organismal Systems	Environmental adaptation	04626 Plant-pathogen interaction
Cluster_13734	"K16166,K02259,K09422"	Organismal Systems	Environmental adaptation	04626 Plant-pathogen interaction
Cluster_1374	"K13428,K13420"	Organismal Systems	Environmental adaptation	04626 Plant-pathogen interaction
Cluster_13802	"K13424,K18835"	Organismal Systems	Environmental adaptation	04626 Plant-pathogen interaction
Cluster_13822	"K13416,K13415"	Organismal Systems	Environmental adaptation	04626 Plant-pathogen interaction
Cluster_1383	"K13420,K13428"	Organismal Systems	Environmental adaptation	04626 Plant-pathogen interaction
Cluster_13864	K05391	Organismal Systems	Environmental adaptation	04626 Plant-pathogen interaction
Cluster_13888	K13448	Organismal Systems	Environmental adaptation	04626 Plant-pathogen interaction
Cluster_13889	"K13424,K13426,K13425"	Organismal Systems	Environmental adaptation	04626 Plant-pathogen interaction
Cluster_1390	"K13457,K07466,K02183,K05349,K14309,K16226,K08852,K16911,K01115,K04646,K13414,K03283,K16225"	Organismal Systems	Environmental adaptation	04626 Plant-pathogen interaction
Cluster_1391	"K13436,K13430"	Organismal Systems	Environmental adaptation	04626 Plant-pathogen interaction
Cluster_13925	K13430	Organismal Systems	Environmental adaptation	04626 Plant-pathogen interaction
Cluster_13980	K13412	Organismal Systems	Environmental adaptation	04626 Plant-pathogen interaction
Cluster_1402	"K13430,K18873,K13436"	Organismal Systems	Environmental adaptation	04626 Plant-pathogen interaction
Cluster_14035	K13412	Organismal Systems	Environmental adaptation	04626 Plant-pathogen interaction
Cluster_1407	"K13416,K01183"	Organismal Systems	Environmental adaptation	04626 Plant-pathogen interaction
Cluster_14090	K12795	Organismal Systems	Environmental adaptation	04626 Plant-pathogen interaction
Cluster_14148	K05391	Organismal Systems	Environmental adaptation	04626 Plant-pathogen interaction
Cluster_14212	"K13420,K13428"	Organismal Systems	Environmental adaptation	04626 Plant-pathogen interaction
Cluster_14248	"K13420,K13428,K13415"	Organismal Systems	Environmental adaptation	04626 Plant-pathogen interaction
Cluster_14296	"K13420,K13415"	Organismal Systems	Environmental adaptation	04626 Plant-pathogen interaction
Cluster_14321	"K13459,K15777"	Organismal Systems	Environmental adaptation	04626 Plant-pathogen interaction
Cluster_14328	"K01373,K01365"	Organismal Systems	Environmental adaptation	04626 Plant-pathogen interaction
Cluster_14341	"K13416,K01183,K13430"	Organismal Systems	Environmental adaptation	04626 Plant-pathogen interaction
Cluster_14346	"K13425,K13426,K13424"	Organismal Systems	Environmental adaptation	04626 Plant-pathogen interaction
Cluster_14353	"K13436,K13430"	Organismal Systems	Environmental adaptation	04626 Plant-pathogen interaction
Cluster_14383	"K13434,K03021,K14516,K14517,K01689"	Organismal Systems	Environmental adaptation	04626 Plant-pathogen interaction
Cluster_1443	"K18873,K01183,K13430,K13416"	Organismal Systems	Environmental adaptation	04626 Plant-pathogen interaction
Cluster_14436	"K01365,K01373"	Organismal Systems	Environmental adaptation	04626 Plant-pathogen interaction
Cluster_14486	"K14517,K14516,K13434,K13432,K03021"	Organismal Systems	Environmental adaptation	04626 Plant-pathogen interaction
Cluster_14547	K13429	Organismal Systems	Environmental adaptation	04626 Plant-pathogen interaction
Cluster_14550	"K13416,K13430,K13415,K13417"	Organismal Systems	Environmental adaptation	04626 Plant-pathogen interaction
Cluster_14557	"K13424,K18835"	Organismal Systems	Environmental adaptation	04626 Plant-pathogen interaction
Cluster_14560	"K13429,K16224"	Organismal Systems	Environmental adaptation	04626 Plant-pathogen interaction
Cluster_14611	"K13425,K13424"	Organismal Systems	Environmental adaptation	04626 Plant-pathogen interaction
Cluster_14626	"K13430,K13436"	Organismal Systems	Environmental adaptation	04626 Plant-pathogen interaction
Cluster_14627	"K02259,K16166,K09422"	Organismal Systems	Environmental adaptation	04626 Plant-pathogen interaction
Cluster_14656	K13448	Organismal Systems	Environmental adaptation	04626 Plant-pathogen interaction
Cluster_1472	"K05356,K05658,K01191,K03136,K13420,K07198,K12741,K01456,K12882,K03644,K04077,K01623,K17982,K04392,K14760,K07374,K01188,K12619,K00627,K01876,K02350"	Organismal Systems	Environmental adaptation	04626 Plant-pathogen interaction
Cluster_14743	K05391	Organismal Systems	Environmental adaptation	04626 Plant-pathogen interaction
Cluster_14755	"K13415,K13457,K13420"	Organismal Systems	Environmental adaptation	04626 Plant-pathogen interaction
Cluster_1478	K13447	Organismal Systems	Environmental adaptation	04626 Plant-pathogen interaction
Cluster_14801	K13473	Organismal Systems	Environmental adaptation	04626 Plant-pathogen interaction
Cluster_1482	K13412	Organismal Systems	Environmental adaptation	04626 Plant-pathogen interaction
Cluster_14885	"K13415,K13428,K13420"	Organismal Systems	Environmental adaptation	04626 Plant-pathogen interaction
Cluster_1491	"K16225,K03283,K13459,K08852,K13412,K16911,K14309,K13457"	Organismal Systems	Environmental adaptation	04626 Plant-pathogen interaction
Cluster_14930	"K01183,K13417,K13436,K13416,K03283"	Organismal Systems	Environmental adaptation	04626 Plant-pathogen interaction
Cluster_14935	K13448	Organismal Systems	Environmental adaptation	04626 Plant-pathogen interaction
Cluster_14954	"K13412,K14758"	Organismal Systems	Environmental adaptation	04626 Plant-pathogen interaction
Cluster_14960	K13448	Organismal Systems	Environmental adaptation	04626 Plant-pathogen interaction
Cluster_1499	"K13459,K16226,K08852,K13412,K16911,K03283,K16225,K02183,K13457"	Organismal Systems	Environmental adaptation	04626 Plant-pathogen interaction
Cluster_14992	"K09422,K02259,K16166"	Organismal Systems	Environmental adaptation	04626 Plant-pathogen interaction
Cluster_1501	"K13436,K13416,K13429,K13430,K13417"	Organismal Systems	Environmental adaptation	04626 Plant-pathogen interaction
Cluster_15057	"K16166,K02259,K09422"	Organismal Systems	Environmental adaptation	04626 Plant-pathogen interaction
Cluster_15079	K13436	Organismal Systems	Environmental adaptation	04626 Plant-pathogen interaction
Cluster_15100	"K01191,K15086,K13356,K13457,K10599,K05666,K12819,K12153,K14513"	Organismal Systems	Environmental adaptation	04626 Plant-pathogen interaction
Cluster_15127	K13414	Organismal Systems	Environmental adaptation	04626 Plant-pathogen interaction
Cluster_15135	K13414	Organismal Systems	Environmental adaptation	04626 Plant-pathogen interaction
Cluster_1517	K13420	Organismal Systems	Environmental adaptation	04626 Plant-pathogen interaction
Cluster_15200	"K18873,K13430"	Organismal Systems	Environmental adaptation	04626 Plant-pathogen interaction
Cluster_15252	"K14517,K01689,K13434,K03021,K14516"	Organismal Systems	Environmental adaptation	04626 Plant-pathogen interaction
Cluster_15253	"K18835,K13424"	Organismal Systems	Environmental adaptation	04626 Plant-pathogen interaction
Cluster_15273	"K13428,K13420,K13415,K02984"	Organismal Systems	Environmental adaptation	04626 Plant-pathogen interaction
Cluster_15318	"K13428,K13420"	Organismal Systems	Environmental adaptation	04626 Plant-pathogen interaction
Cluster_15330	"K14516,K13434,K03021"	Organismal Systems	Environmental adaptation	04626 Plant-pathogen interaction
Cluster_15334	"K13416,K13415,K13420,K13428"	Organismal Systems	Environmental adaptation	04626 Plant-pathogen interaction
Cluster_15379	K13430	Organismal Systems	Environmental adaptation	04626 Plant-pathogen interaction
Cluster_154	"K13430,K03238,K16224"	Organismal Systems	Environmental adaptation	04626 Plant-pathogen interaction
Cluster_15414	K13412	Organismal Systems	Environmental adaptation	04626 Plant-pathogen interaction
Cluster_15474	"K13434,K13433,K03021,K13432,K14516,K14517"	Organismal Systems	Environmental adaptation	04626 Plant-pathogen interaction
Cluster_15511	K13473	Organismal Systems	Environmental adaptation	04626 Plant-pathogen interaction
Cluster_15521	"K13424,K13426,K13425,K18835,K16225"	Organismal Systems	Environmental adaptation	04626 Plant-pathogen interaction
Cluster_1556	"K13436,K13429,K13430"	Organismal Systems	Environmental adaptation	04626 Plant-pathogen interaction
Cluster_1564	"K13416,K13417"	Organismal Systems	Environmental adaptation	04626 Plant-pathogen interaction
Cluster_15710	K13414	Organismal Systems	Environmental adaptation	04626 Plant-pathogen interaction
Cluster_1572	"K13417,K13430,K13429,K13416,K13459,K16224"	Organismal Systems	Environmental adaptation	04626 Plant-pathogen interaction
Cluster_15720	K13448	Organismal Systems	Environmental adaptation	04626 Plant-pathogen interaction
Cluster_15835	"K13424,K13423,K18834,K02888"	Organismal Systems	Environmental adaptation	04626 Plant-pathogen interaction
Cluster_1586	"K14309,K13459,K08852,K16226,K16911,K03283,K16225"	Organismal Systems	Environmental adaptation	04626 Plant-pathogen interaction
Cluster_15886	"K16224,K13436"	Organismal Systems	Environmental adaptation	04626 Plant-pathogen interaction
Cluster_15931	"K14517,K14516,K13432,K13433,K03021,K13434"	Organismal Systems	Environmental adaptation	04626 Plant-pathogen interaction
Cluster_15935	"K03021,K13433,K13432,K13434,K14516,K14517"	Organismal Systems	Environmental adaptation	04626 Plant-pathogen interaction
Cluster_15945	"K13432,K13434,K14516,K14517"	Organismal Systems	Environmental adaptation	04626 Plant-pathogen interaction
Cluster_16049	K18875	Organismal Systems	Environmental adaptation	04626 Plant-pathogen interaction
Cluster_16100	"K13426,K13425,K13424"	Organismal Systems	Environmental adaptation	04626 Plant-pathogen interaction
Cluster_16112	K13430	Organismal Systems	Environmental adaptation	04626 Plant-pathogen interaction
Cluster_1612	K13412	Organismal Systems	Environmental adaptation	04626 Plant-pathogen interaction
Cluster_16176	"K05349,K14309,K07466,K02183,K04646,K01115,K13414,K03283,K08852,K16226,K16911"	Organismal Systems	Environmental adaptation	04626 Plant-pathogen interaction
Cluster_16203	"K14517,K13434,K03021,K14516"	Organismal Systems	Environmental adaptation	04626 Plant-pathogen interaction
Cluster_16208	K13430	Organismal Systems	Environmental adaptation	04626 Plant-pathogen interaction
Cluster_16276	K05391	Organismal Systems	Environmental adaptation	04626 Plant-pathogen interaction
Cluster_1628	"K13466,K13428,K13420"	Organismal Systems	Environmental adaptation	04626 Plant-pathogen interaction
Cluster_1633	K13420	Organismal Systems	Environmental adaptation	04626 Plant-pathogen interaction
Cluster_16338	"K02259,K16166,K09422"	Organismal Systems	Environmental adaptation	04626 Plant-pathogen interaction
Cluster_16409	"K13416,K13459,K01183,K13430"	Organismal Systems	Environmental adaptation	04626 Plant-pathogen interaction
Cluster_16471	"K13430,K13416"	Organismal Systems	Environmental adaptation	04626 Plant-pathogen interaction
Cluster_1652	"K13430,K18873"	Organismal Systems	Environmental adaptation	04626 Plant-pathogen interaction
Cluster_16520	"K14517,K14516,K13434,K13433,K13432"	Organismal Systems	Environmental adaptation	04626 Plant-pathogen interaction
Cluster_16550	"K01689,K14516,K13434,K03021"	Organismal Systems	Environmental adaptation	04626 Plant-pathogen interaction
Cluster_16644	"K16166,K02259,K09422"	Organismal Systems	Environmental adaptation	04626 Plant-pathogen interaction
Cluster_1668	"K19720,K13434,K06236"	Organismal Systems	Environmental adaptation	04626 Plant-pathogen interaction
Cluster_16688	"K16166,K02259,K09584,K09422"	Organismal Systems	Environmental adaptation	04626 Plant-pathogen interaction
Cluster_1677	"K13429,K13415,K13430,K16224"	Organismal Systems	Environmental adaptation	04626 Plant-pathogen interaction
Cluster_16772	K04371	Organismal Systems	Environmental adaptation	04626 Plant-pathogen interaction
Cluster_16827	"K02183,K13448"	Organismal Systems	Environmental adaptation	04626 Plant-pathogen interaction
Cluster_16850	"K08852,K16226,K01115,K13414,K03283,K07466,K02183,K05349,K14309"	Organismal Systems	Environmental adaptation	04626 Plant-pathogen interaction
Cluster_16851	"K14517,K13432,K13433,K14516"	Organismal Systems	Environmental adaptation	04626 Plant-pathogen interaction
Cluster_1697	"K18873,K13430,K13415,K13436,K16224"	Organismal Systems	Environmental adaptation	04626 Plant-pathogen interaction
Cluster_16978	"K01365,K01373"	Organismal Systems	Environmental adaptation	04626 Plant-pathogen interaction
Cluster_16998	"K13416,K13436,K14500,K18873,K00276,K13429,K13430,K13420"	Organismal Systems	Environmental adaptation	04626 Plant-pathogen interaction
Cluster_17026	"K13459,K13436,K13430,K13415,K13429"	Organismal Systems	Environmental adaptation	04626 Plant-pathogen interaction
Cluster_1708	K05391	Organismal Systems	Environmental adaptation	04626 Plant-pathogen interaction
Cluster_17156	K13420	Organismal Systems	Environmental adaptation	04626 Plant-pathogen interaction
Cluster_17180	"K08852,K16226,K03283,K13414,K01115,K02183,K07466,K13448,K14309,K05349"	Organismal Systems	Environmental adaptation	04626 Plant-pathogen interaction
Cluster_17236	K13425	Organismal Systems	Environmental adaptation	04626 Plant-pathogen interaction
Cluster_17241	"K13424,K18835"	Organismal Systems	Environmental adaptation	04626 Plant-pathogen interaction
Cluster_1727	K18875	Organismal Systems	Environmental adaptation	04626 Plant-pathogen interaction
Cluster_17290	"K13459,K13457"	Organismal Systems	Environmental adaptation	04626 Plant-pathogen interaction
Cluster_17305	"K14517,K14516,K13433,K13432"	Organismal Systems	Environmental adaptation	04626 Plant-pathogen interaction
Cluster_17359	"K13415,K13428,K13420"	Organismal Systems	Environmental adaptation	04626 Plant-pathogen interaction
Cluster_17364	"K13420,K01183,K13430,K13416,K13459,K13436,K16224"	Organismal Systems	Environmental adaptation	04626 Plant-pathogen interaction
Cluster_17387	"K13459,K18873,K01183"	Organismal Systems	Environmental adaptation	04626 Plant-pathogen interaction
Cluster_1743	K13448	Organismal Systems	Environmental adaptation	04626 Plant-pathogen interaction
Cluster_17446	"K08269,K04371,K13414,K03097,K06276"	Organismal Systems	Environmental adaptation	04626 Plant-pathogen interaction
Cluster_17534	"K14512,K04371"	Organismal Systems	Environmental adaptation	04626 Plant-pathogen interaction
Cluster_1756	"K13460,K13459"	Organismal Systems	Environmental adaptation	04626 Plant-pathogen interaction
Cluster_17584	K13412	Organismal Systems	Environmental adaptation	04626 Plant-pathogen interaction
Cluster_17585	"K01689,K13434,K14516"	Organismal Systems	Environmental adaptation	04626 Plant-pathogen interaction
Cluster_1761	"K14517,K13432,K13434,K14516"	Organismal Systems	Environmental adaptation	04626 Plant-pathogen interaction
Cluster_17625	"K03021,K13432,K13434,K14516,K14517"	Organismal Systems	Environmental adaptation	04626 Plant-pathogen interaction
Cluster_1771	K13420	Organismal Systems	Environmental adaptation	04626 Plant-pathogen interaction
Cluster_17732	K18875	Organismal Systems	Environmental adaptation	04626 Plant-pathogen interaction
Cluster_17740	"K13416,K01183"	Organismal Systems	Environmental adaptation	04626 Plant-pathogen interaction
Cluster_17766	"K13425,K13426"	Organismal Systems	Environmental adaptation	04626 Plant-pathogen interaction
Cluster_17768	"K13415,K13428,K13420,K01188,K13416"	Organismal Systems	Environmental adaptation	04626 Plant-pathogen interaction
Cluster_17791	"K14517,K14516,K13432,K13433,K13434"	Organismal Systems	Environmental adaptation	04626 Plant-pathogen interaction
Cluster_1780	"K14416,K01191,K01456,K12598,K12741,K07198,K12619,K01623,K13436,K02350,K00627,K01209"	Organismal Systems	Environmental adaptation	04626 Plant-pathogen interaction
Cluster_17836	"K18834,K18835,K13425,K16225,K13426"	Organismal Systems	Environmental adaptation	04626 Plant-pathogen interaction
Cluster_17847	"K13430,K16224"	Organismal Systems	Environmental adaptation	04626 Plant-pathogen interaction
Cluster_17913	"K09422,K02259,K16166"	Organismal Systems	Environmental adaptation	04626 Plant-pathogen interaction
Cluster_17953	K00864	Organismal Systems	Environmental adaptation	04626 Plant-pathogen interaction
Cluster_17964	"K13432,K03021,K13433,K13434,K14516,K14517"	Organismal Systems	Environmental adaptation	04626 Plant-pathogen interaction
Cluster_17981	"K04368,K13413"	Organismal Systems	Environmental adaptation	04626 Plant-pathogen interaction
Cluster_18004	"K07466,K02183,K05349,K14309,K08852,K16226,K16911,K01115,K03283"	Organismal Systems	Environmental adaptation	04626 Plant-pathogen interaction
Cluster_18028	K13412	Organismal Systems	Environmental adaptation	04626 Plant-pathogen interaction
Cluster_1803	"K16226,K16225"	Organismal Systems	Environmental adaptation	04626 Plant-pathogen interaction
Cluster_18071	K13434	Organismal Systems	Environmental adaptation	04626 Plant-pathogen interaction
Cluster_18075	"K13425,K13424"	Organismal Systems	Environmental adaptation	04626 Plant-pathogen interaction
Cluster_18120	"K13416,K13459,K13412,K13436,K16224,K12489,K01183,K00276,K13429,K13430"	Organismal Systems	Environmental adaptation	04626 Plant-pathogen interaction
Cluster_18139	"K09422,K16166,K02259"	Organismal Systems	Environmental adaptation	04626 Plant-pathogen interaction
Cluster_1816	K13420	Organismal Systems	Environmental adaptation	04626 Plant-pathogen interaction
Cluster_18172	"K02183,K13412"	Organismal Systems	Environmental adaptation	04626 Plant-pathogen interaction
Cluster_18176	"K14516,K13434,K03021,K13432,K14517"	Organismal Systems	Environmental adaptation	04626 Plant-pathogen interaction
Cluster_18195	"K18834,K18835,K13425,K16225,K13426"	Organismal Systems	Environmental adaptation	04626 Plant-pathogen interaction
Cluster_18197	"K13424,K13426,K16225,K18835,K13425"	Organismal Systems	Environmental adaptation	04626 Plant-pathogen interaction
Cluster_18205	"K13416,K13417"	Organismal Systems	Environmental adaptation	04626 Plant-pathogen interaction
Cluster_18237	"K09422,K16166,K12860,K02259"	Organismal Systems	Environmental adaptation	04626 Plant-pathogen interaction
Cluster_18238	K13416	Organismal Systems	Environmental adaptation	04626 Plant-pathogen interaction
Cluster_1830	"K01868,K00799,K01876,K12619,K01623,K03575,K01188,K07374,K04392,K14760,K17982,K00559,K03644,K14489,K12882,K13420,K05658,K03136,K01191,K01006,K05356"	Organismal Systems	Environmental adaptation	04626 Plant-pathogen interaction
Cluster_18341	"K16224,K13430"	Organismal Systems	Environmental adaptation	04626 Plant-pathogen interaction
Cluster_18345	"K13420,K01183,K13429,K13457,K00276,K13415,K18873,K13417,K13459,K13412,K13436,K16224,K14500,K04368,K13416,K14510"	Organismal Systems	Environmental adaptation	04626 Plant-pathogen interaction
Cluster_18349	"K01689,K03021,K13434,K14516"	Organismal Systems	Environmental adaptation	04626 Plant-pathogen interaction
Cluster_18418	"K13412,K16224"	Organismal Systems	Environmental adaptation	04626 Plant-pathogen interaction
Cluster_18527	"K02920,K13415,K13420"	Organismal Systems	Environmental adaptation	04626 Plant-pathogen interaction
Cluster_18554	"K09422,K16166,K02259"	Organismal Systems	Environmental adaptation	04626 Plant-pathogen interaction
Cluster_1857	K13430	Organismal Systems	Environmental adaptation	04626 Plant-pathogen interaction
Cluster_18623	"K13425,K13424"	Organismal Systems	Environmental adaptation	04626 Plant-pathogen interaction
Cluster_18625	"K14512,K04371"	Organismal Systems	Environmental adaptation	04626 Plant-pathogen interaction
Cluster_18627	"K02183,K07466,K14309,K05349,K16226,K08852,K03283,K01115,K04646,K13414"	Organismal Systems	Environmental adaptation	04626 Plant-pathogen interaction
Cluster_18628	"K13416,K01183"	Organismal Systems	Environmental adaptation	04626 Plant-pathogen interaction
Cluster_18683	"K13416,K01183"	Organismal Systems	Environmental adaptation	04626 Plant-pathogen interaction
Cluster_18693	K13412	Organismal Systems	Environmental adaptation	04626 Plant-pathogen interaction
Cluster_18737	"K16166,K02259,K09422"	Organismal Systems	Environmental adaptation	04626 Plant-pathogen interaction
Cluster_18738	"K13415,K13416"	Organismal Systems	Environmental adaptation	04626 Plant-pathogen interaction
Cluster_18868	K13424	Organismal Systems	Environmental adaptation	04626 Plant-pathogen interaction
Cluster_18892	K13412	Organismal Systems	Environmental adaptation	04626 Plant-pathogen interaction
Cluster_18893	"K13429,K13430,K16224"	Organismal Systems	Environmental adaptation	04626 Plant-pathogen interaction
Cluster_18938	"K13434,K03021,K14516,K14517,K01689"	Organismal Systems	Environmental adaptation	04626 Plant-pathogen interaction
Cluster_1897	"K13434,K14516"	Organismal Systems	Environmental adaptation	04626 Plant-pathogen interaction
Cluster_19027	K04371	Organismal Systems	Environmental adaptation	04626 Plant-pathogen interaction
Cluster_19053	"K13457,K00901"	Organismal Systems	Environmental adaptation	04626 Plant-pathogen interaction
Cluster_19073	K04368	Organismal Systems	Environmental adaptation	04626 Plant-pathogen interaction
Cluster_19158	"K05349,K14309,K07466,K02183,K13414,K04646,K01115,K03283,K16226,K08852"	Organismal Systems	Environmental adaptation	04626 Plant-pathogen interaction
Cluster_19194	"K03021,K13434,K14516,K14517"	Organismal Systems	Environmental adaptation	04626 Plant-pathogen interaction
Cluster_1922	"K13415,K13429,K13420,K16224,K13436,K13459"	Organismal Systems	Environmental adaptation	04626 Plant-pathogen interaction
Cluster_19223	"K09422,K16166,K02259"	Organismal Systems	Environmental adaptation	04626 Plant-pathogen interaction
Cluster_1923	"K13416,K13459,K13430"	Organismal Systems	Environmental adaptation	04626 Plant-pathogen interaction
Cluster_19277	K13430	Organismal Systems	Environmental adaptation	04626 Plant-pathogen interaction
Cluster_19290	"K14516,K13434,K13432,K03021,K13433,K14517"	Organismal Systems	Environmental adaptation	04626 Plant-pathogen interaction
Cluster_19295	"K14512,K04371"	Organismal Systems	Environmental adaptation	04626 Plant-pathogen interaction
Cluster_1932	"K13430,K16224"	Organismal Systems	Environmental adaptation	04626 Plant-pathogen interaction
Cluster_19329	K13414	Organismal Systems	Environmental adaptation	04626 Plant-pathogen interaction
Cluster_19387	"K03243,K12811,K11984,K13459"	Organismal Systems	Environmental adaptation	04626 Plant-pathogen interaction
Cluster_19439	"K14517,K13432,K13433,K14516"	Organismal Systems	Environmental adaptation	04626 Plant-pathogen interaction
Cluster_19452	"K13430,K13415"	Organismal Systems	Environmental adaptation	04626 Plant-pathogen interaction
Cluster_19455	K13448	Organismal Systems	Environmental adaptation	04626 Plant-pathogen interaction
Cluster_195	"K17982,K14760,K03283,K01623,K12619,K01876,K01209,K02350,K01006,K01191,K03136,K14416,K00654,K05658,K07198,K12741,K13420,K12882,K14489,K04077,K14539,K01456,K00559"	Organismal Systems	Environmental adaptation	04626 Plant-pathogen interaction
Cluster_19504	K13412	Organismal Systems	Environmental adaptation	04626 Plant-pathogen interaction
Cluster_19505	K09487	Organismal Systems	Environmental adaptation	04626 Plant-pathogen interaction
Cluster_19510	"K14517,K14516,K13434"	Organismal Systems	Environmental adaptation	04626 Plant-pathogen interaction
Cluster_19516	K12795	Organismal Systems	Environmental adaptation	04626 Plant-pathogen interaction
Cluster_1952	"K02183,K13420,K13459,K08852,K16226,K03283,K16225"	Organismal Systems	Environmental adaptation	04626 Plant-pathogen interaction
Cluster_19561	"K13423,K13424,K18835,K13425,K18834"	Organismal Systems	Environmental adaptation	04626 Plant-pathogen interaction
Cluster_19573	"K13432,K03021,K13434,K14516"	Organismal Systems	Environmental adaptation	04626 Plant-pathogen interaction
Cluster_19725	"K09422,K16166,K02259"	Organismal Systems	Environmental adaptation	04626 Plant-pathogen interaction
Cluster_19731	"K13436,K13430,K18873"	Organismal Systems	Environmental adaptation	04626 Plant-pathogen interaction
Cluster_19758	K13412	Organismal Systems	Environmental adaptation	04626 Plant-pathogen interaction
Cluster_1978	"K12608,K13430"	Organismal Systems	Environmental adaptation	04626 Plant-pathogen interaction
Cluster_19785	"K13434,K13432,K13433,K03021,K14516,K14517"	Organismal Systems	Environmental adaptation	04626 Plant-pathogen interaction
Cluster_19833	"K02183,K07466,K14309,K05349,K16226,K08852,K03283,K01115,K04646,K13414"	Organismal Systems	Environmental adaptation	04626 Plant-pathogen interaction
Cluster_1992	K18875	Organismal Systems	Environmental adaptation	04626 Plant-pathogen interaction
Cluster_19927	"K05349,K14309,K07466,K02183,K04646,K01115,K13414,K03283,K08852,K16226"	Organismal Systems	Environmental adaptation	04626 Plant-pathogen interaction
Cluster_19943	K05391	Organismal Systems	Environmental adaptation	04626 Plant-pathogen interaction
Cluster_19945	K13449	Organismal Systems	Environmental adaptation	04626 Plant-pathogen interaction
Cluster_19966	"K13432,K13433,K14516,K14517"	Organismal Systems	Environmental adaptation	04626 Plant-pathogen interaction
Cluster_2002	"K03083,K04371"	Organismal Systems	Environmental adaptation	04626 Plant-pathogen interaction
Cluster_20027	"K13420,K02146,K13415"	Organismal Systems	Environmental adaptation	04626 Plant-pathogen interaction
Cluster_20056	K13448	Organismal Systems	Environmental adaptation	04626 Plant-pathogen interaction
Cluster_2007	"K13457,K17982"	Organismal Systems	Environmental adaptation	04626 Plant-pathogen interaction
Cluster_20082	"K04373,K05391,K13414"	Organismal Systems	Environmental adaptation	04626 Plant-pathogen interaction
Cluster_20096	"K02259,K16166,K09422"	Organismal Systems	Environmental adaptation	04626 Plant-pathogen interaction
Cluster_20099	"K02183,K13412"	Organismal Systems	Environmental adaptation	04626 Plant-pathogen interaction
Cluster_20124	K18880	Organismal Systems	Environmental adaptation	04626 Plant-pathogen interaction
Cluster_20178	"K14516,K13434,K03021"	Organismal Systems	Environmental adaptation	04626 Plant-pathogen interaction
Cluster_20206	"K13430,K18873"	Organismal Systems	Environmental adaptation	04626 Plant-pathogen interaction
Cluster_20258	"K00847,K04368"	Organismal Systems	Environmental adaptation	04626 Plant-pathogen interaction
Cluster_20283	"K13415,K13430,K01183,K13459,K13416"	Organismal Systems	Environmental adaptation	04626 Plant-pathogen interaction
Cluster_20319	"K14516,K13434,K03021"	Organismal Systems	Environmental adaptation	04626 Plant-pathogen interaction
Cluster_20333	"K13415,K13420,K13428,K13466"	Organismal Systems	Environmental adaptation	04626 Plant-pathogen interaction
Cluster_2034	"K13416,K01183,K01176"	Organismal Systems	Environmental adaptation	04626 Plant-pathogen interaction
Cluster_20341	"K02259,K16166,K09422"	Organismal Systems	Environmental adaptation	04626 Plant-pathogen interaction
Cluster_20455	K18835	Organismal Systems	Environmental adaptation	04626 Plant-pathogen interaction
Cluster_20473	K13412	Organismal Systems	Environmental adaptation	04626 Plant-pathogen interaction
Cluster_20527	"K14512,K04371"	Organismal Systems	Environmental adaptation	04626 Plant-pathogen interaction
Cluster_20550	"K13420,K13416,K01188"	Organismal Systems	Environmental adaptation	04626 Plant-pathogen interaction
Cluster_20570	K13412	Organismal Systems	Environmental adaptation	04626 Plant-pathogen interaction
Cluster_206	K13414	Organismal Systems	Environmental adaptation	04626 Plant-pathogen interaction
Cluster_2066	"K14512,K07198,K02918,K03097,K02202,K13412,K04371"	Organismal Systems	Environmental adaptation	04626 Plant-pathogen interaction
Cluster_2068	"K13420,K13415"	Organismal Systems	Environmental adaptation	04626 Plant-pathogen interaction
Cluster_20693	"K15777,K13459"	Organismal Systems	Environmental adaptation	04626 Plant-pathogen interaction
Cluster_20724	"K16226,K08852,K01115,K04646,K13414,K03283,K07466,K02183,K05349,K14309"	Organismal Systems	Environmental adaptation	04626 Plant-pathogen interaction
Cluster_20745	K04079	Organismal Systems	Environmental adaptation	04626 Plant-pathogen interaction
Cluster_2077	"K03283,K16226,K02905"	Organismal Systems	Environmental adaptation	04626 Plant-pathogen interaction
Cluster_20803	"K13415,K13430,K01183,K01176"	Organismal Systems	Environmental adaptation	04626 Plant-pathogen interaction
Cluster_20815	"K01183,K13415,K13416"	Organismal Systems	Environmental adaptation	04626 Plant-pathogen interaction
Cluster_20844	K18875	Organismal Systems	Environmental adaptation	04626 Plant-pathogen interaction
Cluster_20880	"K13436,K18873,K13430"	Organismal Systems	Environmental adaptation	04626 Plant-pathogen interaction
Cluster_20893	"K13420,K02146,K13466,K13415"	Organismal Systems	Environmental adaptation	04626 Plant-pathogen interaction
Cluster_20914	"K03283,K01115,K04646,K13414,K08852,K16226,K14309,K05349,K02183,K07466"	Organismal Systems	Environmental adaptation	04626 Plant-pathogen interaction
Cluster_20990	"K00847,K04368"	Organismal Systems	Environmental adaptation	04626 Plant-pathogen interaction
Cluster_21	"K15086,K05605,K01191,K16196,K05666,K10599,K13457,K01689,K13356,K12819,K01738,K03062,K14513,K05756,K00566"	Organismal Systems	Environmental adaptation	04626 Plant-pathogen interaction
Cluster_21003	"K12795,K09561"	Organismal Systems	Environmental adaptation	04626 Plant-pathogen interaction
Cluster_21007	"K09422,K16166,K02259"	Organismal Systems	Environmental adaptation	04626 Plant-pathogen interaction
Cluster_21022	K18835	Organismal Systems	Environmental adaptation	04626 Plant-pathogen interaction
Cluster_21103	"K09422,K16166,K02259"	Organismal Systems	Environmental adaptation	04626 Plant-pathogen interaction
Cluster_21150	"K01183,K13416"	Organismal Systems	Environmental adaptation	04626 Plant-pathogen interaction
Cluster_21156	"K03283,K16225,K16226,K08852,K16911,K13459,K00514,K13457,K04706"	Organismal Systems	Environmental adaptation	04626 Plant-pathogen interaction
Cluster_21158	"K13459,K13430,K13460"	Organismal Systems	Environmental adaptation	04626 Plant-pathogen interaction
Cluster_21162	"K14516,K03021,K13434,K14517"	Organismal Systems	Environmental adaptation	04626 Plant-pathogen interaction
Cluster_21186	K13448	Organismal Systems	Environmental adaptation	04626 Plant-pathogen interaction
Cluster_21256	K13412	Organismal Systems	Environmental adaptation	04626 Plant-pathogen interaction
Cluster_21261	K02183	Organismal Systems	Environmental adaptation	04626 Plant-pathogen interaction
Cluster_21280	"K02259,K16166,K09422"	Organismal Systems	Environmental adaptation	04626 Plant-pathogen interaction
Cluster_21287	"K18834,K13425,K13426,K13424"	Organismal Systems	Environmental adaptation	04626 Plant-pathogen interaction
Cluster_21314	K12795	Organismal Systems	Environmental adaptation	04626 Plant-pathogen interaction
Cluster_21324	"K02146,K13420,K13415"	Organismal Systems	Environmental adaptation	04626 Plant-pathogen interaction
Cluster_2135	"K13420,K13428"	Organismal Systems	Environmental adaptation	04626 Plant-pathogen interaction
Cluster_2140	"K13429,K13415,K13430,K13416,K13436"	Organismal Systems	Environmental adaptation	04626 Plant-pathogen interaction
Cluster_21409	"K03083,K02202,K04371"	Organismal Systems	Environmental adaptation	04626 Plant-pathogen interaction
Cluster_21430	K13456	Organismal Systems	Environmental adaptation	04626 Plant-pathogen interaction
Cluster_21450	K09487	Organismal Systems	Environmental adaptation	04626 Plant-pathogen interaction
Cluster_21472	"K13416,K13417"	Organismal Systems	Environmental adaptation	04626 Plant-pathogen interaction
Cluster_21477	"K13417,K13416"	Organismal Systems	Environmental adaptation	04626 Plant-pathogen interaction
Cluster_2155	"K13420,K13415,K13416"	Organismal Systems	Environmental adaptation	04626 Plant-pathogen interaction
Cluster_21575	K13459	Organismal Systems	Environmental adaptation	04626 Plant-pathogen interaction
Cluster_2160	"K13417,K01183,K13416"	Organismal Systems	Environmental adaptation	04626 Plant-pathogen interaction
Cluster_21616	"K13416,K13417,K13415,K13428,K13420"	Organismal Systems	Environmental adaptation	04626 Plant-pathogen interaction
Cluster_21622	"K13459,K18873,K13430,K01183"	Organismal Systems	Environmental adaptation	04626 Plant-pathogen interaction
Cluster_21638	K13416	Organismal Systems	Environmental adaptation	04626 Plant-pathogen interaction
Cluster_2168	K13430	Organismal Systems	Environmental adaptation	04626 Plant-pathogen interaction
Cluster_21715	"K14517,K14516,K13432"	Organismal Systems	Environmental adaptation	04626 Plant-pathogen interaction
Cluster_21744	"K13416,K16224,K13430,K13415"	Organismal Systems	Environmental adaptation	04626 Plant-pathogen interaction
Cluster_21760	K13430	Organismal Systems	Environmental adaptation	04626 Plant-pathogen interaction
Cluster_21782	"K18835,K13423,K13424"	Organismal Systems	Environmental adaptation	04626 Plant-pathogen interaction
Cluster_21797	"K13434,K03021,K14516,K14517"	Organismal Systems	Environmental adaptation	04626 Plant-pathogen interaction
Cluster_21843	"K13424,K18835,K18834"	Organismal Systems	Environmental adaptation	04626 Plant-pathogen interaction
Cluster_2185	"K13417,K13420,K13416"	Organismal Systems	Environmental adaptation	04626 Plant-pathogen interaction
Cluster_21850	K13412	Organismal Systems	Environmental adaptation	04626 Plant-pathogen interaction
Cluster_21853	"K13436,K13430"	Organismal Systems	Environmental adaptation	04626 Plant-pathogen interaction
Cluster_21860	"K13448,K02183"	Organismal Systems	Environmental adaptation	04626 Plant-pathogen interaction
Cluster_21861	"K13415,K13420,K13428,K01188"	Organismal Systems	Environmental adaptation	04626 Plant-pathogen interaction
Cluster_21870	"K13457,K01930"	Organismal Systems	Environmental adaptation	04626 Plant-pathogen interaction
Cluster_21871	"K13412,K14758,K07198,K06276"	Organismal Systems	Environmental adaptation	04626 Plant-pathogen interaction
Cluster_2191	"K01183,K13430"	Organismal Systems	Environmental adaptation	04626 Plant-pathogen interaction
Cluster_21995	"K04371,K14512"	Organismal Systems	Environmental adaptation	04626 Plant-pathogen interaction
Cluster_22	"K05756,K00566,K12819,K01738,K05666,K10599,K13356,K13457,K15086,K05605,K01191,K16196"	Organismal Systems	Environmental adaptation	04626 Plant-pathogen interaction
Cluster_22048	"K13428,K13420,K13415"	Organismal Systems	Environmental adaptation	04626 Plant-pathogen interaction
Cluster_22066	K12795	Organismal Systems	Environmental adaptation	04626 Plant-pathogen interaction
Cluster_22154	K13448	Organismal Systems	Environmental adaptation	04626 Plant-pathogen interaction
Cluster_22169	K13459	Organismal Systems	Environmental adaptation	04626 Plant-pathogen interaction
Cluster_22310	"K14517,K13432,K13433,K14516"	Organismal Systems	Environmental adaptation	04626 Plant-pathogen interaction
Cluster_22324	K13412	Organismal Systems	Environmental adaptation	04626 Plant-pathogen interaction
Cluster_22360	K05391	Organismal Systems	Environmental adaptation	04626 Plant-pathogen interaction
Cluster_224	"K17982,K08503,K04079,K08081,K00815,K01251,K07466,K12489,K05391,K03243,K14497,K12616"	Organismal Systems	Environmental adaptation	04626 Plant-pathogen interaction
Cluster_22512	"K13436,K13416,K13430,K13415"	Organismal Systems	Environmental adaptation	04626 Plant-pathogen interaction
Cluster_22528	K13456	Organismal Systems	Environmental adaptation	04626 Plant-pathogen interaction
Cluster_22531	"K13426,K13425,K18835,K16225,K18834,K13424"	Organismal Systems	Environmental adaptation	04626 Plant-pathogen interaction
Cluster_22535	K13448	Organismal Systems	Environmental adaptation	04626 Plant-pathogen interaction
Cluster_22562	K13412	Organismal Systems	Environmental adaptation	04626 Plant-pathogen interaction
Cluster_22567	K18875	Organismal Systems	Environmental adaptation	04626 Plant-pathogen interaction
Cluster_22583	"K13432,K13433,K14516,K14517"	Organismal Systems	Environmental adaptation	04626 Plant-pathogen interaction
Cluster_22624	K02183	Organismal Systems	Environmental adaptation	04626 Plant-pathogen interaction
Cluster_22680	"K13416,K13420"	Organismal Systems	Environmental adaptation	04626 Plant-pathogen interaction
Cluster_22716	"K13415,K13428,K13420"	Organismal Systems	Environmental adaptation	04626 Plant-pathogen interaction
Cluster_22728	"K13434,K14516"	Organismal Systems	Environmental adaptation	04626 Plant-pathogen interaction
Cluster_22736	"K13425,K13426"	Organismal Systems	Environmental adaptation	04626 Plant-pathogen interaction
Cluster_22802	"K13415,K13420,K13428,K01886"	Organismal Systems	Environmental adaptation	04626 Plant-pathogen interaction
Cluster_22807	"K14517,K13432,K13434,K14516"	Organismal Systems	Environmental adaptation	04626 Plant-pathogen interaction
Cluster_22867	"K13417,K05349,K01183,K13416,K16911"	Organismal Systems	Environmental adaptation	04626 Plant-pathogen interaction
Cluster_22897	"K14517,K14516,K03021,K13432,K13434"	Organismal Systems	Environmental adaptation	04626 Plant-pathogen interaction
Cluster_22967	"K02259,K16166,K09422,K12598"	Organismal Systems	Environmental adaptation	04626 Plant-pathogen interaction
Cluster_2300	"K13457,K12795"	Organismal Systems	Environmental adaptation	04626 Plant-pathogen interaction
Cluster_23113	"K13420,K01183,K13429,K13415,K13436"	Organismal Systems	Environmental adaptation	04626 Plant-pathogen interaction
Cluster_23141	"K13430,K13429,K13459,K16224"	Organismal Systems	Environmental adaptation	04626 Plant-pathogen interaction
Cluster_23155	"K18834,K18835,K13424"	Organismal Systems	Environmental adaptation	04626 Plant-pathogen interaction
Cluster_23176	"K13412,K14758"	Organismal Systems	Environmental adaptation	04626 Plant-pathogen interaction
Cluster_23206	"K14513,K09833,K12819,K13457,K13356,K15086"	Organismal Systems	Environmental adaptation	04626 Plant-pathogen interaction
Cluster_23214	K13412	Organismal Systems	Environmental adaptation	04626 Plant-pathogen interaction
Cluster_23226	K13436	Organismal Systems	Environmental adaptation	04626 Plant-pathogen interaction
Cluster_23247	"K01183,K13430,K18873,K13436,K13416"	Organismal Systems	Environmental adaptation	04626 Plant-pathogen interaction
Cluster_23256	"K13415,K13420,K13428,K02146,K13416"	Organismal Systems	Environmental adaptation	04626 Plant-pathogen interaction
Cluster_23297	"K13434,K03021,K13432,K14516,K14517"	Organismal Systems	Environmental adaptation	04626 Plant-pathogen interaction
Cluster_233	"K05349,K14309,K07466,K02183,K01115,K13414,K16225,K03283,K16911,K08852,K16226"	Organismal Systems	Environmental adaptation	04626 Plant-pathogen interaction
Cluster_2333	"K12118,K12119,K02183"	Organismal Systems	Environmental adaptation	04626 Plant-pathogen interaction
Cluster_2342	K13420	Organismal Systems	Environmental adaptation	04626 Plant-pathogen interaction
Cluster_2346	K13457	Organismal Systems	Environmental adaptation	04626 Plant-pathogen interaction
Cluster_23473	K16226	Organismal Systems	Environmental adaptation	04626 Plant-pathogen interaction
Cluster_23487	K13434	Organismal Systems	Environmental adaptation	04626 Plant-pathogen interaction
Cluster_235	"K13430,K03238,K16224"	Organismal Systems	Environmental adaptation	04626 Plant-pathogen interaction
Cluster_23513	K13430	Organismal Systems	Environmental adaptation	04626 Plant-pathogen interaction
Cluster_23623	"K01183,K13430,K07375"	Organismal Systems	Environmental adaptation	04626 Plant-pathogen interaction
Cluster_2364	"K13416,K13415,K13420,K13417"	Organismal Systems	Environmental adaptation	04626 Plant-pathogen interaction
Cluster_23679	"K16166,K02259,K09422"	Organismal Systems	Environmental adaptation	04626 Plant-pathogen interaction
Cluster_23685	"K09422,K02259,K16166"	Organismal Systems	Environmental adaptation	04626 Plant-pathogen interaction
Cluster_2372	"K04079,K01889,K01915"	Organismal Systems	Environmental adaptation	04626 Plant-pathogen interaction
Cluster_23734	"K14516,K13434,K14486,K01689"	Organismal Systems	Environmental adaptation	04626 Plant-pathogen interaction
Cluster_23768	"K04646,K01115,K13414,K03283,K16911,K16226,K08852,K05349,K14309,K07466,K02183"	Organismal Systems	Environmental adaptation	04626 Plant-pathogen interaction
Cluster_23797	K02183	Organismal Systems	Environmental adaptation	04626 Plant-pathogen interaction
Cluster_23828	K18875	Organismal Systems	Environmental adaptation	04626 Plant-pathogen interaction
Cluster_23840	"K13417,K13416"	Organismal Systems	Environmental adaptation	04626 Plant-pathogen interaction
Cluster_23860	"K13423,K13424"	Organismal Systems	Environmental adaptation	04626 Plant-pathogen interaction
Cluster_23881	K13457	Organismal Systems	Environmental adaptation	04626 Plant-pathogen interaction
Cluster_239	"K01183,K00276,K13430,K13416"	Organismal Systems	Environmental adaptation	04626 Plant-pathogen interaction
Cluster_2390	"K14516,K13432,K13433,K14517"	Organismal Systems	Environmental adaptation	04626 Plant-pathogen interaction
Cluster_23958	"K13415,K13420,K13416"	Organismal Systems	Environmental adaptation	04626 Plant-pathogen interaction
Cluster_23973	"K14516,K13433,K13434"	Organismal Systems	Environmental adaptation	04626 Plant-pathogen interaction
Cluster_24013	"K13459,K13416,K13430,K01183"	Organismal Systems	Environmental adaptation	04626 Plant-pathogen interaction
Cluster_24026	"K13412,K14758"	Organismal Systems	Environmental adaptation	04626 Plant-pathogen interaction
Cluster_24061	"K14517,K14516,K13432"	Organismal Systems	Environmental adaptation	04626 Plant-pathogen interaction
Cluster_24142	"K14517,K13434,K13433,K03021,K13432,K14516"	Organismal Systems	Environmental adaptation	04626 Plant-pathogen interaction
Cluster_24146	"K14517,K14516,K13434,K13432,K03021"	Organismal Systems	Environmental adaptation	04626 Plant-pathogen interaction
Cluster_24166	"K14516,K13432,K13434,K14517"	Organismal Systems	Environmental adaptation	04626 Plant-pathogen interaction
Cluster_24194	"K13417,K13416"	Organismal Systems	Environmental adaptation	04626 Plant-pathogen interaction
Cluster_24301	"K16166,K02259,K09422"	Organismal Systems	Environmental adaptation	04626 Plant-pathogen interaction
Cluster_24307	"K14517,K13433,K13432,K13434,K14516"	Organismal Systems	Environmental adaptation	04626 Plant-pathogen interaction
Cluster_24394	"K02183,K07466,K14309,K05349,K16911,K16226,K08852,K16225,K03283,K13414,K01115"	Organismal Systems	Environmental adaptation	04626 Plant-pathogen interaction
Cluster_24402	"K13434,K14516"	Organismal Systems	Environmental adaptation	04626 Plant-pathogen interaction
Cluster_24425	"K13436,K16224,K13430"	Organismal Systems	Environmental adaptation	04626 Plant-pathogen interaction
Cluster_24462	"K13430,K13436"	Organismal Systems	Environmental adaptation	04626 Plant-pathogen interaction
Cluster_2448	K13448	Organismal Systems	Environmental adaptation	04626 Plant-pathogen interaction
Cluster_24510	"K04079,K01915"	Organismal Systems	Environmental adaptation	04626 Plant-pathogen interaction
Cluster_24519	K14512	Organismal Systems	Environmental adaptation	04626 Plant-pathogen interaction
Cluster_2453	"K14512,K04371"	Organismal Systems	Environmental adaptation	04626 Plant-pathogen interaction
Cluster_24542	K13430	Organismal Systems	Environmental adaptation	04626 Plant-pathogen interaction
Cluster_24544	K13412	Organismal Systems	Environmental adaptation	04626 Plant-pathogen interaction
Cluster_24577	K13436	Organismal Systems	Environmental adaptation	04626 Plant-pathogen interaction
Cluster_24639	"K14516,K13432,K03021,K13434,K14517"	Organismal Systems	Environmental adaptation	04626 Plant-pathogen interaction
Cluster_24711	"K01689,K13434,K03021,K14516"	Organismal Systems	Environmental adaptation	04626 Plant-pathogen interaction
Cluster_2472	"K13457,K14309,K13459,K16911,K16226,K08852,K03283,K16225"	Organismal Systems	Environmental adaptation	04626 Plant-pathogen interaction
Cluster_24725	"K13436,K16224,K13416,K13429,K13430,K13417"	Organismal Systems	Environmental adaptation	04626 Plant-pathogen interaction
Cluster_24756	"K08852,K16226,K13414,K03283,K07466,K02183,K05349,K13448,K14309"	Organismal Systems	Environmental adaptation	04626 Plant-pathogen interaction
Cluster_24811	"K16166,K02259,K14317,K09422"	Organismal Systems	Environmental adaptation	04626 Plant-pathogen interaction
Cluster_24848	"K13436,K13430,K13415"	Organismal Systems	Environmental adaptation	04626 Plant-pathogen interaction
Cluster_2489	"K04368,K13414,K14510"	Organismal Systems	Environmental adaptation	04626 Plant-pathogen interaction
Cluster_24896	K18880	Organismal Systems	Environmental adaptation	04626 Plant-pathogen interaction
Cluster_2495	"K13424,K13425"	Organismal Systems	Environmental adaptation	04626 Plant-pathogen interaction
Cluster_24988	"K14516,K13433,K13434,K01689"	Organismal Systems	Environmental adaptation	04626 Plant-pathogen interaction
Cluster_250	"K13414,K12897,K04368,K04688,K07198,K06276,K12489"	Organismal Systems	Environmental adaptation	04626 Plant-pathogen interaction
Cluster_25088	"K14516,K13434,K03021,K14517"	Organismal Systems	Environmental adaptation	04626 Plant-pathogen interaction
Cluster_25103	K02183	Organismal Systems	Environmental adaptation	04626 Plant-pathogen interaction
Cluster_2512	"K13415,K13420,K13416"	Organismal Systems	Environmental adaptation	04626 Plant-pathogen interaction
Cluster_25122	"K13430,K01183,K18873"	Organismal Systems	Environmental adaptation	04626 Plant-pathogen interaction
Cluster_25130	"K13417,K13416"	Organismal Systems	Environmental adaptation	04626 Plant-pathogen interaction
Cluster_25138	"K13424,K18834,K18835"	Organismal Systems	Environmental adaptation	04626 Plant-pathogen interaction
Cluster_25161	"K13424,K18835,K18834"	Organismal Systems	Environmental adaptation	04626 Plant-pathogen interaction
Cluster_25170	"K13459,K16911,K08852,K16226,K03283,K16225,K13457,K00514,K14309"	Organismal Systems	Environmental adaptation	04626 Plant-pathogen interaction
Cluster_25194	"K13430,K18873"	Organismal Systems	Environmental adaptation	04626 Plant-pathogen interaction
Cluster_25206	"K13416,K13428,K13420,K13415"	Organismal Systems	Environmental adaptation	04626 Plant-pathogen interaction
Cluster_2521	K13414	Organismal Systems	Environmental adaptation	04626 Plant-pathogen interaction
Cluster_2529	K13430	Organismal Systems	Environmental adaptation	04626 Plant-pathogen interaction
Cluster_2532	"K13436,K13416,K13430,K13417,K01176,K18873"	Organismal Systems	Environmental adaptation	04626 Plant-pathogen interaction
Cluster_25344	"K14512,K04371"	Organismal Systems	Environmental adaptation	04626 Plant-pathogen interaction
Cluster_25387	"K01183,K13430,K13436,K13416,K03283"	Organismal Systems	Environmental adaptation	04626 Plant-pathogen interaction
Cluster_25403	"K16166,K12860,K02259,K09422"	Organismal Systems	Environmental adaptation	04626 Plant-pathogen interaction
Cluster_25405	"K16166,K02259,K12598,K09422"	Organismal Systems	Environmental adaptation	04626 Plant-pathogen interaction
Cluster_25407	K13457	Organismal Systems	Environmental adaptation	04626 Plant-pathogen interaction
Cluster_25427	"K14516,K13434,K13432,K13433,K03021,K14517"	Organismal Systems	Environmental adaptation	04626 Plant-pathogen interaction
Cluster_25444	"K13459,K13415,K13430"	Organismal Systems	Environmental adaptation	04626 Plant-pathogen interaction
Cluster_25447	"K14309,K05349,K02183,K07466,K16225,K03283,K13414,K01115,K08852,K16226"	Organismal Systems	Environmental adaptation	04626 Plant-pathogen interaction
Cluster_25550	K13412	Organismal Systems	Environmental adaptation	04626 Plant-pathogen interaction
Cluster_2561	"K13416,K13459,K01183"	Organismal Systems	Environmental adaptation	04626 Plant-pathogen interaction
Cluster_25649	K13425	Organismal Systems	Environmental adaptation	04626 Plant-pathogen interaction
Cluster_25673	K13430	Organismal Systems	Environmental adaptation	04626 Plant-pathogen interaction
Cluster_25701	"K09422,K02259,K16166"	Organismal Systems	Environmental adaptation	04626 Plant-pathogen interaction
Cluster_25709	K13430	Organismal Systems	Environmental adaptation	04626 Plant-pathogen interaction
Cluster_25823	"K13412,K02183,K13510"	Organismal Systems	Environmental adaptation	04626 Plant-pathogen interaction
Cluster_25867	"K01886,K13420,K13428,K13415"	Organismal Systems	Environmental adaptation	04626 Plant-pathogen interaction
Cluster_25871	"K13430,K01183,K13417,K13416,K03283"	Organismal Systems	Environmental adaptation	04626 Plant-pathogen interaction
Cluster_2595	"K14517,K14516,K13433,K13432"	Organismal Systems	Environmental adaptation	04626 Plant-pathogen interaction
Cluster_2597	"K16224,K13436,K13430,K13429,K18873"	Organismal Systems	Environmental adaptation	04626 Plant-pathogen interaction
Cluster_25982	"K14517,K13432,K13433,K14516"	Organismal Systems	Environmental adaptation	04626 Plant-pathogen interaction
Cluster_26001	K13416	Organismal Systems	Environmental adaptation	04626 Plant-pathogen interaction
Cluster_2610	"K13460,K13459"	Organismal Systems	Environmental adaptation	04626 Plant-pathogen interaction
Cluster_26126	"K14517,K14516,K03021,K13433,K13432,K13434"	Organismal Systems	Environmental adaptation	04626 Plant-pathogen interaction
Cluster_262	"K17982,K07466,K01251,K08081,K04079,K15402,K08503,K12616,K14497,K03243,K12489,K05391"	Organismal Systems	Environmental adaptation	04626 Plant-pathogen interaction
Cluster_26207	"K16166,K02259,K09422"	Organismal Systems	Environmental adaptation	04626 Plant-pathogen interaction
Cluster_2628	"K13430,K01183,K13416"	Organismal Systems	Environmental adaptation	04626 Plant-pathogen interaction
Cluster_26407	K05391	Organismal Systems	Environmental adaptation	04626 Plant-pathogen interaction
Cluster_26489	"K16166,K02259,K12860,K09422"	Organismal Systems	Environmental adaptation	04626 Plant-pathogen interaction
Cluster_26595	K18835	Organismal Systems	Environmental adaptation	04626 Plant-pathogen interaction
Cluster_26628	"K14517,K13432,K14516"	Organismal Systems	Environmental adaptation	04626 Plant-pathogen interaction
Cluster_2665	"K00850,K12819,K09754,K12153,K05658,K01191,K18819,K02516,K03469,K13356,K13457,K01051,K10599"	Organismal Systems	Environmental adaptation	04626 Plant-pathogen interaction
Cluster_2670	K13447	Organismal Systems	Environmental adaptation	04626 Plant-pathogen interaction
Cluster_26722	"K14516,K13434,K03021,K14517"	Organismal Systems	Environmental adaptation	04626 Plant-pathogen interaction
Cluster_26727	"K03283,K13430,K01183"	Organismal Systems	Environmental adaptation	04626 Plant-pathogen interaction
Cluster_2674	"K13457,K13459"	Organismal Systems	Environmental adaptation	04626 Plant-pathogen interaction
Cluster_26793	"K03021,K13434,K14516,K01689"	Organismal Systems	Environmental adaptation	04626 Plant-pathogen interaction
Cluster_2680	K13459	Organismal Systems	Environmental adaptation	04626 Plant-pathogen interaction
Cluster_26800	"K13430,K13415,K13416"	Organismal Systems	Environmental adaptation	04626 Plant-pathogen interaction
Cluster_26811	"K13430,K13436,K16224"	Organismal Systems	Environmental adaptation	04626 Plant-pathogen interaction
Cluster_26953	"K13424,K18834,K18835"	Organismal Systems	Environmental adaptation	04626 Plant-pathogen interaction
Cluster_26962	K13412	Organismal Systems	Environmental adaptation	04626 Plant-pathogen interaction
Cluster_2707	"K16224,K13430,K13429"	Organismal Systems	Environmental adaptation	04626 Plant-pathogen interaction
Cluster_27073	"K13430,K01183,K03283,K13416,K13436"	Organismal Systems	Environmental adaptation	04626 Plant-pathogen interaction
Cluster_2709	"K14512,K02202,K04371"	Organismal Systems	Environmental adaptation	04626 Plant-pathogen interaction
Cluster_27122	"K13415,K13416"	Organismal Systems	Environmental adaptation	04626 Plant-pathogen interaction
Cluster_27198	"K09422,K16166,K02259"	Organismal Systems	Environmental adaptation	04626 Plant-pathogen interaction
Cluster_27300	"K03021,K13434,K14516,K14517,K01689"	Organismal Systems	Environmental adaptation	04626 Plant-pathogen interaction
Cluster_27340	K14512	Organismal Systems	Environmental adaptation	04626 Plant-pathogen interaction
Cluster_27343	K13448	Organismal Systems	Environmental adaptation	04626 Plant-pathogen interaction
Cluster_27352	"K14516,K13432,K03021,K13433,K13434,K14517"	Organismal Systems	Environmental adaptation	04626 Plant-pathogen interaction
Cluster_27359	K13456	Organismal Systems	Environmental adaptation	04626 Plant-pathogen interaction
Cluster_2739	"K14510,K02202,K08269,K04371,K13412,K06276,K05391,K07198"	Organismal Systems	Environmental adaptation	04626 Plant-pathogen interaction
Cluster_27404	"K16225,K03283,K08852"	Organismal Systems	Environmental adaptation	04626 Plant-pathogen interaction
Cluster_2745	"K13417,K18873,K01183,K13416,K13459"	Organismal Systems	Environmental adaptation	04626 Plant-pathogen interaction
Cluster_27458	K12795	Organismal Systems	Environmental adaptation	04626 Plant-pathogen interaction
Cluster_2751	"K16224,K11433,K13459,K13429,K13415"	Organismal Systems	Environmental adaptation	04626 Plant-pathogen interaction
Cluster_27519	"K12598,K09422,K16166,K02259"	Organismal Systems	Environmental adaptation	04626 Plant-pathogen interaction
Cluster_27542	"K13423,K13424,K18835,K18834"	Organismal Systems	Environmental adaptation	04626 Plant-pathogen interaction
Cluster_2761	K13414	Organismal Systems	Environmental adaptation	04626 Plant-pathogen interaction
Cluster_27649	K02183	Organismal Systems	Environmental adaptation	04626 Plant-pathogen interaction
Cluster_27671	K13448	Organismal Systems	Environmental adaptation	04626 Plant-pathogen interaction
Cluster_27714	"K01188,K13420,K13428,K13415"	Organismal Systems	Environmental adaptation	04626 Plant-pathogen interaction
Cluster_2772	"K13429,K13415,K13430"	Organismal Systems	Environmental adaptation	04626 Plant-pathogen interaction
Cluster_27782	"K14517,K13434,K13432,K03021,K14516"	Organismal Systems	Environmental adaptation	04626 Plant-pathogen interaction
Cluster_27815	"K05349,K14309,K07466,K02183,K13414,K01115,K03283,K16225,K16911,K16226,K08852"	Organismal Systems	Environmental adaptation	04626 Plant-pathogen interaction
Cluster_27822	K09487	Organismal Systems	Environmental adaptation	04626 Plant-pathogen interaction
Cluster_27838	K13412	Organismal Systems	Environmental adaptation	04626 Plant-pathogen interaction
Cluster_27929	K13448	Organismal Systems	Environmental adaptation	04626 Plant-pathogen interaction
Cluster_27946	"K14517,K13433,K13432,K14516"	Organismal Systems	Environmental adaptation	04626 Plant-pathogen interaction
Cluster_2795	"K13430,K13416"	Organismal Systems	Environmental adaptation	04626 Plant-pathogen interaction
Cluster_2797	"K16224,K13416,K13430"	Organismal Systems	Environmental adaptation	04626 Plant-pathogen interaction
Cluster_28018	"K05356,K03136,K05658,K00430,K13420,K03644,K00559,K14760,K17982,K01188,K01876"	Organismal Systems	Environmental adaptation	04626 Plant-pathogen interaction
Cluster_28041	"K05607,K18880,K13238"	Organismal Systems	Environmental adaptation	04626 Plant-pathogen interaction
Cluster_2810	"K13460,K13459"	Organismal Systems	Environmental adaptation	04626 Plant-pathogen interaction
Cluster_28147	"K03083,K14512,K04371"	Organismal Systems	Environmental adaptation	04626 Plant-pathogen interaction
Cluster_2816	"K13416,K01183,K00276,K13417"	Organismal Systems	Environmental adaptation	04626 Plant-pathogen interaction
Cluster_28214	K13436	Organismal Systems	Environmental adaptation	04626 Plant-pathogen interaction
Cluster_28235	"K08852,K03283,K02183,K14309"	Organismal Systems	Environmental adaptation	04626 Plant-pathogen interaction
Cluster_2830	"K13126,K13459,K00162"	Organismal Systems	Environmental adaptation	04626 Plant-pathogen interaction
Cluster_28302	K16226	Organismal Systems	Environmental adaptation	04626 Plant-pathogen interaction
Cluster_2831	"K01930,K13457"	Organismal Systems	Environmental adaptation	04626 Plant-pathogen interaction
Cluster_2832	"K13460,K13459"	Organismal Systems	Environmental adaptation	04626 Plant-pathogen interaction
Cluster_2837	K13430	Organismal Systems	Environmental adaptation	04626 Plant-pathogen interaction
Cluster_28373	"K09422,K16166,K02259"	Organismal Systems	Environmental adaptation	04626 Plant-pathogen interaction
Cluster_2839	"K13415,K12489,K13416"	Organismal Systems	Environmental adaptation	04626 Plant-pathogen interaction
Cluster_2849	"K13416,K13415,K13420"	Organismal Systems	Environmental adaptation	04626 Plant-pathogen interaction
Cluster_28536	K02183	Organismal Systems	Environmental adaptation	04626 Plant-pathogen interaction
Cluster_28537	"K13424,K18835,K18834"	Organismal Systems	Environmental adaptation	04626 Plant-pathogen interaction
Cluster_28609	"K13430,K18873"	Organismal Systems	Environmental adaptation	04626 Plant-pathogen interaction
Cluster_28700	"K13424,K13425,K18835,K16225,K13426,K18834"	Organismal Systems	Environmental adaptation	04626 Plant-pathogen interaction
Cluster_28763	"K13466,K13420,K13415,K13417,K13416"	Organismal Systems	Environmental adaptation	04626 Plant-pathogen interaction
Cluster_28812	K13436	Organismal Systems	Environmental adaptation	04626 Plant-pathogen interaction
Cluster_2882	K05391	Organismal Systems	Environmental adaptation	04626 Plant-pathogen interaction
Cluster_28843	K13436	Organismal Systems	Environmental adaptation	04626 Plant-pathogen interaction
Cluster_289	"K16196,K01191,K02896,K15086,K13457,K13356,K01689,K02705,K01738,K12819,K14513"	Organismal Systems	Environmental adaptation	04626 Plant-pathogen interaction
Cluster_28935	"K13434,K03021,K14517"	Organismal Systems	Environmental adaptation	04626 Plant-pathogen interaction
Cluster_28951	"K13433,K03021,K13432,K13434,K14516,K14517"	Organismal Systems	Environmental adaptation	04626 Plant-pathogen interaction
Cluster_28994	"K13448,K02183"	Organismal Systems	Environmental adaptation	04626 Plant-pathogen interaction
Cluster_2902	"K17982,K03243,K12616,K14497,K05391,K12489,K01251,K07466,K04079,K08081"	Organismal Systems	Environmental adaptation	04626 Plant-pathogen interaction
Cluster_29119	"K01365,K01373"	Organismal Systems	Environmental adaptation	04626 Plant-pathogen interaction
Cluster_29141	"K14517,K13433,K13432,K14516"	Organismal Systems	Environmental adaptation	04626 Plant-pathogen interaction
Cluster_29198	"K13417,K13430,K13416,K13436,K16224"	Organismal Systems	Environmental adaptation	04626 Plant-pathogen interaction
Cluster_29322	"K13429,K13430,K13415"	Organismal Systems	Environmental adaptation	04626 Plant-pathogen interaction
Cluster_29381	"K14516,K13434,K03021,K01689"	Organismal Systems	Environmental adaptation	04626 Plant-pathogen interaction
Cluster_29401	"K01930,K13457"	Organismal Systems	Environmental adaptation	04626 Plant-pathogen interaction
Cluster_29428	"K13425,K16225"	Organismal Systems	Environmental adaptation	04626 Plant-pathogen interaction
Cluster_29471	"K01373,K01365"	Organismal Systems	Environmental adaptation	04626 Plant-pathogen interaction
Cluster_29485	K13448	Organismal Systems	Environmental adaptation	04626 Plant-pathogen interaction
Cluster_295	"K17982,K00006,K08503,K08081,K04079,K01251,K07466,K12489,K05391,K03243,K14497,K12616"	Organismal Systems	Environmental adaptation	04626 Plant-pathogen interaction
Cluster_2956	"K14309,K05349,K02183,K13457,K07466,K03283,K16225,K13414,K01115,K08852,K16226,K16911"	Organismal Systems	Environmental adaptation	04626 Plant-pathogen interaction
Cluster_29666	K13430	Organismal Systems	Environmental adaptation	04626 Plant-pathogen interaction
Cluster_2968	"K13420,K13466,K13415"	Organismal Systems	Environmental adaptation	04626 Plant-pathogen interaction
Cluster_29692	"K14517,K14516,K13432,K03021,K13433,K13434"	Organismal Systems	Environmental adaptation	04626 Plant-pathogen interaction
Cluster_29801	K13448	Organismal Systems	Environmental adaptation	04626 Plant-pathogen interaction
Cluster_29872	K16225	Organismal Systems	Environmental adaptation	04626 Plant-pathogen interaction
Cluster_2991	K13420	Organismal Systems	Environmental adaptation	04626 Plant-pathogen interaction
Cluster_29915	"K01183,K13430,K13459"	Organismal Systems	Environmental adaptation	04626 Plant-pathogen interaction
Cluster_29929	K13459	Organismal Systems	Environmental adaptation	04626 Plant-pathogen interaction
Cluster_29986	"K13434,K13432,K03021,K13433,K14516,K14517"	Organismal Systems	Environmental adaptation	04626 Plant-pathogen interaction
Cluster_3006	K13430	Organismal Systems	Environmental adaptation	04626 Plant-pathogen interaction
Cluster_301	"K00799,K02350,K01876,K00627,K12619,K07374,K14760,K01188,K03283,K01623,K12882,K04077,K03644,K14539,K07198,K13420,K01191,K05658"	Organismal Systems	Environmental adaptation	04626 Plant-pathogen interaction
Cluster_3011	K18875	Organismal Systems	Environmental adaptation	04626 Plant-pathogen interaction
Cluster_30136	"K14512,K04371"	Organismal Systems	Environmental adaptation	04626 Plant-pathogen interaction
Cluster_3014	"K13416,K13420,K13417"	Organismal Systems	Environmental adaptation	04626 Plant-pathogen interaction
Cluster_30149	K13436	Organismal Systems	Environmental adaptation	04626 Plant-pathogen interaction
Cluster_30236	"K13415,K13466,K13420,K13428,K13416"	Organismal Systems	Environmental adaptation	04626 Plant-pathogen interaction
Cluster_30242	K16226	Organismal Systems	Environmental adaptation	04626 Plant-pathogen interaction
Cluster_30266	K13459	Organismal Systems	Environmental adaptation	04626 Plant-pathogen interaction
Cluster_30337	"K16226,K08852,K03283,K13414,K01115,K02183,K07466,K14309,K05349"	Organismal Systems	Environmental adaptation	04626 Plant-pathogen interaction
Cluster_30351	K04079	Organismal Systems	Environmental adaptation	04626 Plant-pathogen interaction
Cluster_30378	K13436	Organismal Systems	Environmental adaptation	04626 Plant-pathogen interaction
Cluster_304	K05391	Organismal Systems	Environmental adaptation	04626 Plant-pathogen interaction
Cluster_3047	"K01176,K13417,K01183,K13416"	Organismal Systems	Environmental adaptation	04626 Plant-pathogen interaction
Cluster_3052	K13430	Organismal Systems	Environmental adaptation	04626 Plant-pathogen interaction
Cluster_30537	"K13436,K01183"	Organismal Systems	Environmental adaptation	04626 Plant-pathogen interaction
Cluster_30552	K16224	Organismal Systems	Environmental adaptation	04626 Plant-pathogen interaction
Cluster_30569	K13448	Organismal Systems	Environmental adaptation	04626 Plant-pathogen interaction
Cluster_30613	K13412	Organismal Systems	Environmental adaptation	04626 Plant-pathogen interaction
Cluster_30640	"K13126,K13459"	Organismal Systems	Environmental adaptation	04626 Plant-pathogen interaction
Cluster_3065	"K02183,K07466,K14309,K05349,K16226,K08852,K16225,K03283,K13414,K01115"	Organismal Systems	Environmental adaptation	04626 Plant-pathogen interaction
Cluster_3066	"K13428,K13420"	Organismal Systems	Environmental adaptation	04626 Plant-pathogen interaction
Cluster_30705	"K13436,K13430,K13429,K01183"	Organismal Systems	Environmental adaptation	04626 Plant-pathogen interaction
Cluster_3071	"K13420,K01183,K13429,K13415,K13430,K16224"	Organismal Systems	Environmental adaptation	04626 Plant-pathogen interaction
Cluster_30800	K13430	Organismal Systems	Environmental adaptation	04626 Plant-pathogen interaction
Cluster_30847	"K08852,K16226"	Organismal Systems	Environmental adaptation	04626 Plant-pathogen interaction
Cluster_30891	"K13436,K01183,K13430"	Organismal Systems	Environmental adaptation	04626 Plant-pathogen interaction
Cluster_30900	K13448	Organismal Systems	Environmental adaptation	04626 Plant-pathogen interaction
Cluster_30920	K13416	Organismal Systems	Environmental adaptation	04626 Plant-pathogen interaction
Cluster_30950	"K13428,K13420"	Organismal Systems	Environmental adaptation	04626 Plant-pathogen interaction
Cluster_3096	K05391	Organismal Systems	Environmental adaptation	04626 Plant-pathogen interaction
Cluster_31024	K02183	Organismal Systems	Environmental adaptation	04626 Plant-pathogen interaction
Cluster_311	"K01456,K04077,K14539,K12882,K13420,K13428,K12741,K07198,K05658,K02350,K00627,K01738,K12619,K03283,K01623,K07374,K04392"	Organismal Systems	Environmental adaptation	04626 Plant-pathogen interaction
Cluster_3110	"K08852,K13459,K03283,K16225"	Organismal Systems	Environmental adaptation	04626 Plant-pathogen interaction
Cluster_3111	"K13430,K13436"	Organismal Systems	Environmental adaptation	04626 Plant-pathogen interaction
Cluster_3112	K05391	Organismal Systems	Environmental adaptation	04626 Plant-pathogen interaction
Cluster_31172	K13412	Organismal Systems	Environmental adaptation	04626 Plant-pathogen interaction
Cluster_31176	"K13430,K13420,K13436,K13416"	Organismal Systems	Environmental adaptation	04626 Plant-pathogen interaction
Cluster_31283	"K13430,K01183,K13417,K18873,K13436,K03283,K13416"	Organismal Systems	Environmental adaptation	04626 Plant-pathogen interaction
Cluster_31319	K13416	Organismal Systems	Environmental adaptation	04626 Plant-pathogen interaction
Cluster_31324	"K02183,K13448"	Organismal Systems	Environmental adaptation	04626 Plant-pathogen interaction
Cluster_31329	K13436	Organismal Systems	Environmental adaptation	04626 Plant-pathogen interaction
Cluster_31331	"K13417,K13430,K13416,K13436,K16224"	Organismal Systems	Environmental adaptation	04626 Plant-pathogen interaction
Cluster_31347	K12795	Organismal Systems	Environmental adaptation	04626 Plant-pathogen interaction
Cluster_31366	"K14517,K13434,K03021,K14516"	Organismal Systems	Environmental adaptation	04626 Plant-pathogen interaction
Cluster_31427	K13412	Organismal Systems	Environmental adaptation	04626 Plant-pathogen interaction
Cluster_3148	"K13414,K14510"	Organismal Systems	Environmental adaptation	04626 Plant-pathogen interaction
Cluster_31581	K04079	Organismal Systems	Environmental adaptation	04626 Plant-pathogen interaction
Cluster_317	"K16224,K13430"	Organismal Systems	Environmental adaptation	04626 Plant-pathogen interaction
Cluster_3176	K13457	Organismal Systems	Environmental adaptation	04626 Plant-pathogen interaction
Cluster_31767	"K13415,K13420"	Organismal Systems	Environmental adaptation	04626 Plant-pathogen interaction
Cluster_31798	"K14516,K13433,K13434,K14517"	Organismal Systems	Environmental adaptation	04626 Plant-pathogen interaction
Cluster_3181	"K03021,K13434,K14516,K14517"	Organismal Systems	Environmental adaptation	04626 Plant-pathogen interaction
Cluster_31857	K13412	Organismal Systems	Environmental adaptation	04626 Plant-pathogen interaction
Cluster_3186	"K14510,K13429"	Organismal Systems	Environmental adaptation	04626 Plant-pathogen interaction
Cluster_31871	K09487	Organismal Systems	Environmental adaptation	04626 Plant-pathogen interaction
Cluster_31973	"K04706,K03283,K16225,K08852"	Organismal Systems	Environmental adaptation	04626 Plant-pathogen interaction
Cluster_32060	"K13436,K16224,K13430"	Organismal Systems	Environmental adaptation	04626 Plant-pathogen interaction
Cluster_321	"K01886,K05658,K00654,K01191,K13420,K13428,K12741,K07198,K01456,K04077,K03644,K14539,K12882,K01623,K01188,K04392,K07374,K14760,K12619,K01876,K02350,K00799"	Organismal Systems	Environmental adaptation	04626 Plant-pathogen interaction
Cluster_3212	"K01915,K04079,K01889"	Organismal Systems	Environmental adaptation	04626 Plant-pathogen interaction
Cluster_32176	"K13416,K13415,K13428,K13420"	Organismal Systems	Environmental adaptation	04626 Plant-pathogen interaction
Cluster_3222	"K13430,K13459"	Organismal Systems	Environmental adaptation	04626 Plant-pathogen interaction
Cluster_32269	"K01930,K13457"	Organismal Systems	Environmental adaptation	04626 Plant-pathogen interaction
Cluster_323	"K14760,K07374,K17982,K03283,K01623,K02328,K01876,K03136,K05658,K05356,K05290,K01006,K12882,K00559,K13420"	Organismal Systems	Environmental adaptation	04626 Plant-pathogen interaction
Cluster_32311	K13456	Organismal Systems	Environmental adaptation	04626 Plant-pathogen interaction
Cluster_32338	"K13416,K13459,K13436,K13417,K01183,K00276"	Organismal Systems	Environmental adaptation	04626 Plant-pathogen interaction
Cluster_32429	K13412	Organismal Systems	Environmental adaptation	04626 Plant-pathogen interaction
Cluster_32443	"K13430,K13415"	Organismal Systems	Environmental adaptation	04626 Plant-pathogen interaction
Cluster_3257	"K13457,K01930"	Organismal Systems	Environmental adaptation	04626 Plant-pathogen interaction
Cluster_32652	K13448	Organismal Systems	Environmental adaptation	04626 Plant-pathogen interaction
Cluster_3282	"K13430,K13436"	Organismal Systems	Environmental adaptation	04626 Plant-pathogen interaction
Cluster_3289	"K13415,K13430"	Organismal Systems	Environmental adaptation	04626 Plant-pathogen interaction
Cluster_32992	"K13434,K14516,K14517"	Organismal Systems	Environmental adaptation	04626 Plant-pathogen interaction
Cluster_32999	K02183	Organismal Systems	Environmental adaptation	04626 Plant-pathogen interaction
Cluster_33024	"K13416,K13436,K16224,K13430"	Organismal Systems	Environmental adaptation	04626 Plant-pathogen interaction
Cluster_33053	"K13415,K13428,K13420,K11147"	Organismal Systems	Environmental adaptation	04626 Plant-pathogen interaction
Cluster_33169	K02183	Organismal Systems	Environmental adaptation	04626 Plant-pathogen interaction
Cluster_3320	K09487	Organismal Systems	Environmental adaptation	04626 Plant-pathogen interaction
Cluster_33220	"K04077,K13420,K00430,K12741,K05658,K02350,K13811,K01209,K12619,K12604,K03283,K01623,K13648,K17982"	Organismal Systems	Environmental adaptation	04626 Plant-pathogen interaction
Cluster_33228	K13436	Organismal Systems	Environmental adaptation	04626 Plant-pathogen interaction
Cluster_33272	K18875	Organismal Systems	Environmental adaptation	04626 Plant-pathogen interaction
Cluster_3328	K13429	Organismal Systems	Environmental adaptation	04626 Plant-pathogen interaction
Cluster_33461	K13449	Organismal Systems	Environmental adaptation	04626 Plant-pathogen interaction
Cluster_33556	K13430	Organismal Systems	Environmental adaptation	04626 Plant-pathogen interaction
Cluster_33669	K13457	Organismal Systems	Environmental adaptation	04626 Plant-pathogen interaction
Cluster_337	"K13356,K13457,K10599,K14513,K12153,K12852,K00850,K12819"	Organismal Systems	Environmental adaptation	04626 Plant-pathogen interaction
Cluster_3372	K13458	Organismal Systems	Environmental adaptation	04626 Plant-pathogen interaction
Cluster_33725	"K13412,K14758,K07198"	Organismal Systems	Environmental adaptation	04626 Plant-pathogen interaction
Cluster_3377	"K13457,K13459"	Organismal Systems	Environmental adaptation	04626 Plant-pathogen interaction
Cluster_33820	"K04373,K08269,K13412,K13130"	Organismal Systems	Environmental adaptation	04626 Plant-pathogen interaction
Cluster_33832	"K18835,K13424"	Organismal Systems	Environmental adaptation	04626 Plant-pathogen interaction
Cluster_33866	K13430	Organismal Systems	Environmental adaptation	04626 Plant-pathogen interaction
Cluster_33889	K13412	Organismal Systems	Environmental adaptation	04626 Plant-pathogen interaction
Cluster_33996	"K02984,K13415,K13420"	Organismal Systems	Environmental adaptation	04626 Plant-pathogen interaction
Cluster_3406	"K13457,K01177"	Organismal Systems	Environmental adaptation	04626 Plant-pathogen interaction
Cluster_34069	K13412	Organismal Systems	Environmental adaptation	04626 Plant-pathogen interaction
Cluster_34175	K13448	Organismal Systems	Environmental adaptation	04626 Plant-pathogen interaction
Cluster_34191	K13414	Organismal Systems	Environmental adaptation	04626 Plant-pathogen interaction
Cluster_34198	K13459	Organismal Systems	Environmental adaptation	04626 Plant-pathogen interaction
Cluster_3423	"K08852,K13459,K03283,K16225"	Organismal Systems	Environmental adaptation	04626 Plant-pathogen interaction
Cluster_34268	"K01183,K13430,K13415"	Organismal Systems	Environmental adaptation	04626 Plant-pathogen interaction
Cluster_34272	"K01183,K13420,K13430,K13436,K03283"	Organismal Systems	Environmental adaptation	04626 Plant-pathogen interaction
Cluster_343	K18835	Organismal Systems	Environmental adaptation	04626 Plant-pathogen interaction
Cluster_34319	K13456	Organismal Systems	Environmental adaptation	04626 Plant-pathogen interaction
Cluster_34362	"K13436,K13416,K13415"	Organismal Systems	Environmental adaptation	04626 Plant-pathogen interaction
Cluster_34385	K13448	Organismal Systems	Environmental adaptation	04626 Plant-pathogen interaction
Cluster_34402	K13449	Organismal Systems	Environmental adaptation	04626 Plant-pathogen interaction
Cluster_34497	"K13424,K02888,K18834"	Organismal Systems	Environmental adaptation	04626 Plant-pathogen interaction
Cluster_3452	K13457	Organismal Systems	Environmental adaptation	04626 Plant-pathogen interaction
Cluster_34624	K13457	Organismal Systems	Environmental adaptation	04626 Plant-pathogen interaction
Cluster_34697	K02183	Organismal Systems	Environmental adaptation	04626 Plant-pathogen interaction
Cluster_3479	"K02984,K13415,K13420"	Organismal Systems	Environmental adaptation	04626 Plant-pathogen interaction
Cluster_34791	K13448	Organismal Systems	Environmental adaptation	04626 Plant-pathogen interaction
Cluster_34794	K02183	Organismal Systems	Environmental adaptation	04626 Plant-pathogen interaction
Cluster_34896	K13416	Organismal Systems	Environmental adaptation	04626 Plant-pathogen interaction
Cluster_35004	"K08852,K16226,K13414,K04646,K01115,K03283,K07466,K02183,K05349,K14309"	Organismal Systems	Environmental adaptation	04626 Plant-pathogen interaction
Cluster_3503	"K07198,K01456,K14400,K14416,K01191,K05658,K13436,K02350,K03283,K12619"	Organismal Systems	Environmental adaptation	04626 Plant-pathogen interaction
Cluster_35031	K13456	Organismal Systems	Environmental adaptation	04626 Plant-pathogen interaction
Cluster_35041	K18875	Organismal Systems	Environmental adaptation	04626 Plant-pathogen interaction
Cluster_35054	"K13416,K13459,K13417,K18873,K13430,K01183"	Organismal Systems	Environmental adaptation	04626 Plant-pathogen interaction
Cluster_3515	"K13416,K01183,K13430,K18873"	Organismal Systems	Environmental adaptation	04626 Plant-pathogen interaction
Cluster_35184	K13412	Organismal Systems	Environmental adaptation	04626 Plant-pathogen interaction
Cluster_3519	"K13459,K13415,K13457"	Organismal Systems	Environmental adaptation	04626 Plant-pathogen interaction
Cluster_35243	"K13416,K01183"	Organismal Systems	Environmental adaptation	04626 Plant-pathogen interaction
Cluster_35328	K13430	Organismal Systems	Environmental adaptation	04626 Plant-pathogen interaction
Cluster_35410	K13412	Organismal Systems	Environmental adaptation	04626 Plant-pathogen interaction
Cluster_35490	K16224	Organismal Systems	Environmental adaptation	04626 Plant-pathogen interaction
Cluster_3559	K13430	Organismal Systems	Environmental adaptation	04626 Plant-pathogen interaction
Cluster_35636	K02183	Organismal Systems	Environmental adaptation	04626 Plant-pathogen interaction
Cluster_3569	"K13459,K13460"	Organismal Systems	Environmental adaptation	04626 Plant-pathogen interaction
Cluster_357	"K13420,K13430,K13415,K13416"	Organismal Systems	Environmental adaptation	04626 Plant-pathogen interaction
Cluster_3571	"K13432,K13433,K14516,K14517,K14297"	Organismal Systems	Environmental adaptation	04626 Plant-pathogen interaction
Cluster_3574	"K13416,K13459,K16224,K13417,K13415,K13430"	Organismal Systems	Environmental adaptation	04626 Plant-pathogen interaction
Cluster_35779	"K13459,K13126"	Organismal Systems	Environmental adaptation	04626 Plant-pathogen interaction
Cluster_35806	"K13436,K13430"	Organismal Systems	Environmental adaptation	04626 Plant-pathogen interaction
Cluster_3589	"K13417,K01183,K13430,K13416,K13436"	Organismal Systems	Environmental adaptation	04626 Plant-pathogen interaction
Cluster_36	"K07374,K12619,K02350,K05658,K13420,K00430,K07198,K12741,K14457,K01456,K14539,K01051"	Organismal Systems	Environmental adaptation	04626 Plant-pathogen interaction
Cluster_36035	K02183	Organismal Systems	Environmental adaptation	04626 Plant-pathogen interaction
Cluster_36060	K13416	Organismal Systems	Environmental adaptation	04626 Plant-pathogen interaction
Cluster_36190	K13448	Organismal Systems	Environmental adaptation	04626 Plant-pathogen interaction
Cluster_36259	K13416	Organismal Systems	Environmental adaptation	04626 Plant-pathogen interaction
Cluster_36277	K18875	Organismal Systems	Environmental adaptation	04626 Plant-pathogen interaction
Cluster_36285	K13414	Organismal Systems	Environmental adaptation	04626 Plant-pathogen interaction
Cluster_3629	"K13415,K13430,K13429,K13416,K16224"	Organismal Systems	Environmental adaptation	04626 Plant-pathogen interaction
Cluster_36328	"K13415,K13420,K13428"	Organismal Systems	Environmental adaptation	04626 Plant-pathogen interaction
Cluster_36358	"K09422,K16166,K02259"	Organismal Systems	Environmental adaptation	04626 Plant-pathogen interaction
Cluster_36386	"K13416,K13415,K13420"	Organismal Systems	Environmental adaptation	04626 Plant-pathogen interaction
Cluster_36395	K04079	Organismal Systems	Environmental adaptation	04626 Plant-pathogen interaction
Cluster_3643	"K13457,K08503"	Organismal Systems	Environmental adaptation	04626 Plant-pathogen interaction
Cluster_36452	K13412	Organismal Systems	Environmental adaptation	04626 Plant-pathogen interaction
Cluster_36483	"K13415,K13420,K02146"	Organismal Systems	Environmental adaptation	04626 Plant-pathogen interaction
Cluster_36529	K13412	Organismal Systems	Environmental adaptation	04626 Plant-pathogen interaction
Cluster_36582	K13412	Organismal Systems	Environmental adaptation	04626 Plant-pathogen interaction
Cluster_3662	K05391	Organismal Systems	Environmental adaptation	04626 Plant-pathogen interaction
Cluster_36688	"K07198,K04688,K03097,K14758,K13412"	Organismal Systems	Environmental adaptation	04626 Plant-pathogen interaction
Cluster_36702	"K03021,K13433,K13432,K13434,K14516,K14517"	Organismal Systems	Environmental adaptation	04626 Plant-pathogen interaction
Cluster_36803	"K08852,K16911,K16225,K03283,K13414,K01115,K02183,K07466,K14309,K05349"	Organismal Systems	Environmental adaptation	04626 Plant-pathogen interaction
Cluster_36815	K13449	Organismal Systems	Environmental adaptation	04626 Plant-pathogen interaction
Cluster_36890	"K13430,K13436"	Organismal Systems	Environmental adaptation	04626 Plant-pathogen interaction
Cluster_369	"K13459,K01648,K13460"	Organismal Systems	Environmental adaptation	04626 Plant-pathogen interaction
Cluster_36975	K13448	Organismal Systems	Environmental adaptation	04626 Plant-pathogen interaction
Cluster_3700	K13457	Organismal Systems	Environmental adaptation	04626 Plant-pathogen interaction
Cluster_37141	"K13425,K13426"	Organismal Systems	Environmental adaptation	04626 Plant-pathogen interaction
Cluster_37157	"K00276,K13430,K13416,K13436"	Organismal Systems	Environmental adaptation	04626 Plant-pathogen interaction
Cluster_3718	K13458	Organismal Systems	Environmental adaptation	04626 Plant-pathogen interaction
Cluster_37265	"K13457,K07466,K02183,K05349,K14309,K16226,K08852,K16911,K13414,K01115,K04646,K03283"	Organismal Systems	Environmental adaptation	04626 Plant-pathogen interaction
Cluster_37330	"K13416,K13436,K13429,K13415,K13430"	Organismal Systems	Environmental adaptation	04626 Plant-pathogen interaction
Cluster_37334	"K01183,K13430"	Organismal Systems	Environmental adaptation	04626 Plant-pathogen interaction
Cluster_37417	K13416	Organismal Systems	Environmental adaptation	04626 Plant-pathogen interaction
Cluster_37553	"K13424,K13423,K18834,K18835"	Organismal Systems	Environmental adaptation	04626 Plant-pathogen interaction
Cluster_37556	"K18834,K13425,K16225"	Organismal Systems	Environmental adaptation	04626 Plant-pathogen interaction
Cluster_3758	"K05349,K14309,K07466,K02183,K01115,K04646,K03283,K16225,K16226,K08852,K16911"	Organismal Systems	Environmental adaptation	04626 Plant-pathogen interaction
Cluster_37587	"K16911,K08852,K16226,K03283,K16225,K14309"	Organismal Systems	Environmental adaptation	04626 Plant-pathogen interaction
Cluster_37629	K13412	Organismal Systems	Environmental adaptation	04626 Plant-pathogen interaction
Cluster_3769	"K13416,K13417,K01176"	Organismal Systems	Environmental adaptation	04626 Plant-pathogen interaction
Cluster_37691	"K09422,K16166,K02259"	Organismal Systems	Environmental adaptation	04626 Plant-pathogen interaction
Cluster_3770	"K13430,K13429,K01183,K13416,K16224,K13436,K13459"	Organismal Systems	Environmental adaptation	04626 Plant-pathogen interaction
Cluster_3771	"K06276,K07198,K13414,K13413,K08269,K13412"	Organismal Systems	Environmental adaptation	04626 Plant-pathogen interaction
Cluster_37948	K13412	Organismal Systems	Environmental adaptation	04626 Plant-pathogen interaction
Cluster_3799	"K13413,K04368,K13414,K07198"	Organismal Systems	Environmental adaptation	04626 Plant-pathogen interaction
Cluster_38044	K13412	Organismal Systems	Environmental adaptation	04626 Plant-pathogen interaction
Cluster_38051	"K08852,K16226,K01115,K04646,K13414,K03283,K07466,K02183,K05349,K14309"	Organismal Systems	Environmental adaptation	04626 Plant-pathogen interaction
Cluster_3807	"K01183,K13430,K13415,K01176,K13417,K13416"	Organismal Systems	Environmental adaptation	04626 Plant-pathogen interaction
Cluster_38167	K02183	Organismal Systems	Environmental adaptation	04626 Plant-pathogen interaction
Cluster_3819	"K13430,K01183"	Organismal Systems	Environmental adaptation	04626 Plant-pathogen interaction
Cluster_38198	"K03283,K04646,K01115,K13414,K08852,K16226,K14309,K02183,K07466"	Organismal Systems	Environmental adaptation	04626 Plant-pathogen interaction
Cluster_3820	"K13420,K13428"	Organismal Systems	Environmental adaptation	04626 Plant-pathogen interaction
Cluster_38208	K13429	Organismal Systems	Environmental adaptation	04626 Plant-pathogen interaction
Cluster_38234	"K14517,K03021,K13432,K13434,K14516"	Organismal Systems	Environmental adaptation	04626 Plant-pathogen interaction
Cluster_3825	K13414	Organismal Systems	Environmental adaptation	04626 Plant-pathogen interaction
Cluster_38321	K13412	Organismal Systems	Environmental adaptation	04626 Plant-pathogen interaction
Cluster_3838	"K13430,K13429,K13459,K13436"	Organismal Systems	Environmental adaptation	04626 Plant-pathogen interaction
Cluster_38493	"K04706,K16225,K03283,K08852,K16226,K16911,K13459"	Organismal Systems	Environmental adaptation	04626 Plant-pathogen interaction
Cluster_3860	"K13415,K13416"	Organismal Systems	Environmental adaptation	04626 Plant-pathogen interaction
Cluster_38677	"K13430,K13416,K16224,K13436"	Organismal Systems	Environmental adaptation	04626 Plant-pathogen interaction
Cluster_3868	K13412	Organismal Systems	Environmental adaptation	04626 Plant-pathogen interaction
Cluster_38690	"K16224,K18873,K13430"	Organismal Systems	Environmental adaptation	04626 Plant-pathogen interaction
Cluster_3874	"K13420,K13428"	Organismal Systems	Environmental adaptation	04626 Plant-pathogen interaction
Cluster_38756	"K09422,K02259,K16166"	Organismal Systems	Environmental adaptation	04626 Plant-pathogen interaction
Cluster_38834	K13425	Organismal Systems	Environmental adaptation	04626 Plant-pathogen interaction
Cluster_38898	K02183	Organismal Systems	Environmental adaptation	04626 Plant-pathogen interaction
Cluster_3896	"K13416,K13436,K16224,K13417,K01183,K13429,K13430,K13415"	Organismal Systems	Environmental adaptation	04626 Plant-pathogen interaction
Cluster_3904	"K12897,K13412,K12489,K02183"	Organismal Systems	Environmental adaptation	04626 Plant-pathogen interaction
Cluster_391	"K05756,K00566,K01738,K12819,K13457,K13356,K10599,K05666,K16196,K05605,K01191,K15086"	Organismal Systems	Environmental adaptation	04626 Plant-pathogen interaction
Cluster_3915	"K13430,K13436"	Organismal Systems	Environmental adaptation	04626 Plant-pathogen interaction
Cluster_39300	"K13417,K13416"	Organismal Systems	Environmental adaptation	04626 Plant-pathogen interaction
Cluster_3932	"K13430,K13436"	Organismal Systems	Environmental adaptation	04626 Plant-pathogen interaction
Cluster_3949	"K13416,K13420,K13430,K13415"	Organismal Systems	Environmental adaptation	04626 Plant-pathogen interaction
Cluster_395	"K12819,K12153,K01191,K18819,K10599,K13457,K13356,K05666"	Organismal Systems	Environmental adaptation	04626 Plant-pathogen interaction
Cluster_39504	K14512	Organismal Systems	Environmental adaptation	04626 Plant-pathogen interaction
Cluster_39594	K13458	Organismal Systems	Environmental adaptation	04626 Plant-pathogen interaction
Cluster_39617	K02183	Organismal Systems	Environmental adaptation	04626 Plant-pathogen interaction
Cluster_39625	"K01183,K13430,K13436"	Organismal Systems	Environmental adaptation	04626 Plant-pathogen interaction
Cluster_39676	"K13416,K13415"	Organismal Systems	Environmental adaptation	04626 Plant-pathogen interaction
Cluster_3968	K05391	Organismal Systems	Environmental adaptation	04626 Plant-pathogen interaction
Cluster_39782	"K13424,K18834,K16225,K13425,K18835"	Organismal Systems	Environmental adaptation	04626 Plant-pathogen interaction
Cluster_39987	K02183	Organismal Systems	Environmental adaptation	04626 Plant-pathogen interaction
Cluster_40006	K16226	Organismal Systems	Environmental adaptation	04626 Plant-pathogen interaction
Cluster_40036	"K13430,K01183,K13436,K13416"	Organismal Systems	Environmental adaptation	04626 Plant-pathogen interaction
Cluster_40062	"K13417,K13416"	Organismal Systems	Environmental adaptation	04626 Plant-pathogen interaction
Cluster_40135	"K16166,K02259,K09422"	Organismal Systems	Environmental adaptation	04626 Plant-pathogen interaction
Cluster_40147	K02183	Organismal Systems	Environmental adaptation	04626 Plant-pathogen interaction
Cluster_4015	"K01183,K13430,K18873"	Organismal Systems	Environmental adaptation	04626 Plant-pathogen interaction
Cluster_40266	"K13417,K01176,K13430,K01183,K13428,K13420,K13416,K13459"	Organismal Systems	Environmental adaptation	04626 Plant-pathogen interaction
Cluster_40363	"K13457,K16226,K13412,K13459"	Organismal Systems	Environmental adaptation	04626 Plant-pathogen interaction
Cluster_4040	"K13430,K13459"	Organismal Systems	Environmental adaptation	04626 Plant-pathogen interaction
Cluster_4042	"K08852,K16226,K13414,K01115,K03283,K16225,K07466,K02183,K05349,K14309"	Organismal Systems	Environmental adaptation	04626 Plant-pathogen interaction
Cluster_40576	"K18873,K01183,K13430"	Organismal Systems	Environmental adaptation	04626 Plant-pathogen interaction
Cluster_4064	K13447	Organismal Systems	Environmental adaptation	04626 Plant-pathogen interaction
Cluster_40688	K13436	Organismal Systems	Environmental adaptation	04626 Plant-pathogen interaction
Cluster_40770	"K05391,K13414"	Organismal Systems	Environmental adaptation	04626 Plant-pathogen interaction
Cluster_40803	"K13429,K13415,K13420"	Organismal Systems	Environmental adaptation	04626 Plant-pathogen interaction
Cluster_40808	K02183	Organismal Systems	Environmental adaptation	04626 Plant-pathogen interaction
Cluster_4081	"K13414,K14510"	Organismal Systems	Environmental adaptation	04626 Plant-pathogen interaction
Cluster_40852	K13434	Organismal Systems	Environmental adaptation	04626 Plant-pathogen interaction
Cluster_40953	"K13459,K16226,K13412,K13457"	Organismal Systems	Environmental adaptation	04626 Plant-pathogen interaction
Cluster_41	"K15086,K01191,K05605,K16196,K05666,K10599,K13457,K13356,K12819,K01738,K14513,K00566,K12153,K05756"	Organismal Systems	Environmental adaptation	04626 Plant-pathogen interaction
Cluster_41056	"K13415,K13420,K13416"	Organismal Systems	Environmental adaptation	04626 Plant-pathogen interaction
Cluster_4109	"K13416,K13436,K16224,K13417,K13429,K13430,K13415"	Organismal Systems	Environmental adaptation	04626 Plant-pathogen interaction
Cluster_41105	"K05349,K01183,K13430,K13429"	Organismal Systems	Environmental adaptation	04626 Plant-pathogen interaction
Cluster_41196	"K02259,K16166,K09422,K12598"	Organismal Systems	Environmental adaptation	04626 Plant-pathogen interaction
Cluster_4122	K13430	Organismal Systems	Environmental adaptation	04626 Plant-pathogen interaction
Cluster_41228	K04079	Organismal Systems	Environmental adaptation	04626 Plant-pathogen interaction
Cluster_41259	"K13416,K13429,K01176"	Organismal Systems	Environmental adaptation	04626 Plant-pathogen interaction
Cluster_41272	"K13420,K13415,K13430,K13459,K13436"	Organismal Systems	Environmental adaptation	04626 Plant-pathogen interaction
Cluster_41366	"K04706,K08852,K16226,K16225,K03283"	Organismal Systems	Environmental adaptation	04626 Plant-pathogen interaction
Cluster_41520	K13412	Organismal Systems	Environmental adaptation	04626 Plant-pathogen interaction
Cluster_41522	"K13416,K13459,K13430,K01183"	Organismal Systems	Environmental adaptation	04626 Plant-pathogen interaction
Cluster_41562	"K18873,K13430"	Organismal Systems	Environmental adaptation	04626 Plant-pathogen interaction
Cluster_41598	K13449	Organismal Systems	Environmental adaptation	04626 Plant-pathogen interaction
Cluster_41646	"K02183,K13448"	Organismal Systems	Environmental adaptation	04626 Plant-pathogen interaction
Cluster_4171	"K13428,K13420,K13466"	Organismal Systems	Environmental adaptation	04626 Plant-pathogen interaction
Cluster_4191	"K05349,K14309,K07466,K02183,K13414,K01115,K03283,K08852,K16226"	Organismal Systems	Environmental adaptation	04626 Plant-pathogen interaction
Cluster_4197	"K13420,K13428"	Organismal Systems	Environmental adaptation	04626 Plant-pathogen interaction
Cluster_4205	K18875	Organismal Systems	Environmental adaptation	04626 Plant-pathogen interaction
Cluster_42103	K04079	Organismal Systems	Environmental adaptation	04626 Plant-pathogen interaction
Cluster_4212	K13414	Organismal Systems	Environmental adaptation	04626 Plant-pathogen interaction
Cluster_42155	"K08852,K16226,K03283,K13414,K04646,K01115,K02183,K07466,K14309"	Organismal Systems	Environmental adaptation	04626 Plant-pathogen interaction
Cluster_42193	"K13424,K18835"	Organismal Systems	Environmental adaptation	04626 Plant-pathogen interaction
Cluster_4221	"K13416,K13436,K18873,K13430,K13429,K01183,K13420"	Organismal Systems	Environmental adaptation	04626 Plant-pathogen interaction
Cluster_42338	K13448	Organismal Systems	Environmental adaptation	04626 Plant-pathogen interaction
Cluster_42432	"K14516,K13433,K13432,K13434,K14517"	Organismal Systems	Environmental adaptation	04626 Plant-pathogen interaction
Cluster_42564	"K02183,K12893"	Organismal Systems	Environmental adaptation	04626 Plant-pathogen interaction
Cluster_42580	K12795	Organismal Systems	Environmental adaptation	04626 Plant-pathogen interaction
Cluster_42641	"K12833,K13412"	Organismal Systems	Environmental adaptation	04626 Plant-pathogen interaction
Cluster_4277	"K16224,K13416,K13430,K13415,K01183,K13417"	Organismal Systems	Environmental adaptation	04626 Plant-pathogen interaction
Cluster_428	"K02183,K07466,K14309,K05349,K08852,K16226,K16911,K03283,K16225,K01115,K13414"	Organismal Systems	Environmental adaptation	04626 Plant-pathogen interaction
Cluster_4280	"K01176,K13416"	Organismal Systems	Environmental adaptation	04626 Plant-pathogen interaction
Cluster_4282	"K13424,K18835"	Organismal Systems	Environmental adaptation	04626 Plant-pathogen interaction
Cluster_429	"K00559,K01456,K12882,K14539,K04077,K13428,K13420,K07198,K12741,K05658,K14416,K03136,K01006,K14400,K02350,K01876,K01209,K12619,K03283,K01623,K07374,K04392,K17982"	Organismal Systems	Environmental adaptation	04626 Plant-pathogen interaction
Cluster_4294	"K13416,K01176,K13417"	Organismal Systems	Environmental adaptation	04626 Plant-pathogen interaction
Cluster_43057	"K12893,K02183"	Organismal Systems	Environmental adaptation	04626 Plant-pathogen interaction
Cluster_43069	K13430	Organismal Systems	Environmental adaptation	04626 Plant-pathogen interaction
Cluster_43141	K13412	Organismal Systems	Environmental adaptation	04626 Plant-pathogen interaction
Cluster_43205	"K09422,K02259,K16166"	Organismal Systems	Environmental adaptation	04626 Plant-pathogen interaction
Cluster_43264	K13412	Organismal Systems	Environmental adaptation	04626 Plant-pathogen interaction
Cluster_4335	"K00162,K13126,K13459"	Organismal Systems	Environmental adaptation	04626 Plant-pathogen interaction
Cluster_4348	"K18873,K13430,K13436"	Organismal Systems	Environmental adaptation	04626 Plant-pathogen interaction
Cluster_43522	"K14517,K14516,K13433,K13432"	Organismal Systems	Environmental adaptation	04626 Plant-pathogen interaction
Cluster_4368	K13412	Organismal Systems	Environmental adaptation	04626 Plant-pathogen interaction
Cluster_43694	K13416	Organismal Systems	Environmental adaptation	04626 Plant-pathogen interaction
Cluster_43717	K18875	Organismal Systems	Environmental adaptation	04626 Plant-pathogen interaction
Cluster_4377	"K01176,K13417,K01183,K13430,K13416"	Organismal Systems	Environmental adaptation	04626 Plant-pathogen interaction
Cluster_43808	"K13415,K13429,K13416,K13436"	Organismal Systems	Environmental adaptation	04626 Plant-pathogen interaction
Cluster_4384	"K13416,K13415,K13420"	Organismal Systems	Environmental adaptation	04626 Plant-pathogen interaction
Cluster_4387	K13447	Organismal Systems	Environmental adaptation	04626 Plant-pathogen interaction
Cluster_43889	"K13415,K13420,K13428,K14301,K02146"	Organismal Systems	Environmental adaptation	04626 Plant-pathogen interaction
Cluster_43926	"K03021,K13432,K13434,K14516,K14517"	Organismal Systems	Environmental adaptation	04626 Plant-pathogen interaction
Cluster_43929	"K08852,K03283,K16225"	Organismal Systems	Environmental adaptation	04626 Plant-pathogen interaction
Cluster_4394	"K01183,K13417,K05349,K13459,K13416"	Organismal Systems	Environmental adaptation	04626 Plant-pathogen interaction
Cluster_44100	"K16224,K13436,K13416,K13430"	Organismal Systems	Environmental adaptation	04626 Plant-pathogen interaction
Cluster_44107	"K16225,K03283,K16911,K08852,K16226,K14309"	Organismal Systems	Environmental adaptation	04626 Plant-pathogen interaction
Cluster_4416	K13457	Organismal Systems	Environmental adaptation	04626 Plant-pathogen interaction
Cluster_44203	K13448	Organismal Systems	Environmental adaptation	04626 Plant-pathogen interaction
Cluster_4427	"K13430,K13459"	Organismal Systems	Environmental adaptation	04626 Plant-pathogen interaction
Cluster_4448	"K04371,K14512"	Organismal Systems	Environmental adaptation	04626 Plant-pathogen interaction
Cluster_44541	K02183	Organismal Systems	Environmental adaptation	04626 Plant-pathogen interaction
Cluster_44592	K13448	Organismal Systems	Environmental adaptation	04626 Plant-pathogen interaction
Cluster_4461	"K13424,K10802,K13425,K16225"	Organismal Systems	Environmental adaptation	04626 Plant-pathogen interaction
Cluster_44642	K02183	Organismal Systems	Environmental adaptation	04626 Plant-pathogen interaction
Cluster_44881	"K18834,K18835,K13424"	Organismal Systems	Environmental adaptation	04626 Plant-pathogen interaction
Cluster_44951	"K18835,K13424"	Organismal Systems	Environmental adaptation	04626 Plant-pathogen interaction
Cluster_44962	"K18834,K13426,K13425,K13424"	Organismal Systems	Environmental adaptation	04626 Plant-pathogen interaction
Cluster_44966	K13436	Organismal Systems	Environmental adaptation	04626 Plant-pathogen interaction
Cluster_4508	"K13459,K13436,K18873,K01183,K13415,K13430,K13429"	Organismal Systems	Environmental adaptation	04626 Plant-pathogen interaction
Cluster_45305	K13416	Organismal Systems	Environmental adaptation	04626 Plant-pathogen interaction
Cluster_45371	"K13457,K01930"	Organismal Systems	Environmental adaptation	04626 Plant-pathogen interaction
Cluster_4546	K05391	Organismal Systems	Environmental adaptation	04626 Plant-pathogen interaction
Cluster_45500	K13412	Organismal Systems	Environmental adaptation	04626 Plant-pathogen interaction
Cluster_45504	K13434	Organismal Systems	Environmental adaptation	04626 Plant-pathogen interaction
Cluster_45556	"K14516,K13434,K03021,K13432,K14517"	Organismal Systems	Environmental adaptation	04626 Plant-pathogen interaction
Cluster_4562	K13436	Organismal Systems	Environmental adaptation	04626 Plant-pathogen interaction
Cluster_4567	"K01689,K03021,K13434,K14516"	Organismal Systems	Environmental adaptation	04626 Plant-pathogen interaction
Cluster_45697	K13412	Organismal Systems	Environmental adaptation	04626 Plant-pathogen interaction
Cluster_4572	K13412	Organismal Systems	Environmental adaptation	04626 Plant-pathogen interaction
Cluster_4578	"K16224,K13430,K18873"	Organismal Systems	Environmental adaptation	04626 Plant-pathogen interaction
Cluster_4586	"K13415,K13420,K13428"	Organismal Systems	Environmental adaptation	04626 Plant-pathogen interaction
Cluster_45914	"K13416,K16224,K13436,K13430"	Organismal Systems	Environmental adaptation	04626 Plant-pathogen interaction
Cluster_4605	"K18873,K01183,K13430"	Organismal Systems	Environmental adaptation	04626 Plant-pathogen interaction
Cluster_46084	K13412	Organismal Systems	Environmental adaptation	04626 Plant-pathogen interaction
Cluster_46151	"K13420,K13415,K13416"	Organismal Systems	Environmental adaptation	04626 Plant-pathogen interaction
Cluster_46191	"K13415,K02146,K13420,K13416"	Organismal Systems	Environmental adaptation	04626 Plant-pathogen interaction
Cluster_4638	"K18873,K01183,K13430"	Organismal Systems	Environmental adaptation	04626 Plant-pathogen interaction
Cluster_46399	"K01188,K13416,K13415,K13420"	Organismal Systems	Environmental adaptation	04626 Plant-pathogen interaction
Cluster_46407	K13412	Organismal Systems	Environmental adaptation	04626 Plant-pathogen interaction
Cluster_4642	"K01183,K13420,K13430,K13415,K13416,K16224"	Organismal Systems	Environmental adaptation	04626 Plant-pathogen interaction
Cluster_46420	"K13420,K14510"	Organismal Systems	Environmental adaptation	04626 Plant-pathogen interaction
Cluster_4648	"K13459,K16224,K13436,K14317,K13420,K13430"	Organismal Systems	Environmental adaptation	04626 Plant-pathogen interaction
Cluster_465	"K05391,K12489,K12616,K14497,K03243,K16196,K08081,K04079,K00815,K08503,K00889,K07466,K17982,K01915"	Organismal Systems	Environmental adaptation	04626 Plant-pathogen interaction
Cluster_46553	K13416	Organismal Systems	Environmental adaptation	04626 Plant-pathogen interaction
Cluster_46602	K12795	Organismal Systems	Environmental adaptation	04626 Plant-pathogen interaction
Cluster_46612	K13430	Organismal Systems	Environmental adaptation	04626 Plant-pathogen interaction
Cluster_4662	"K13416,K13430,K13417"	Organismal Systems	Environmental adaptation	04626 Plant-pathogen interaction
Cluster_4669	"K01183,K13430,K13429"	Organismal Systems	Environmental adaptation	04626 Plant-pathogen interaction
Cluster_46919	K13414	Organismal Systems	Environmental adaptation	04626 Plant-pathogen interaction
Cluster_4698	K05391	Organismal Systems	Environmental adaptation	04626 Plant-pathogen interaction
Cluster_47069	"K13424,K18835,K18834"	Organismal Systems	Environmental adaptation	04626 Plant-pathogen interaction
Cluster_4712	"K13416,K01176"	Organismal Systems	Environmental adaptation	04626 Plant-pathogen interaction
Cluster_4722	"K13417,K13415,K13416"	Organismal Systems	Environmental adaptation	04626 Plant-pathogen interaction
Cluster_4734	K13457	Organismal Systems	Environmental adaptation	04626 Plant-pathogen interaction
Cluster_47433	"K18835,K13424"	Organismal Systems	Environmental adaptation	04626 Plant-pathogen interaction
Cluster_47613	K13412	Organismal Systems	Environmental adaptation	04626 Plant-pathogen interaction
Cluster_4766	K13456	Organismal Systems	Environmental adaptation	04626 Plant-pathogen interaction
Cluster_47686	"K01183,K13430,K13415"	Organismal Systems	Environmental adaptation	04626 Plant-pathogen interaction
Cluster_4771	K13429	Organismal Systems	Environmental adaptation	04626 Plant-pathogen interaction
Cluster_4773	"K01183,K13430"	Organismal Systems	Environmental adaptation	04626 Plant-pathogen interaction
Cluster_47744	"K13459,K13460"	Organismal Systems	Environmental adaptation	04626 Plant-pathogen interaction
Cluster_4792	"K13460,K13459"	Organismal Systems	Environmental adaptation	04626 Plant-pathogen interaction
Cluster_4798	"K13416,K13417,K13415"	Organismal Systems	Environmental adaptation	04626 Plant-pathogen interaction
Cluster_48014	K13412	Organismal Systems	Environmental adaptation	04626 Plant-pathogen interaction
Cluster_4805	K13430	Organismal Systems	Environmental adaptation	04626 Plant-pathogen interaction
Cluster_4806	"K02183,K05349,K14309,K16911,K16226,K08852,K13414,K04646,K01115,K03283"	Organismal Systems	Environmental adaptation	04626 Plant-pathogen interaction
Cluster_48078	"K03021,K13434,K14516,K01689"	Organismal Systems	Environmental adaptation	04626 Plant-pathogen interaction
Cluster_4819	"K13416,K13417,K01176"	Organismal Systems	Environmental adaptation	04626 Plant-pathogen interaction
Cluster_48222	"K13425,K18834"	Organismal Systems	Environmental adaptation	04626 Plant-pathogen interaction
Cluster_48232	K04079	Organismal Systems	Environmental adaptation	04626 Plant-pathogen interaction
Cluster_48286	"K14517,K14516,K13434,K13433,K03021,K13432"	Organismal Systems	Environmental adaptation	04626 Plant-pathogen interaction
Cluster_4835	"K01176,K13416"	Organismal Systems	Environmental adaptation	04626 Plant-pathogen interaction
Cluster_4844	"K16224,K13416,K13415,K13420"	Organismal Systems	Environmental adaptation	04626 Plant-pathogen interaction
Cluster_4845	K13412	Organismal Systems	Environmental adaptation	04626 Plant-pathogen interaction
Cluster_485	K13420	Organismal Systems	Environmental adaptation	04626 Plant-pathogen interaction
Cluster_48521	K13420	Organismal Systems	Environmental adaptation	04626 Plant-pathogen interaction
Cluster_4884	"K13412,K14758"	Organismal Systems	Environmental adaptation	04626 Plant-pathogen interaction
Cluster_48902	K13412	Organismal Systems	Environmental adaptation	04626 Plant-pathogen interaction
Cluster_48933	K18834	Organismal Systems	Environmental adaptation	04626 Plant-pathogen interaction
Cluster_49028	K16226	Organismal Systems	Environmental adaptation	04626 Plant-pathogen interaction
Cluster_49045	"K08852,K16226,K04646,K01115,K13414,K03283,K07466,K02183,K05349,K14309"	Organismal Systems	Environmental adaptation	04626 Plant-pathogen interaction
Cluster_49123	K13430	Organismal Systems	Environmental adaptation	04626 Plant-pathogen interaction
Cluster_4923	K13416	Organismal Systems	Environmental adaptation	04626 Plant-pathogen interaction
Cluster_49266	"K13430,K16224"	Organismal Systems	Environmental adaptation	04626 Plant-pathogen interaction
Cluster_49598	"K18873,K13430"	Organismal Systems	Environmental adaptation	04626 Plant-pathogen interaction
Cluster_4961	"K13430,K01183,K13417,K13416"	Organismal Systems	Environmental adaptation	04626 Plant-pathogen interaction
Cluster_49677	K05391	Organismal Systems	Environmental adaptation	04626 Plant-pathogen interaction
Cluster_4968	K13412	Organismal Systems	Environmental adaptation	04626 Plant-pathogen interaction
Cluster_49694	K13448	Organismal Systems	Environmental adaptation	04626 Plant-pathogen interaction
Cluster_4970	"K13415,K13420,K13428"	Organismal Systems	Environmental adaptation	04626 Plant-pathogen interaction
Cluster_4972	"K13417,K01183,K13416,K13459"	Organismal Systems	Environmental adaptation	04626 Plant-pathogen interaction
Cluster_49796	"K13415,K02146,K13428,K13420"	Organismal Systems	Environmental adaptation	04626 Plant-pathogen interaction
Cluster_49829	K13416	Organismal Systems	Environmental adaptation	04626 Plant-pathogen interaction
Cluster_49846	K13424	Organismal Systems	Environmental adaptation	04626 Plant-pathogen interaction
Cluster_49905	K13412	Organismal Systems	Environmental adaptation	04626 Plant-pathogen interaction
Cluster_5003	"K07466,K02183,K05349,K14309,K08852,K16226,K13414,K01115,K03283"	Organismal Systems	Environmental adaptation	04626 Plant-pathogen interaction
Cluster_50061	"K14517,K14516,K13433,K13432,K13434"	Organismal Systems	Environmental adaptation	04626 Plant-pathogen interaction
Cluster_50077	"K01183,K13430,K18873,K13436"	Organismal Systems	Environmental adaptation	04626 Plant-pathogen interaction
Cluster_50153	"K13428,K13420"	Organismal Systems	Environmental adaptation	04626 Plant-pathogen interaction
Cluster_5020	"K13412,K05658"	Organismal Systems	Environmental adaptation	04626 Plant-pathogen interaction
Cluster_5021	"K08852,K16911,K13459,K16225"	Organismal Systems	Environmental adaptation	04626 Plant-pathogen interaction
Cluster_5030	"K03283,K01115,K04646,K13414,K16226,K08852,K14309,K05349,K02183,K07466"	Organismal Systems	Environmental adaptation	04626 Plant-pathogen interaction
Cluster_5040	"K13430,K13415,K13436,K16224,K13459"	Organismal Systems	Environmental adaptation	04626 Plant-pathogen interaction
Cluster_50460	"K09422,K16166"	Organismal Systems	Environmental adaptation	04626 Plant-pathogen interaction
Cluster_5051	"K13426,K13425,K16225,K10802"	Organismal Systems	Environmental adaptation	04626 Plant-pathogen interaction
Cluster_50553	K13412	Organismal Systems	Environmental adaptation	04626 Plant-pathogen interaction
Cluster_50566	"K13416,K16224,K13436,K13430"	Organismal Systems	Environmental adaptation	04626 Plant-pathogen interaction
Cluster_5072	K13414	Organismal Systems	Environmental adaptation	04626 Plant-pathogen interaction
Cluster_50743	"K01373,K01365"	Organismal Systems	Environmental adaptation	04626 Plant-pathogen interaction
Cluster_5075	"K13425,K16225,K18834,K13424"	Organismal Systems	Environmental adaptation	04626 Plant-pathogen interaction
Cluster_50833	K12795	Organismal Systems	Environmental adaptation	04626 Plant-pathogen interaction
Cluster_5094	"K14517,K03021,K13433,K13432,K13434,K14516"	Organismal Systems	Environmental adaptation	04626 Plant-pathogen interaction
Cluster_50970	"K14517,K13434,K03021,K13432,K14516"	Organismal Systems	Environmental adaptation	04626 Plant-pathogen interaction
Cluster_5130	K13430	Organismal Systems	Environmental adaptation	04626 Plant-pathogen interaction
Cluster_5139	"K13436,K13459,K13415,K12489"	Organismal Systems	Environmental adaptation	04626 Plant-pathogen interaction
Cluster_51497	"K13430,K01183"	Organismal Systems	Environmental adaptation	04626 Plant-pathogen interaction
Cluster_51504	"K13416,K13415,K13420"	Organismal Systems	Environmental adaptation	04626 Plant-pathogen interaction
Cluster_51658	"K13429,K13415,K13416"	Organismal Systems	Environmental adaptation	04626 Plant-pathogen interaction
Cluster_51683	"K14758,K13412"	Organismal Systems	Environmental adaptation	04626 Plant-pathogen interaction
Cluster_51707	K04079	Organismal Systems	Environmental adaptation	04626 Plant-pathogen interaction
Cluster_51713	"K03283,K13416,K13417,K01183"	Organismal Systems	Environmental adaptation	04626 Plant-pathogen interaction
Cluster_51746	K02183	Organismal Systems	Environmental adaptation	04626 Plant-pathogen interaction
Cluster_5179	"K07198,K13414,K04368"	Organismal Systems	Environmental adaptation	04626 Plant-pathogen interaction
Cluster_51833	K13412	Organismal Systems	Environmental adaptation	04626 Plant-pathogen interaction
Cluster_51888	"K13432,K03021,K13434,K14517,K01689"	Organismal Systems	Environmental adaptation	04626 Plant-pathogen interaction
Cluster_52037	"K13424,K13423,K18834,K18835"	Organismal Systems	Environmental adaptation	04626 Plant-pathogen interaction
Cluster_5207	"K01183,K13430,K18873"	Organismal Systems	Environmental adaptation	04626 Plant-pathogen interaction
Cluster_52173	K13457	Organismal Systems	Environmental adaptation	04626 Plant-pathogen interaction
Cluster_5225	"K01176,K13417,K13416"	Organismal Systems	Environmental adaptation	04626 Plant-pathogen interaction
Cluster_52303	K13412	Organismal Systems	Environmental adaptation	04626 Plant-pathogen interaction
Cluster_52328	K13416	Organismal Systems	Environmental adaptation	04626 Plant-pathogen interaction
Cluster_5241	"K13429,K13430,K13417,K13436,K16224,K13416"	Organismal Systems	Environmental adaptation	04626 Plant-pathogen interaction
Cluster_5244	"K13417,K13416"	Organismal Systems	Environmental adaptation	04626 Plant-pathogen interaction
Cluster_5276	"K13430,K13429"	Organismal Systems	Environmental adaptation	04626 Plant-pathogen interaction
Cluster_5280	K13448	Organismal Systems	Environmental adaptation	04626 Plant-pathogen interaction
Cluster_5284	"K13430,K01183,K13416"	Organismal Systems	Environmental adaptation	04626 Plant-pathogen interaction
Cluster_52840	K04079	Organismal Systems	Environmental adaptation	04626 Plant-pathogen interaction
Cluster_5297	K13412	Organismal Systems	Environmental adaptation	04626 Plant-pathogen interaction
Cluster_530	"K02350,K04564,K12619,K07374,K17982,K03283,K01623,K14489,K14539,K04077,K12882,K00559,K01456,K12741,K07198,K13420,K13428,K03136,K01191,K05658,K00654,K02993,K05290,K01006"	Organismal Systems	Environmental adaptation	04626 Plant-pathogen interaction
Cluster_5304	K13412	Organismal Systems	Environmental adaptation	04626 Plant-pathogen interaction
Cluster_53119	K13456	Organismal Systems	Environmental adaptation	04626 Plant-pathogen interaction
Cluster_5317	K18875	Organismal Systems	Environmental adaptation	04626 Plant-pathogen interaction
Cluster_5339	"K13416,K13415,K13417"	Organismal Systems	Environmental adaptation	04626 Plant-pathogen interaction
Cluster_5342	"K14510,K13414"	Organismal Systems	Environmental adaptation	04626 Plant-pathogen interaction
Cluster_53422	K13424	Organismal Systems	Environmental adaptation	04626 Plant-pathogen interaction
Cluster_5343	"K13416,K13417"	Organismal Systems	Environmental adaptation	04626 Plant-pathogen interaction
Cluster_5354	"K13429,K13414,K14510,K08269"	Organismal Systems	Environmental adaptation	04626 Plant-pathogen interaction
Cluster_5363	"K13416,K01183,K13430"	Organismal Systems	Environmental adaptation	04626 Plant-pathogen interaction
Cluster_5364	K13427	Organismal Systems	Environmental adaptation	04626 Plant-pathogen interaction
Cluster_53757	"K13413,K04368"	Organismal Systems	Environmental adaptation	04626 Plant-pathogen interaction
Cluster_538	"K13459,K13460"	Organismal Systems	Environmental adaptation	04626 Plant-pathogen interaction
Cluster_53828	"K13416,K13417"	Organismal Systems	Environmental adaptation	04626 Plant-pathogen interaction
Cluster_5384	K05391	Organismal Systems	Environmental adaptation	04626 Plant-pathogen interaction
Cluster_5385	"K06276,K07198,K14758,K08269,K13412"	Organismal Systems	Environmental adaptation	04626 Plant-pathogen interaction
Cluster_5394	"K13430,K13416"	Organismal Systems	Environmental adaptation	04626 Plant-pathogen interaction
Cluster_54	"K07466,K00815,K04079,K08081,K08503,K12616,K14497,K16196,K03243,K05391,K01915,K17982"	Organismal Systems	Environmental adaptation	04626 Plant-pathogen interaction
Cluster_54047	K13412	Organismal Systems	Environmental adaptation	04626 Plant-pathogen interaction
Cluster_54058	"K13430,K01183"	Organismal Systems	Environmental adaptation	04626 Plant-pathogen interaction
Cluster_54109	K05391	Organismal Systems	Environmental adaptation	04626 Plant-pathogen interaction
Cluster_54142	"K14517,K13433,K13432,K14516"	Organismal Systems	Environmental adaptation	04626 Plant-pathogen interaction
Cluster_54172	"K01930,K13457"	Organismal Systems	Environmental adaptation	04626 Plant-pathogen interaction
Cluster_54331	K16226	Organismal Systems	Environmental adaptation	04626 Plant-pathogen interaction
Cluster_54487	"K18835,K18834,K13423,K13424"	Organismal Systems	Environmental adaptation	04626 Plant-pathogen interaction
Cluster_5452	"K00891,K13459"	Organismal Systems	Environmental adaptation	04626 Plant-pathogen interaction
Cluster_54601	K13412	Organismal Systems	Environmental adaptation	04626 Plant-pathogen interaction
Cluster_5475	"K01183,K13430"	Organismal Systems	Environmental adaptation	04626 Plant-pathogen interaction
Cluster_5479	"K18834,K13424"	Organismal Systems	Environmental adaptation	04626 Plant-pathogen interaction
Cluster_54834	K02183	Organismal Systems	Environmental adaptation	04626 Plant-pathogen interaction
Cluster_5487	"K13424,K18835"	Organismal Systems	Environmental adaptation	04626 Plant-pathogen interaction
Cluster_5490	K13457	Organismal Systems	Environmental adaptation	04626 Plant-pathogen interaction
Cluster_54908	K05391	Organismal Systems	Environmental adaptation	04626 Plant-pathogen interaction
Cluster_5495	"K13436,K13459,K13416,K13415"	Organismal Systems	Environmental adaptation	04626 Plant-pathogen interaction
Cluster_54982	"K13436,K13430"	Organismal Systems	Environmental adaptation	04626 Plant-pathogen interaction
Cluster_55198	"K02259,K09422"	Organismal Systems	Environmental adaptation	04626 Plant-pathogen interaction
Cluster_55279	K12795	Organismal Systems	Environmental adaptation	04626 Plant-pathogen interaction
Cluster_55332	"K14309,K05349,K02183,K07466,K03283,K01115,K13414,K08852,K16226"	Organismal Systems	Environmental adaptation	04626 Plant-pathogen interaction
Cluster_55347	K13424	Organismal Systems	Environmental adaptation	04626 Plant-pathogen interaction
Cluster_5542	"K05349,K01183,K13415,K13430,K04382,K13459"	Organismal Systems	Environmental adaptation	04626 Plant-pathogen interaction
Cluster_555	"K13416,K13420,K13430"	Organismal Systems	Environmental adaptation	04626 Plant-pathogen interaction
Cluster_5561	"K01183,K13415,K01176,K13417,K13416"	Organismal Systems	Environmental adaptation	04626 Plant-pathogen interaction
Cluster_5567	K09487	Organismal Systems	Environmental adaptation	04626 Plant-pathogen interaction
Cluster_5577	"K13430,K01183"	Organismal Systems	Environmental adaptation	04626 Plant-pathogen interaction
Cluster_55957	"K13457,K01930"	Organismal Systems	Environmental adaptation	04626 Plant-pathogen interaction
Cluster_5596	"K13417,K01176,K18873,K13429,K13430,K01183,K13416"	Organismal Systems	Environmental adaptation	04626 Plant-pathogen interaction
Cluster_55971	"K01183,K13430"	Organismal Systems	Environmental adaptation	04626 Plant-pathogen interaction
Cluster_5611	"K13417,K13415,K13416"	Organismal Systems	Environmental adaptation	04626 Plant-pathogen interaction
Cluster_5627	"K01006,K05658,K14416,K03136,K13428,K13420,K12741,K14457,K00559,K01456,K12882,K04077,K00434,K01623,K03283,K17982,K04392,K07374,K12619,K01876,K01209,K02350"	Organismal Systems	Environmental adaptation	04626 Plant-pathogen interaction
Cluster_56378	K13412	Organismal Systems	Environmental adaptation	04626 Plant-pathogen interaction
Cluster_56527	K09487	Organismal Systems	Environmental adaptation	04626 Plant-pathogen interaction
Cluster_56599	K13416	Organismal Systems	Environmental adaptation	04626 Plant-pathogen interaction
Cluster_566	"K13430,K13416,K16224"	Organismal Systems	Environmental adaptation	04626 Plant-pathogen interaction
Cluster_56649	K01373	Organismal Systems	Environmental adaptation	04626 Plant-pathogen interaction
Cluster_56659	"K18873,K01183,K13430"	Organismal Systems	Environmental adaptation	04626 Plant-pathogen interaction
Cluster_5668	"K13416,K01176,K01183,K13430,K13415"	Organismal Systems	Environmental adaptation	04626 Plant-pathogen interaction
Cluster_5683	"K08269,K04368,K13414"	Organismal Systems	Environmental adaptation	04626 Plant-pathogen interaction
Cluster_56917	"K01183,K13415,K13430,K13459"	Organismal Systems	Environmental adaptation	04626 Plant-pathogen interaction
Cluster_5703	"K13417,K13415,K13416"	Organismal Systems	Environmental adaptation	04626 Plant-pathogen interaction
Cluster_57032	"K16225,K03283,K08852,K16911,K13457"	Organismal Systems	Environmental adaptation	04626 Plant-pathogen interaction
Cluster_57051	K13457	Organismal Systems	Environmental adaptation	04626 Plant-pathogen interaction
Cluster_57089	K13412	Organismal Systems	Environmental adaptation	04626 Plant-pathogen interaction
Cluster_5712	K12795	Organismal Systems	Environmental adaptation	04626 Plant-pathogen interaction
Cluster_57148	K02183	Organismal Systems	Environmental adaptation	04626 Plant-pathogen interaction
Cluster_5718	"K13416,K13430"	Organismal Systems	Environmental adaptation	04626 Plant-pathogen interaction
Cluster_5726	"K13459,K00162"	Organismal Systems	Environmental adaptation	04626 Plant-pathogen interaction
Cluster_57270	K13430	Organismal Systems	Environmental adaptation	04626 Plant-pathogen interaction
Cluster_5733	"K05349,K14309,K07466,K02183,K01115,K13414,K03283,K16226,K08852"	Organismal Systems	Environmental adaptation	04626 Plant-pathogen interaction
Cluster_57362	K18875	Organismal Systems	Environmental adaptation	04626 Plant-pathogen interaction
Cluster_57459	"K13416,K13417"	Organismal Systems	Environmental adaptation	04626 Plant-pathogen interaction
Cluster_57714	"K13496,K13430"	Organismal Systems	Environmental adaptation	04626 Plant-pathogen interaction
Cluster_579	"K16226,K08852,K16911,K01115,K13414,K16225,K03283,K07466,K02183,K05349,K14309"	Organismal Systems	Environmental adaptation	04626 Plant-pathogen interaction
Cluster_5802	K13447	Organismal Systems	Environmental adaptation	04626 Plant-pathogen interaction
Cluster_58094	K02183	Organismal Systems	Environmental adaptation	04626 Plant-pathogen interaction
Cluster_5816	"K13417,K13415,K13416"	Organismal Systems	Environmental adaptation	04626 Plant-pathogen interaction
Cluster_58247	"K13457,K12819"	Organismal Systems	Environmental adaptation	04626 Plant-pathogen interaction
Cluster_5826	"K13416,K01183,K13415,K13430,K01176,K13417"	Organismal Systems	Environmental adaptation	04626 Plant-pathogen interaction
Cluster_5829	"K13436,K14500,K13459,K13430"	Organismal Systems	Environmental adaptation	04626 Plant-pathogen interaction
Cluster_58327	K02183	Organismal Systems	Environmental adaptation	04626 Plant-pathogen interaction
Cluster_58447	"K13433,K13432,K14516,K14517"	Organismal Systems	Environmental adaptation	04626 Plant-pathogen interaction
Cluster_58507	K02183	Organismal Systems	Environmental adaptation	04626 Plant-pathogen interaction
Cluster_58596	"K05349,K14309,K07466,K02183,K01115,K13414,K03283,K08852"	Organismal Systems	Environmental adaptation	04626 Plant-pathogen interaction
Cluster_5867	"K13436,K13430"	Organismal Systems	Environmental adaptation	04626 Plant-pathogen interaction
Cluster_5872	K04368	Organismal Systems	Environmental adaptation	04626 Plant-pathogen interaction
Cluster_5877	"K03021,K13434,K14516,K14517"	Organismal Systems	Environmental adaptation	04626 Plant-pathogen interaction
Cluster_5889	"K13457,K13459"	Organismal Systems	Environmental adaptation	04626 Plant-pathogen interaction
Cluster_59196	"K13424,K13423"	Organismal Systems	Environmental adaptation	04626 Plant-pathogen interaction
Cluster_5931	"K04371,K14512"	Organismal Systems	Environmental adaptation	04626 Plant-pathogen interaction
Cluster_5932	"K13417,K13416"	Organismal Systems	Environmental adaptation	04626 Plant-pathogen interaction
Cluster_594	"K13414,K01115,K16225,K03283,K16226,K08852,K05349,K14309,K07466,K02183"	Organismal Systems	Environmental adaptation	04626 Plant-pathogen interaction
Cluster_59402	"K13413,K08269"	Organismal Systems	Environmental adaptation	04626 Plant-pathogen interaction
Cluster_59462	K01373	Organismal Systems	Environmental adaptation	04626 Plant-pathogen interaction
Cluster_59515	"K18873,K13430,K01183,K13416,K13436,K13459"	Organismal Systems	Environmental adaptation	04626 Plant-pathogen interaction
Cluster_59544	K02183	Organismal Systems	Environmental adaptation	04626 Plant-pathogen interaction
Cluster_59624	K01373	Organismal Systems	Environmental adaptation	04626 Plant-pathogen interaction
Cluster_5972	K13412	Organismal Systems	Environmental adaptation	04626 Plant-pathogen interaction
Cluster_59875	K02183	Organismal Systems	Environmental adaptation	04626 Plant-pathogen interaction
Cluster_599	K13412	Organismal Systems	Environmental adaptation	04626 Plant-pathogen interaction
Cluster_59911	"K01183,K13430,K13415,K13429,K13436"	Organismal Systems	Environmental adaptation	04626 Plant-pathogen interaction
Cluster_6008	K05391	Organismal Systems	Environmental adaptation	04626 Plant-pathogen interaction
Cluster_60093	K13412	Organismal Systems	Environmental adaptation	04626 Plant-pathogen interaction
Cluster_60107	"K01183,K00276,K13415,K13430,K12616"	Organismal Systems	Environmental adaptation	04626 Plant-pathogen interaction
Cluster_6011	K02183	Organismal Systems	Environmental adaptation	04626 Plant-pathogen interaction
Cluster_6012	"K01183,K13430"	Organismal Systems	Environmental adaptation	04626 Plant-pathogen interaction
Cluster_60131	"K13430,K13459,K13436"	Organismal Systems	Environmental adaptation	04626 Plant-pathogen interaction
Cluster_603	"K13415,K13430,K13416,K16224"	Organismal Systems	Environmental adaptation	04626 Plant-pathogen interaction
Cluster_60334	K13447	Organismal Systems	Environmental adaptation	04626 Plant-pathogen interaction
Cluster_60455	K13436	Organismal Systems	Environmental adaptation	04626 Plant-pathogen interaction
Cluster_60483	K13436	Organismal Systems	Environmental adaptation	04626 Plant-pathogen interaction
Cluster_60519	"K14517,K14516,K13432,K13434"	Organismal Systems	Environmental adaptation	04626 Plant-pathogen interaction
Cluster_6052	"K13412,K14758,K07198,K06276"	Organismal Systems	Environmental adaptation	04626 Plant-pathogen interaction
Cluster_60525	"K01176,K13415,K13430,K01183"	Organismal Systems	Environmental adaptation	04626 Plant-pathogen interaction
Cluster_60551	"K03644,K12882,K13420,K00430,K05658,K05356,K01006,K01115,K01188,K14760,K07374,K01623"	Organismal Systems	Environmental adaptation	04626 Plant-pathogen interaction
Cluster_6063	"K18873,K13430"	Organismal Systems	Environmental adaptation	04626 Plant-pathogen interaction
Cluster_60712	K02183	Organismal Systems	Environmental adaptation	04626 Plant-pathogen interaction
Cluster_60782	K05391	Organismal Systems	Environmental adaptation	04626 Plant-pathogen interaction
Cluster_60874	K18875	Organismal Systems	Environmental adaptation	04626 Plant-pathogen interaction
Cluster_60923	"K18835,K13424"	Organismal Systems	Environmental adaptation	04626 Plant-pathogen interaction
Cluster_60975	K05391	Organismal Systems	Environmental adaptation	04626 Plant-pathogen interaction
Cluster_6108	K13448	Organismal Systems	Environmental adaptation	04626 Plant-pathogen interaction
Cluster_61091	"K14517,K14516,K13432"	Organismal Systems	Environmental adaptation	04626 Plant-pathogen interaction
Cluster_61121	"K01183,K13416,K13436"	Organismal Systems	Environmental adaptation	04626 Plant-pathogen interaction
Cluster_6121	"K13434,K03021,K14516"	Organismal Systems	Environmental adaptation	04626 Plant-pathogen interaction
Cluster_61387	K13412	Organismal Systems	Environmental adaptation	04626 Plant-pathogen interaction
Cluster_6171	"K13416,K01183,K13430"	Organismal Systems	Environmental adaptation	04626 Plant-pathogen interaction
Cluster_61718	"K18873,K13430"	Organismal Systems	Environmental adaptation	04626 Plant-pathogen interaction
Cluster_618	K13412	Organismal Systems	Environmental adaptation	04626 Plant-pathogen interaction
Cluster_61863	K05391	Organismal Systems	Environmental adaptation	04626 Plant-pathogen interaction
Cluster_61990	"K13416,K13459,K18873,K13430,K13415"	Organismal Systems	Environmental adaptation	04626 Plant-pathogen interaction
Cluster_6212	"K13420,K13428,K13415"	Organismal Systems	Environmental adaptation	04626 Plant-pathogen interaction
Cluster_62254	"K13416,K01183,K13420"	Organismal Systems	Environmental adaptation	04626 Plant-pathogen interaction
Cluster_62658	K13412	Organismal Systems	Environmental adaptation	04626 Plant-pathogen interaction
Cluster_6279	"K13416,K13417"	Organismal Systems	Environmental adaptation	04626 Plant-pathogen interaction
Cluster_62844	K13412	Organismal Systems	Environmental adaptation	04626 Plant-pathogen interaction
Cluster_63	"K13420,K01507"	Organismal Systems	Environmental adaptation	04626 Plant-pathogen interaction
Cluster_630	"K17982,K08503,K04079,K08081,K01251,K07466,K12489,K05391,K03243,K14497,K12616"	Organismal Systems	Environmental adaptation	04626 Plant-pathogen interaction
Cluster_63237	K13448	Organismal Systems	Environmental adaptation	04626 Plant-pathogen interaction
Cluster_63280	K04079	Organismal Systems	Environmental adaptation	04626 Plant-pathogen interaction
Cluster_6333	"K04368,K13414,K07198"	Organismal Systems	Environmental adaptation	04626 Plant-pathogen interaction
Cluster_63381	K02183	Organismal Systems	Environmental adaptation	04626 Plant-pathogen interaction
Cluster_63399	K13424	Organismal Systems	Environmental adaptation	04626 Plant-pathogen interaction
Cluster_63425	K05391	Organismal Systems	Environmental adaptation	04626 Plant-pathogen interaction
Cluster_63543	K05391	Organismal Systems	Environmental adaptation	04626 Plant-pathogen interaction
Cluster_63546	K13412	Organismal Systems	Environmental adaptation	04626 Plant-pathogen interaction
Cluster_6359	"K07466,K02183,K05349,K14309,K16226,K08852,K16911,K13414,K01115,K03283"	Organismal Systems	Environmental adaptation	04626 Plant-pathogen interaction
Cluster_6367	K14512	Organismal Systems	Environmental adaptation	04626 Plant-pathogen interaction
Cluster_6394	"K13417,K13416"	Organismal Systems	Environmental adaptation	04626 Plant-pathogen interaction
Cluster_64013	K13436	Organismal Systems	Environmental adaptation	04626 Plant-pathogen interaction
Cluster_64146	"K13428,K13420,K13415,K13416"	Organismal Systems	Environmental adaptation	04626 Plant-pathogen interaction
Cluster_6420	"K13412,K14758,K07198"	Organismal Systems	Environmental adaptation	04626 Plant-pathogen interaction
Cluster_64430	K13412	Organismal Systems	Environmental adaptation	04626 Plant-pathogen interaction
Cluster_64444	"K14517,K14516,K13432,K03021,K13434"	Organismal Systems	Environmental adaptation	04626 Plant-pathogen interaction
Cluster_6446	K18875	Organismal Systems	Environmental adaptation	04626 Plant-pathogen interaction
Cluster_64495	K13436	Organismal Systems	Environmental adaptation	04626 Plant-pathogen interaction
Cluster_6467	"K13430,K13436"	Organismal Systems	Environmental adaptation	04626 Plant-pathogen interaction
Cluster_6498	"K01889,K04079,K01915"	Organismal Systems	Environmental adaptation	04626 Plant-pathogen interaction
Cluster_6504	"K13430,K13416"	Organismal Systems	Environmental adaptation	04626 Plant-pathogen interaction
Cluster_651	K13412	Organismal Systems	Environmental adaptation	04626 Plant-pathogen interaction
Cluster_6518	"K13412,K14758,K04688,K07198"	Organismal Systems	Environmental adaptation	04626 Plant-pathogen interaction
Cluster_65256	K13412	Organismal Systems	Environmental adaptation	04626 Plant-pathogen interaction
Cluster_6526	K04371	Organismal Systems	Environmental adaptation	04626 Plant-pathogen interaction
Cluster_6530	"K04688,K07198,K13412,K14758"	Organismal Systems	Environmental adaptation	04626 Plant-pathogen interaction
Cluster_6540	"K13416,K13436,K13417,K13430,K13415,K13429"	Organismal Systems	Environmental adaptation	04626 Plant-pathogen interaction
Cluster_6575	"K07198,K14758,K13412"	Organismal Systems	Environmental adaptation	04626 Plant-pathogen interaction
Cluster_6580	K13412	Organismal Systems	Environmental adaptation	04626 Plant-pathogen interaction
Cluster_6583	"K04688,K08269,K13414,K04368"	Organismal Systems	Environmental adaptation	04626 Plant-pathogen interaction
Cluster_6591	"K07466,K02183,K05349,K14309,K16226,K08852,K01115,K04646,K13414,K03283"	Organismal Systems	Environmental adaptation	04626 Plant-pathogen interaction
Cluster_6595	"K13412,K05857,K13354"	Organismal Systems	Environmental adaptation	04626 Plant-pathogen interaction
Cluster_6597	"K13459,K13415,K13420"	Organismal Systems	Environmental adaptation	04626 Plant-pathogen interaction
Cluster_66023	K13456	Organismal Systems	Environmental adaptation	04626 Plant-pathogen interaction
Cluster_66306	K09487	Organismal Systems	Environmental adaptation	04626 Plant-pathogen interaction
Cluster_66371	"K13510,K13412"	Organismal Systems	Environmental adaptation	04626 Plant-pathogen interaction
Cluster_6640	"K13436,K13430"	Organismal Systems	Environmental adaptation	04626 Plant-pathogen interaction
Cluster_66806	"K09422,K16166,K02259"	Organismal Systems	Environmental adaptation	04626 Plant-pathogen interaction
Cluster_6713	"K13416,K13459,K16224,K01176,K13417,K01183,K13430,K13415,K13429"	Organismal Systems	Environmental adaptation	04626 Plant-pathogen interaction
Cluster_6725	"K13416,K13417,K00276"	Organismal Systems	Environmental adaptation	04626 Plant-pathogen interaction
Cluster_6726	K05391	Organismal Systems	Environmental adaptation	04626 Plant-pathogen interaction
Cluster_67278	"K13429,K13420"	Organismal Systems	Environmental adaptation	04626 Plant-pathogen interaction
Cluster_67321	K13412	Organismal Systems	Environmental adaptation	04626 Plant-pathogen interaction
Cluster_67325	"K01373,K01365"	Organismal Systems	Environmental adaptation	04626 Plant-pathogen interaction
Cluster_6739	"K13416,K01176,K13417"	Organismal Systems	Environmental adaptation	04626 Plant-pathogen interaction
Cluster_67608	K13448	Organismal Systems	Environmental adaptation	04626 Plant-pathogen interaction
Cluster_6762	"K13417,K13416"	Organismal Systems	Environmental adaptation	04626 Plant-pathogen interaction
Cluster_677	"K16224,K13415,K13430,K13429"	Organismal Systems	Environmental adaptation	04626 Plant-pathogen interaction
Cluster_678	K13430	Organismal Systems	Environmental adaptation	04626 Plant-pathogen interaction
Cluster_6790	"K14516,K03021,K13433,K13434,K14517"	Organismal Systems	Environmental adaptation	04626 Plant-pathogen interaction
Cluster_67942	"K13416,K13415,K13420"	Organismal Systems	Environmental adaptation	04626 Plant-pathogen interaction
Cluster_68108	K12795	Organismal Systems	Environmental adaptation	04626 Plant-pathogen interaction
Cluster_68114	K12795	Organismal Systems	Environmental adaptation	04626 Plant-pathogen interaction
Cluster_6814	"K13412,K08852,K16226,K13459,K16225,K03283"	Organismal Systems	Environmental adaptation	04626 Plant-pathogen interaction
Cluster_6819	"K01183,K13430,K13415,K13459"	Organismal Systems	Environmental adaptation	04626 Plant-pathogen interaction
Cluster_6861	K13414	Organismal Systems	Environmental adaptation	04626 Plant-pathogen interaction
Cluster_68662	"K13424,K18835"	Organismal Systems	Environmental adaptation	04626 Plant-pathogen interaction
Cluster_68670	"K13423,K13424"	Organismal Systems	Environmental adaptation	04626 Plant-pathogen interaction
Cluster_688	"K13416,K13417,K13415"	Organismal Systems	Environmental adaptation	04626 Plant-pathogen interaction
Cluster_6884	K13436	Organismal Systems	Environmental adaptation	04626 Plant-pathogen interaction
Cluster_6887	"K01183,K13430,K13415,K13416"	Organismal Systems	Environmental adaptation	04626 Plant-pathogen interaction
Cluster_68872	"K18835,K13424"	Organismal Systems	Environmental adaptation	04626 Plant-pathogen interaction
Cluster_68964	K04079	Organismal Systems	Environmental adaptation	04626 Plant-pathogen interaction
Cluster_6903	"K13428,K13420,K13415"	Organismal Systems	Environmental adaptation	04626 Plant-pathogen interaction
Cluster_69045	K13412	Organismal Systems	Environmental adaptation	04626 Plant-pathogen interaction
Cluster_6933	"K13416,K13430,K13415,K13420"	Organismal Systems	Environmental adaptation	04626 Plant-pathogen interaction
Cluster_6935	K13457	Organismal Systems	Environmental adaptation	04626 Plant-pathogen interaction
Cluster_6937	"K13434,K19720,K06236"	Organismal Systems	Environmental adaptation	04626 Plant-pathogen interaction
Cluster_69378	K13436	Organismal Systems	Environmental adaptation	04626 Plant-pathogen interaction
Cluster_69424	"K02183,K13448"	Organismal Systems	Environmental adaptation	04626 Plant-pathogen interaction
Cluster_69457	K02183	Organismal Systems	Environmental adaptation	04626 Plant-pathogen interaction
Cluster_69536	K13412	Organismal Systems	Environmental adaptation	04626 Plant-pathogen interaction
Cluster_6958	"K16224,K13436,K13459,K13430,K01183"	Organismal Systems	Environmental adaptation	04626 Plant-pathogen interaction
Cluster_696	K13420	Organismal Systems	Environmental adaptation	04626 Plant-pathogen interaction
Cluster_70031	"K01183,K13416,K13436"	Organismal Systems	Environmental adaptation	04626 Plant-pathogen interaction
Cluster_7026	"K13420,K13415"	Organismal Systems	Environmental adaptation	04626 Plant-pathogen interaction
Cluster_70282	"K01930,K13457"	Organismal Systems	Environmental adaptation	04626 Plant-pathogen interaction
Cluster_7033	"K13459,K13126"	Organismal Systems	Environmental adaptation	04626 Plant-pathogen interaction
Cluster_7043	K15397	Organismal Systems	Environmental adaptation	04626 Plant-pathogen interaction
Cluster_7049	K02183	Organismal Systems	Environmental adaptation	04626 Plant-pathogen interaction
Cluster_7053	"K12795,K03283,K13342,K09561"	Organismal Systems	Environmental adaptation	04626 Plant-pathogen interaction
Cluster_70548	K13424	Organismal Systems	Environmental adaptation	04626 Plant-pathogen interaction
Cluster_70641	K13459	Organismal Systems	Environmental adaptation	04626 Plant-pathogen interaction
Cluster_70776	"K13425,K18834"	Organismal Systems	Environmental adaptation	04626 Plant-pathogen interaction
Cluster_71036	"K18873,K13430"	Organismal Systems	Environmental adaptation	04626 Plant-pathogen interaction
Cluster_7121	"K01915,K01889,K04079"	Organismal Systems	Environmental adaptation	04626 Plant-pathogen interaction
Cluster_71307	"K11147,K13416,K13420,K00276,K13417"	Organismal Systems	Environmental adaptation	04626 Plant-pathogen interaction
Cluster_71321	"K02259,K09422"	Organismal Systems	Environmental adaptation	04626 Plant-pathogen interaction
Cluster_71330	K12795	Organismal Systems	Environmental adaptation	04626 Plant-pathogen interaction
Cluster_71349	K13412	Organismal Systems	Environmental adaptation	04626 Plant-pathogen interaction
Cluster_71417	"K13430,K01183"	Organismal Systems	Environmental adaptation	04626 Plant-pathogen interaction
Cluster_7142	"K13430,K18873"	Organismal Systems	Environmental adaptation	04626 Plant-pathogen interaction
Cluster_7151	"K18835,K13424"	Organismal Systems	Environmental adaptation	04626 Plant-pathogen interaction
Cluster_71591	K04079	Organismal Systems	Environmental adaptation	04626 Plant-pathogen interaction
Cluster_7188	"K13434,K14516,K14517"	Organismal Systems	Environmental adaptation	04626 Plant-pathogen interaction
Cluster_72031	K13412	Organismal Systems	Environmental adaptation	04626 Plant-pathogen interaction
Cluster_7252	K18875	Organismal Systems	Environmental adaptation	04626 Plant-pathogen interaction
Cluster_72602	K02183	Organismal Systems	Environmental adaptation	04626 Plant-pathogen interaction
Cluster_72726	K13448	Organismal Systems	Environmental adaptation	04626 Plant-pathogen interaction
Cluster_7280	"K06236,K13434,K19720"	Organismal Systems	Environmental adaptation	04626 Plant-pathogen interaction
Cluster_72846	K04079	Organismal Systems	Environmental adaptation	04626 Plant-pathogen interaction
Cluster_72979	K13436	Organismal Systems	Environmental adaptation	04626 Plant-pathogen interaction
Cluster_72998	K02183	Organismal Systems	Environmental adaptation	04626 Plant-pathogen interaction
Cluster_73083	"K14309,K16225,K03283,K16911"	Organismal Systems	Environmental adaptation	04626 Plant-pathogen interaction
Cluster_73208	"K13436,K14510"	Organismal Systems	Environmental adaptation	04626 Plant-pathogen interaction
Cluster_7343	K13412	Organismal Systems	Environmental adaptation	04626 Plant-pathogen interaction
Cluster_7363	"K01183,K13416"	Organismal Systems	Environmental adaptation	04626 Plant-pathogen interaction
Cluster_73754	K13448	Organismal Systems	Environmental adaptation	04626 Plant-pathogen interaction
Cluster_7376	"K13429,K13430,K13415,K13420,K13436"	Organismal Systems	Environmental adaptation	04626 Plant-pathogen interaction
Cluster_73776	K13412	Organismal Systems	Environmental adaptation	04626 Plant-pathogen interaction
Cluster_7379	"K03021,K13434,K14516,K14517"	Organismal Systems	Environmental adaptation	04626 Plant-pathogen interaction
Cluster_73799	"K13432,K13433,K03021,K13434,K14516,K14517,K01689"	Organismal Systems	Environmental adaptation	04626 Plant-pathogen interaction
Cluster_7396	"K13459,K13416,K13430,K13417"	Organismal Systems	Environmental adaptation	04626 Plant-pathogen interaction
Cluster_73976	"K18835,K13423,K13424"	Organismal Systems	Environmental adaptation	04626 Plant-pathogen interaction
Cluster_74173	K13412	Organismal Systems	Environmental adaptation	04626 Plant-pathogen interaction
Cluster_7445	K13420	Organismal Systems	Environmental adaptation	04626 Plant-pathogen interaction
Cluster_7455	K13414	Organismal Systems	Environmental adaptation	04626 Plant-pathogen interaction
Cluster_7461	"K13415,K13420,K13436,K13416"	Organismal Systems	Environmental adaptation	04626 Plant-pathogen interaction
Cluster_74634	K13423	Organismal Systems	Environmental adaptation	04626 Plant-pathogen interaction
Cluster_74655	K05391	Organismal Systems	Environmental adaptation	04626 Plant-pathogen interaction
Cluster_74715	"K13424,K18835"	Organismal Systems	Environmental adaptation	04626 Plant-pathogen interaction
Cluster_7507	"K13417,K13416"	Organismal Systems	Environmental adaptation	04626 Plant-pathogen interaction
Cluster_751	"K16226,K08852,K16911,K16225,K03283,K13414,K01115,K02183,K07466,K14309,K05349"	Organismal Systems	Environmental adaptation	04626 Plant-pathogen interaction
Cluster_7518	K13430	Organismal Systems	Environmental adaptation	04626 Plant-pathogen interaction
Cluster_75181	K13448	Organismal Systems	Environmental adaptation	04626 Plant-pathogen interaction
Cluster_7520	K13425	Organismal Systems	Environmental adaptation	04626 Plant-pathogen interaction
Cluster_7522	"K06276,K07198,K14758,K13412"	Organismal Systems	Environmental adaptation	04626 Plant-pathogen interaction
Cluster_7526	"K18835,K18834,K13424"	Organismal Systems	Environmental adaptation	04626 Plant-pathogen interaction
Cluster_7527	"K13460,K13459"	Organismal Systems	Environmental adaptation	04626 Plant-pathogen interaction
Cluster_75322	K04079	Organismal Systems	Environmental adaptation	04626 Plant-pathogen interaction
Cluster_7537	"K13430,K13416"	Organismal Systems	Environmental adaptation	04626 Plant-pathogen interaction
Cluster_7545	"K01365,K01373"	Organismal Systems	Environmental adaptation	04626 Plant-pathogen interaction
Cluster_75468	"K15777,K13459"	Organismal Systems	Environmental adaptation	04626 Plant-pathogen interaction
Cluster_75754	"K13496,K13430"	Organismal Systems	Environmental adaptation	04626 Plant-pathogen interaction
Cluster_75759	K13412	Organismal Systems	Environmental adaptation	04626 Plant-pathogen interaction
Cluster_7585	"K02183,K13412"	Organismal Systems	Environmental adaptation	04626 Plant-pathogen interaction
Cluster_75855	K02183	Organismal Systems	Environmental adaptation	04626 Plant-pathogen interaction
Cluster_7586	"K13424,K18835,K18834"	Organismal Systems	Environmental adaptation	04626 Plant-pathogen interaction
Cluster_75953	"K08852,K01115,K13414,K03283,K07466,K02183,K05349,K14309"	Organismal Systems	Environmental adaptation	04626 Plant-pathogen interaction
Cluster_75978	"K16224,K13436,K13416,K13417"	Organismal Systems	Environmental adaptation	04626 Plant-pathogen interaction
Cluster_7603	"K08269,K13414,K14510,K13429"	Organismal Systems	Environmental adaptation	04626 Plant-pathogen interaction
Cluster_76140	K04079	Organismal Systems	Environmental adaptation	04626 Plant-pathogen interaction
Cluster_76267	K09487	Organismal Systems	Environmental adaptation	04626 Plant-pathogen interaction
Cluster_7634	"K13354,K05857,K13412,K14406"	Organismal Systems	Environmental adaptation	04626 Plant-pathogen interaction
Cluster_7649	K18875	Organismal Systems	Environmental adaptation	04626 Plant-pathogen interaction
Cluster_7658	"K18835,K18834,K13424"	Organismal Systems	Environmental adaptation	04626 Plant-pathogen interaction
Cluster_7663	K13430	Organismal Systems	Environmental adaptation	04626 Plant-pathogen interaction
Cluster_7674	K05391	Organismal Systems	Environmental adaptation	04626 Plant-pathogen interaction
Cluster_76783	K13458	Organismal Systems	Environmental adaptation	04626 Plant-pathogen interaction
Cluster_7679	"K13417,K13430,K13416"	Organismal Systems	Environmental adaptation	04626 Plant-pathogen interaction
Cluster_77272	"K08852,K16225,K03283"	Organismal Systems	Environmental adaptation	04626 Plant-pathogen interaction
Cluster_77289	K02183	Organismal Systems	Environmental adaptation	04626 Plant-pathogen interaction
Cluster_7742	"K13415,K13420"	Organismal Systems	Environmental adaptation	04626 Plant-pathogen interaction
Cluster_7754	K13412	Organismal Systems	Environmental adaptation	04626 Plant-pathogen interaction
Cluster_77548	K13412	Organismal Systems	Environmental adaptation	04626 Plant-pathogen interaction
Cluster_776	"K05666,K13356,K13457,K15086,K05605,K01191,K16196,K05756,K00566,K12819,K01738"	Organismal Systems	Environmental adaptation	04626 Plant-pathogen interaction
Cluster_77669	K13436	Organismal Systems	Environmental adaptation	04626 Plant-pathogen interaction
Cluster_778	"K13459,K01455,K13416,K07178,K13430,K01176,K01074,K13417,K13800"	Organismal Systems	Environmental adaptation	04626 Plant-pathogen interaction
Cluster_77942	K13424	Organismal Systems	Environmental adaptation	04626 Plant-pathogen interaction
Cluster_77991	K13430	Organismal Systems	Environmental adaptation	04626 Plant-pathogen interaction
Cluster_78330	K09487	Organismal Systems	Environmental adaptation	04626 Plant-pathogen interaction
Cluster_78367	K13457	Organismal Systems	Environmental adaptation	04626 Plant-pathogen interaction
Cluster_7845	K02183	Organismal Systems	Environmental adaptation	04626 Plant-pathogen interaction
Cluster_78678	K13412	Organismal Systems	Environmental adaptation	04626 Plant-pathogen interaction
Cluster_7884	K13430	Organismal Systems	Environmental adaptation	04626 Plant-pathogen interaction
Cluster_7887	"K13432,K13434,K14516,K14517"	Organismal Systems	Environmental adaptation	04626 Plant-pathogen interaction
Cluster_7894	"K01689,K14516,K03021,K13434"	Organismal Systems	Environmental adaptation	04626 Plant-pathogen interaction
Cluster_7911	"K13415,K13420,K13428"	Organismal Systems	Environmental adaptation	04626 Plant-pathogen interaction
Cluster_7912	"K06236,K19720,K13434"	Organismal Systems	Environmental adaptation	04626 Plant-pathogen interaction
Cluster_7922	"K13412,K04371,K03097,K03083,K14512,K06276"	Organismal Systems	Environmental adaptation	04626 Plant-pathogen interaction
Cluster_793	"K02183,K04706,K07466,K13457,K14309,K16911,K08852,K16226,K03283,K16225,K01115,K04646,K13414,K14314"	Organismal Systems	Environmental adaptation	04626 Plant-pathogen interaction
Cluster_7959	K13412	Organismal Systems	Environmental adaptation	04626 Plant-pathogen interaction
Cluster_7963	"K13417,K01183,K13416"	Organismal Systems	Environmental adaptation	04626 Plant-pathogen interaction
Cluster_79878	"K01930,K13457"	Organismal Systems	Environmental adaptation	04626 Plant-pathogen interaction
Cluster_79924	"K16224,K13430"	Organismal Systems	Environmental adaptation	04626 Plant-pathogen interaction
Cluster_80	"K13459,K08852,K16226,K16911,K16225,K03283,K12819,K13457,K00514,K14309"	Organismal Systems	Environmental adaptation	04626 Plant-pathogen interaction
Cluster_80171	"K01183,K13430"	Organismal Systems	Environmental adaptation	04626 Plant-pathogen interaction
Cluster_8030	"K13430,K13429,K13436"	Organismal Systems	Environmental adaptation	04626 Plant-pathogen interaction
Cluster_8045	"K13425,K13426"	Organismal Systems	Environmental adaptation	04626 Plant-pathogen interaction
Cluster_8052	"K18835,K13423,K13424"	Organismal Systems	Environmental adaptation	04626 Plant-pathogen interaction
Cluster_80614	"K16224,K13436,K13430,K13415"	Organismal Systems	Environmental adaptation	04626 Plant-pathogen interaction
Cluster_8071	"K13416,K13430"	Organismal Systems	Environmental adaptation	04626 Plant-pathogen interaction
Cluster_8093	"K05857,K13412,K13354,K13448,K02183"	Organismal Systems	Environmental adaptation	04626 Plant-pathogen interaction
Cluster_80987	"K14517,K14516,K03021,K13433,K13432,K13434"	Organismal Systems	Environmental adaptation	04626 Plant-pathogen interaction
Cluster_8108	"K13424,K18835,K18834"	Organismal Systems	Environmental adaptation	04626 Plant-pathogen interaction
Cluster_8116	"K18835,K13423,K13424"	Organismal Systems	Environmental adaptation	04626 Plant-pathogen interaction
Cluster_812	K13412	Organismal Systems	Environmental adaptation	04626 Plant-pathogen interaction
Cluster_81249	K13412	Organismal Systems	Environmental adaptation	04626 Plant-pathogen interaction
Cluster_8128	K16224	Organismal Systems	Environmental adaptation	04626 Plant-pathogen interaction
Cluster_8130	K09487	Organismal Systems	Environmental adaptation	04626 Plant-pathogen interaction
Cluster_8142	"K16226,K03283,K16225"	Organismal Systems	Environmental adaptation	04626 Plant-pathogen interaction
Cluster_81698	K02183	Organismal Systems	Environmental adaptation	04626 Plant-pathogen interaction
Cluster_81769	"K13430,K18873"	Organismal Systems	Environmental adaptation	04626 Plant-pathogen interaction
Cluster_81784	"K13430,K13429,K01183"	Organismal Systems	Environmental adaptation	04626 Plant-pathogen interaction
Cluster_8193	K13427	Organismal Systems	Environmental adaptation	04626 Plant-pathogen interaction
Cluster_82008	"K13416,K13459,K13417,K01176,K00276,K13420,K01183"	Organismal Systems	Environmental adaptation	04626 Plant-pathogen interaction
Cluster_82045	K13448	Organismal Systems	Environmental adaptation	04626 Plant-pathogen interaction
Cluster_8219	"K13414,K04368,K08269"	Organismal Systems	Environmental adaptation	04626 Plant-pathogen interaction
Cluster_82225	K09487	Organismal Systems	Environmental adaptation	04626 Plant-pathogen interaction
Cluster_82443	K13459	Organismal Systems	Environmental adaptation	04626 Plant-pathogen interaction
Cluster_82531	"K18835,K18834,K13424"	Organismal Systems	Environmental adaptation	04626 Plant-pathogen interaction
Cluster_8262	K13430	Organismal Systems	Environmental adaptation	04626 Plant-pathogen interaction
Cluster_827	K13416	Organismal Systems	Environmental adaptation	04626 Plant-pathogen interaction
Cluster_8273	"K13415,K13428,K13420,K13417,K16224,K13416"	Organismal Systems	Environmental adaptation	04626 Plant-pathogen interaction
Cluster_8283	"K13417,K13415,K13416"	Organismal Systems	Environmental adaptation	04626 Plant-pathogen interaction
Cluster_83035	K18835	Organismal Systems	Environmental adaptation	04626 Plant-pathogen interaction
Cluster_83107	K02183	Organismal Systems	Environmental adaptation	04626 Plant-pathogen interaction
Cluster_8320	"K04371,K14512"	Organismal Systems	Environmental adaptation	04626 Plant-pathogen interaction
Cluster_83378	"K01183,K13430"	Organismal Systems	Environmental adaptation	04626 Plant-pathogen interaction
Cluster_83385	"K01183,K13416,K13436"	Organismal Systems	Environmental adaptation	04626 Plant-pathogen interaction
Cluster_83511	K13412	Organismal Systems	Environmental adaptation	04626 Plant-pathogen interaction
Cluster_8367	"K03231,K02183,K14411,K13412,K13126"	Organismal Systems	Environmental adaptation	04626 Plant-pathogen interaction
Cluster_8376	"K09422,K02259"	Organismal Systems	Environmental adaptation	04626 Plant-pathogen interaction
Cluster_83819	"K00276,K01183,K13420,K13417,K01176,K13436,K13459,K13416"	Organismal Systems	Environmental adaptation	04626 Plant-pathogen interaction
Cluster_8388	"K13459,K13126,K02113"	Organismal Systems	Environmental adaptation	04626 Plant-pathogen interaction
Cluster_84	"K14442,K01074,K01176,K13800,K00901,K00857,K13457,K04506,K07178,K01455,K08678"	Organismal Systems	Environmental adaptation	04626 Plant-pathogen interaction
Cluster_8405	"K13424,K18834,K18835"	Organismal Systems	Environmental adaptation	04626 Plant-pathogen interaction
Cluster_84107	"K13423,K13424"	Organismal Systems	Environmental adaptation	04626 Plant-pathogen interaction
Cluster_84202	"K13430,K13436"	Organismal Systems	Environmental adaptation	04626 Plant-pathogen interaction
Cluster_8428	"K16224,K13416,K13429,K13430,K13415,K13417"	Organismal Systems	Environmental adaptation	04626 Plant-pathogen interaction
Cluster_84696	K02183	Organismal Systems	Environmental adaptation	04626 Plant-pathogen interaction
Cluster_8487	"K13430,K13429,K16224"	Organismal Systems	Environmental adaptation	04626 Plant-pathogen interaction
Cluster_84905	K09487	Organismal Systems	Environmental adaptation	04626 Plant-pathogen interaction
Cluster_850	"K13420,K13428,K13415"	Organismal Systems	Environmental adaptation	04626 Plant-pathogen interaction
Cluster_85005	"K09422,K02259,K16166"	Organismal Systems	Environmental adaptation	04626 Plant-pathogen interaction
Cluster_8501	"K18835,K13424"	Organismal Systems	Environmental adaptation	04626 Plant-pathogen interaction
Cluster_8513	"K14517,K13434,K13432,K14516"	Organismal Systems	Environmental adaptation	04626 Plant-pathogen interaction
Cluster_8516	"K13430,K18873"	Organismal Systems	Environmental adaptation	04626 Plant-pathogen interaction
Cluster_85531	K13416	Organismal Systems	Environmental adaptation	04626 Plant-pathogen interaction
Cluster_8572	K13430	Organismal Systems	Environmental adaptation	04626 Plant-pathogen interaction
Cluster_8599	"K16225,K03283,K16226,K08852,K14309,K13457"	Organismal Systems	Environmental adaptation	04626 Plant-pathogen interaction
Cluster_8603	K00864	Organismal Systems	Environmental adaptation	04626 Plant-pathogen interaction
Cluster_86112	"K01176,K13415,K01183,K13416,K13459"	Organismal Systems	Environmental adaptation	04626 Plant-pathogen interaction
Cluster_8612	K13430	Organismal Systems	Environmental adaptation	04626 Plant-pathogen interaction
Cluster_8642	"K13417,K13430,K01183,K03283,K13416"	Organismal Systems	Environmental adaptation	04626 Plant-pathogen interaction
Cluster_8667	"K13417,K13416"	Organismal Systems	Environmental adaptation	04626 Plant-pathogen interaction
Cluster_8672	"K13415,K13417,K16224"	Organismal Systems	Environmental adaptation	04626 Plant-pathogen interaction
Cluster_86771	"K13428,K13420,K13415,K01886"	Organismal Systems	Environmental adaptation	04626 Plant-pathogen interaction
Cluster_868	"K05349,K14309,K07466,K02183,K01115,K04646,K13414,K16225,K03283,K16226,K08852"	Organismal Systems	Environmental adaptation	04626 Plant-pathogen interaction
Cluster_87025	K13412	Organismal Systems	Environmental adaptation	04626 Plant-pathogen interaction
Cluster_87097	"K13417,K01183,K13416,K13436"	Organismal Systems	Environmental adaptation	04626 Plant-pathogen interaction
Cluster_87169	K13448	Organismal Systems	Environmental adaptation	04626 Plant-pathogen interaction
Cluster_875	"K13420,K13416"	Organismal Systems	Environmental adaptation	04626 Plant-pathogen interaction
Cluster_8751	K13412	Organismal Systems	Environmental adaptation	04626 Plant-pathogen interaction
Cluster_8763	K13412	Organismal Systems	Environmental adaptation	04626 Plant-pathogen interaction
Cluster_87636	K02183	Organismal Systems	Environmental adaptation	04626 Plant-pathogen interaction
Cluster_8776	"K13420,K02146,K13415,K13416"	Organismal Systems	Environmental adaptation	04626 Plant-pathogen interaction
Cluster_88008	K02183	Organismal Systems	Environmental adaptation	04626 Plant-pathogen interaction
Cluster_88019	K13412	Organismal Systems	Environmental adaptation	04626 Plant-pathogen interaction
Cluster_8808	"K13430,K14432"	Organismal Systems	Environmental adaptation	04626 Plant-pathogen interaction
Cluster_8814	"K13430,K13459,K13416"	Organismal Systems	Environmental adaptation	04626 Plant-pathogen interaction
Cluster_8816	"K13416,K13417"	Organismal Systems	Environmental adaptation	04626 Plant-pathogen interaction
Cluster_8834	K13430	Organismal Systems	Environmental adaptation	04626 Plant-pathogen interaction
Cluster_8880	"K13415,K13430,K01183,K13436"	Organismal Systems	Environmental adaptation	04626 Plant-pathogen interaction
Cluster_88802	"K01930,K13457"	Organismal Systems	Environmental adaptation	04626 Plant-pathogen interaction
Cluster_8885	"K18834,K18835,K13424,K13423"	Organismal Systems	Environmental adaptation	04626 Plant-pathogen interaction
Cluster_88941	K13430	Organismal Systems	Environmental adaptation	04626 Plant-pathogen interaction
Cluster_8901	K13430	Organismal Systems	Environmental adaptation	04626 Plant-pathogen interaction
Cluster_89085	K13456	Organismal Systems	Environmental adaptation	04626 Plant-pathogen interaction
Cluster_8910	K13434	Organismal Systems	Environmental adaptation	04626 Plant-pathogen interaction
Cluster_89109	"K14517,K13434,K13432,K14516"	Organismal Systems	Environmental adaptation	04626 Plant-pathogen interaction
Cluster_8916	"K13460,K13459"	Organismal Systems	Environmental adaptation	04626 Plant-pathogen interaction
Cluster_8947	K13416	Organismal Systems	Environmental adaptation	04626 Plant-pathogen interaction
Cluster_8956	"K02183,K13448,K13354,K05857,K13412"	Organismal Systems	Environmental adaptation	04626 Plant-pathogen interaction
Cluster_8958	"K13416,K13430"	Organismal Systems	Environmental adaptation	04626 Plant-pathogen interaction
Cluster_897	"K04368,K13413,K13414"	Organismal Systems	Environmental adaptation	04626 Plant-pathogen interaction
Cluster_9030	"K13430,K01183,K13417,K13416,K04382"	Organismal Systems	Environmental adaptation	04626 Plant-pathogen interaction
Cluster_9062	"K14512,K04371"	Organismal Systems	Environmental adaptation	04626 Plant-pathogen interaction
Cluster_9086	K13424	Organismal Systems	Environmental adaptation	04626 Plant-pathogen interaction
Cluster_91085	"K18873,K01183,K13415,K13416"	Organismal Systems	Environmental adaptation	04626 Plant-pathogen interaction
Cluster_91139	K13436	Organismal Systems	Environmental adaptation	04626 Plant-pathogen interaction
Cluster_9168	"K14758,K13412,K04688"	Organismal Systems	Environmental adaptation	04626 Plant-pathogen interaction
Cluster_917	"K14546,K02183"	Organismal Systems	Environmental adaptation	04626 Plant-pathogen interaction
Cluster_9175	"K03097,K14758,K13412,K06276"	Organismal Systems	Environmental adaptation	04626 Plant-pathogen interaction
Cluster_9179	"K13457,K13459,K08852,K16911,K03283,K16225"	Organismal Systems	Environmental adaptation	04626 Plant-pathogen interaction
Cluster_919	"K01115,K13414,K03283,K16225,K16226,K08852,K16911,K14309,K13457,K07466,K02183"	Organismal Systems	Environmental adaptation	04626 Plant-pathogen interaction
Cluster_9193	K15397	Organismal Systems	Environmental adaptation	04626 Plant-pathogen interaction
Cluster_921	"K13459,K16225"	Organismal Systems	Environmental adaptation	04626 Plant-pathogen interaction
Cluster_92231	K13412	Organismal Systems	Environmental adaptation	04626 Plant-pathogen interaction
Cluster_92245	K02183	Organismal Systems	Environmental adaptation	04626 Plant-pathogen interaction
Cluster_923	"K13430,K13436"	Organismal Systems	Environmental adaptation	04626 Plant-pathogen interaction
Cluster_92569	K02183	Organismal Systems	Environmental adaptation	04626 Plant-pathogen interaction
Cluster_92580	K13430	Organismal Systems	Environmental adaptation	04626 Plant-pathogen interaction
Cluster_9272	K13414	Organismal Systems	Environmental adaptation	04626 Plant-pathogen interaction
Cluster_9311	K13414	Organismal Systems	Environmental adaptation	04626 Plant-pathogen interaction
Cluster_9341	"K18873,K13429,K13430"	Organismal Systems	Environmental adaptation	04626 Plant-pathogen interaction
Cluster_93430	K13412	Organismal Systems	Environmental adaptation	04626 Plant-pathogen interaction
Cluster_9346	K05391	Organismal Systems	Environmental adaptation	04626 Plant-pathogen interaction
Cluster_9354	K13430	Organismal Systems	Environmental adaptation	04626 Plant-pathogen interaction
Cluster_936	"K03243,K05391,K07466,K15402,K08503,K04079,K17982"	Organismal Systems	Environmental adaptation	04626 Plant-pathogen interaction
Cluster_93831	K13436	Organismal Systems	Environmental adaptation	04626 Plant-pathogen interaction
Cluster_9392	K13459	Organismal Systems	Environmental adaptation	04626 Plant-pathogen interaction
Cluster_940	"K01535,K16166,K00166,K02259,K09422"	Organismal Systems	Environmental adaptation	04626 Plant-pathogen interaction
Cluster_94143	K13416	Organismal Systems	Environmental adaptation	04626 Plant-pathogen interaction
Cluster_9423	"K13459,K13416,K01183,K13430"	Organismal Systems	Environmental adaptation	04626 Plant-pathogen interaction
Cluster_948	K05391	Organismal Systems	Environmental adaptation	04626 Plant-pathogen interaction
Cluster_94968	"K03283,K13414,K04646,K01115,K08852,K14309,K05349,K02183,K07466"	Organismal Systems	Environmental adaptation	04626 Plant-pathogen interaction
Cluster_94981	"K18835,K13423,K13424"	Organismal Systems	Environmental adaptation	04626 Plant-pathogen interaction
Cluster_9506	"K16224,K18873,K13415,K13430"	Organismal Systems	Environmental adaptation	04626 Plant-pathogen interaction
Cluster_9508	"K13430,K13436"	Organismal Systems	Environmental adaptation	04626 Plant-pathogen interaction
Cluster_95192	K13459	Organismal Systems	Environmental adaptation	04626 Plant-pathogen interaction
Cluster_9527	K13447	Organismal Systems	Environmental adaptation	04626 Plant-pathogen interaction
Cluster_95305	K13412	Organismal Systems	Environmental adaptation	04626 Plant-pathogen interaction
Cluster_9535	"K13428,K13420"	Organismal Systems	Environmental adaptation	04626 Plant-pathogen interaction
Cluster_95378	"K07466,K02183,K13414,K01115,K03283,K16226,K08852"	Organismal Systems	Environmental adaptation	04626 Plant-pathogen interaction
Cluster_9551	"K13415,K13428,K13420"	Organismal Systems	Environmental adaptation	04626 Plant-pathogen interaction
Cluster_95586	K13416	Organismal Systems	Environmental adaptation	04626 Plant-pathogen interaction
Cluster_95588	"K13459,K15777"	Organismal Systems	Environmental adaptation	04626 Plant-pathogen interaction
Cluster_9580	"K13428,K13420,K13415,K01886"	Organismal Systems	Environmental adaptation	04626 Plant-pathogen interaction
Cluster_9592	K13448	Organismal Systems	Environmental adaptation	04626 Plant-pathogen interaction
Cluster_9630	"K01183,K13416"	Organismal Systems	Environmental adaptation	04626 Plant-pathogen interaction
Cluster_9661	"K13412,K14758"	Organismal Systems	Environmental adaptation	04626 Plant-pathogen interaction
Cluster_96703	K02183	Organismal Systems	Environmental adaptation	04626 Plant-pathogen interaction
Cluster_9676	"K13415,K13420,K13416"	Organismal Systems	Environmental adaptation	04626 Plant-pathogen interaction
Cluster_96772	"K01183,K13436"	Organismal Systems	Environmental adaptation	04626 Plant-pathogen interaction
Cluster_969	"K07374,K17982,K03283,K01623,K12619,K01209,K01876,K02350,K04564,K05290,K01006,K14400,K03136,K05658,K07198,K13420,K13428,K04077,K12882,K01456,K00559"	Organismal Systems	Environmental adaptation	04626 Plant-pathogen interaction
Cluster_97194	K13447	Organismal Systems	Environmental adaptation	04626 Plant-pathogen interaction
Cluster_97204	"K13436,K13430"	Organismal Systems	Environmental adaptation	04626 Plant-pathogen interaction
Cluster_9722	K13424	Organismal Systems	Environmental adaptation	04626 Plant-pathogen interaction
Cluster_9726	"K03283,K13416,K01183,K13430"	Organismal Systems	Environmental adaptation	04626 Plant-pathogen interaction
Cluster_97323	K13412	Organismal Systems	Environmental adaptation	04626 Plant-pathogen interaction
Cluster_9741	"K02183,K14309,K05349,K16226,K08852,K03283,K13414,K01115"	Organismal Systems	Environmental adaptation	04626 Plant-pathogen interaction
Cluster_97445	"K07375,K13430"	Organismal Systems	Environmental adaptation	04626 Plant-pathogen interaction
Cluster_9745	"K06236,K13434,K19720"	Organismal Systems	Environmental adaptation	04626 Plant-pathogen interaction
Cluster_9755	"K01183,K13430"	Organismal Systems	Environmental adaptation	04626 Plant-pathogen interaction
Cluster_9762	K13430	Organismal Systems	Environmental adaptation	04626 Plant-pathogen interaction
Cluster_9775	"K13415,K13428,K13420,K02984"	Organismal Systems	Environmental adaptation	04626 Plant-pathogen interaction
Cluster_9791	"K04382,K13416,K05349,K01183"	Organismal Systems	Environmental adaptation	04626 Plant-pathogen interaction
Cluster_9797	"K13417,K13416"	Organismal Systems	Environmental adaptation	04626 Plant-pathogen interaction
Cluster_9800	K13457	Organismal Systems	Environmental adaptation	04626 Plant-pathogen interaction
Cluster_98123	K13420	Organismal Systems	Environmental adaptation	04626 Plant-pathogen interaction
Cluster_9842	"K13424,K18835,K18834"	Organismal Systems	Environmental adaptation	04626 Plant-pathogen interaction
Cluster_9851	"K13420,K13415"	Organismal Systems	Environmental adaptation	04626 Plant-pathogen interaction
Cluster_9865	K18875	Organismal Systems	Environmental adaptation	04626 Plant-pathogen interaction
Cluster_9875	"K02984,K13420,K13428,K13415"	Organismal Systems	Environmental adaptation	04626 Plant-pathogen interaction
Cluster_98816	"K13436,K13416,K13415,K13430"	Organismal Systems	Environmental adaptation	04626 Plant-pathogen interaction
Cluster_99294	K13412	Organismal Systems	Environmental adaptation	04626 Plant-pathogen interaction
Cluster_99351	K02183	Organismal Systems	Environmental adaptation	04626 Plant-pathogen interaction
Cluster_99551	K13412	Organismal Systems	Environmental adaptation	04626 Plant-pathogen interaction
Cluster_996	K13412	Organismal Systems	Environmental adaptation	04626 Plant-pathogen interaction
Cluster_9962	"K13126,K13459"	Organismal Systems	Environmental adaptation	04626 Plant-pathogen interaction
Cluster_9999	K13430	Organismal Systems	Environmental adaptation	04626 Plant-pathogen interaction
Cluster_99991	"K13430,K18873"	Organismal Systems	Environmental adaptation	04626 Plant-pathogen interaction
Cluster_10003	"K12862,K01578"	Cellular Processes	Transport and catabolism	04146 Peroxisome
Cluster_10049	K01897	Cellular Processes	Transport and catabolism	04146 Peroxisome
Cluster_10239	"K11517,K13344"	Cellular Processes	Transport and catabolism	04146 Peroxisome
Cluster_10299	K03781	Cellular Processes	Transport and catabolism	04146 Peroxisome
Cluster_10325	"K13354,K14406"	Cellular Processes	Transport and catabolism	04146 Peroxisome
Cluster_10350	K13343	Cellular Processes	Transport and catabolism	04146 Peroxisome
Cluster_105123	K00232	Cellular Processes	Transport and catabolism	04146 Peroxisome
Cluster_10513	K13354	Cellular Processes	Transport and catabolism	04146 Peroxisome
Cluster_10520	"K13354,K00133"	Cellular Processes	Transport and catabolism	04146 Peroxisome
Cluster_1058	"K00232,K01188,K04392,K14760,K17982,K01876,K05356,K05658,K03136,K14416,K13420,K00430,K13428,K00559,K03644,K12882"	Cellular Processes	Transport and catabolism	04146 Peroxisome
Cluster_106706	K00232	Cellular Processes	Transport and catabolism	04146 Peroxisome
Cluster_10784	"K12261,K01904,K10526"	Cellular Processes	Transport and catabolism	04146 Peroxisome
Cluster_107945	K11517	Cellular Processes	Transport and catabolism	04146 Peroxisome
Cluster_108143	K03781	Cellular Processes	Transport and catabolism	04146 Peroxisome
Cluster_10882	K00232	Cellular Processes	Transport and catabolism	04146 Peroxisome
Cluster_108953	K00106	Cellular Processes	Transport and catabolism	04146 Peroxisome
Cluster_10931	K13348	Cellular Processes	Transport and catabolism	04146 Peroxisome
Cluster_110530	K00031	Cellular Processes	Transport and catabolism	04146 Peroxisome
Cluster_11084	K00232	Cellular Processes	Transport and catabolism	04146 Peroxisome
Cluster_113457	K00232	Cellular Processes	Transport and catabolism	04146 Peroxisome
Cluster_11516	K08726	Cellular Processes	Transport and catabolism	04146 Peroxisome
Cluster_117110	K13341	Cellular Processes	Transport and catabolism	04146 Peroxisome
Cluster_11800	K00477	Cellular Processes	Transport and catabolism	04146 Peroxisome
Cluster_11837	K03781	Cellular Processes	Transport and catabolism	04146 Peroxisome
Cluster_120176	K13344	Cellular Processes	Transport and catabolism	04146 Peroxisome
Cluster_124	"K05756,K00566,K01738,K12819,K13356,K13457,K05666,K16196,K05605,K01191,K15086"	Cellular Processes	Transport and catabolism	04146 Peroxisome
Cluster_12505	K13354	Cellular Processes	Transport and catabolism	04146 Peroxisome
Cluster_12506	K11517	Cellular Processes	Transport and catabolism	04146 Peroxisome
Cluster_1256	K01897	Cellular Processes	Transport and catabolism	04146 Peroxisome
Cluster_12811	K13341	Cellular Processes	Transport and catabolism	04146 Peroxisome
Cluster_12873	"K03426,K02350,K14651"	Cellular Processes	Transport and catabolism	04146 Peroxisome
Cluster_12894	K13346	Cellular Processes	Transport and catabolism	04146 Peroxisome
Cluster_13010	"K15542,K14004,K13341,K12662"	Cellular Processes	Transport and catabolism	04146 Peroxisome
Cluster_133	"K00830,K08081,K07466,K12616"	Cellular Processes	Transport and catabolism	04146 Peroxisome
Cluster_1365	"K01835,K13506,K13341"	Cellular Processes	Transport and catabolism	04146 Peroxisome
Cluster_13961	"K14406,K05857,K15397,K13354"	Cellular Processes	Transport and catabolism	04146 Peroxisome
Cluster_14231	"K13341,K14005,K15542"	Cellular Processes	Transport and catabolism	04146 Peroxisome
Cluster_14313	K00830	Cellular Processes	Transport and catabolism	04146 Peroxisome
Cluster_14421	"K13354,K05857,K14406"	Cellular Processes	Transport and catabolism	04146 Peroxisome
Cluster_14521	"K14406,K05857,K13354"	Cellular Processes	Transport and catabolism	04146 Peroxisome
Cluster_14844	"K13354,K05857"	Cellular Processes	Transport and catabolism	04146 Peroxisome
Cluster_14944	K13346	Cellular Processes	Transport and catabolism	04146 Peroxisome
Cluster_14968	"K13354,K14406"	Cellular Processes	Transport and catabolism	04146 Peroxisome
Cluster_14999	K13354	Cellular Processes	Transport and catabolism	04146 Peroxisome
Cluster_15100	"K01191,K15086,K13356,K13457,K10599,K05666,K12819,K12153,K14513"	Cellular Processes	Transport and catabolism	04146 Peroxisome
Cluster_15260	K11517	Cellular Processes	Transport and catabolism	04146 Peroxisome
Cluster_15401	"K05677,K15628,K05674,K05658,K05676"	Cellular Processes	Transport and catabolism	04146 Peroxisome
Cluster_1553	"K10143,K13341,K01835,K13506"	Cellular Processes	Transport and catabolism	04146 Peroxisome
Cluster_15688	K13354	Cellular Processes	Transport and catabolism	04146 Peroxisome
Cluster_15834	K13343	Cellular Processes	Transport and catabolism	04146 Peroxisome
Cluster_16250	K03426	Cellular Processes	Transport and catabolism	04146 Peroxisome
Cluster_16803	"K13341,K03130,K12857,K15542"	Cellular Processes	Transport and catabolism	04146 Peroxisome
Cluster_16805	"K13354,K00133"	Cellular Processes	Transport and catabolism	04146 Peroxisome
Cluster_17019	K11517	Cellular Processes	Transport and catabolism	04146 Peroxisome
Cluster_17050	K08726	Cellular Processes	Transport and catabolism	04146 Peroxisome
Cluster_1707	"K12493,K13356,K01689,K12847,K11839"	Cellular Processes	Transport and catabolism	04146 Peroxisome
Cluster_17125	K01897	Cellular Processes	Transport and catabolism	04146 Peroxisome
Cluster_17462	"K13356,K01652,K15086,K09833,K14513"	Cellular Processes	Transport and catabolism	04146 Peroxisome
Cluster_17466	"K05857,K13354"	Cellular Processes	Transport and catabolism	04146 Peroxisome
Cluster_17728	K00306	Cellular Processes	Transport and catabolism	04146 Peroxisome
Cluster_17910	"K14406,K05857,K13354"	Cellular Processes	Transport and catabolism	04146 Peroxisome
Cluster_18054	K00031	Cellular Processes	Transport and catabolism	04146 Peroxisome
Cluster_18337	K00232	Cellular Processes	Transport and catabolism	04146 Peroxisome
Cluster_18720	"K14005,K01895,K13341,K10143"	Cellular Processes	Transport and catabolism	04146 Peroxisome
Cluster_19095	K11147	Cellular Processes	Transport and catabolism	04146 Peroxisome
Cluster_19428	K04565	Cellular Processes	Transport and catabolism	04146 Peroxisome
Cluster_19483	K13352	Cellular Processes	Transport and catabolism	04146 Peroxisome
Cluster_19825	"K13354,K05857"	Cellular Processes	Transport and catabolism	04146 Peroxisome
Cluster_19956	K13337	Cellular Processes	Transport and catabolism	04146 Peroxisome
Cluster_19986	K13352	Cellular Processes	Transport and catabolism	04146 Peroxisome
Cluster_20461	"K12663,K10527,K07511,K05607"	Cellular Processes	Transport and catabolism	04146 Peroxisome
Cluster_20502	K13335	Cellular Processes	Transport and catabolism	04146 Peroxisome
Cluster_20873	K03426	Cellular Processes	Transport and catabolism	04146 Peroxisome
Cluster_21	"K15086,K05605,K01191,K16196,K05666,K10599,K13457,K01689,K13356,K12819,K01738,K03062,K14513,K05756,K00566"	Cellular Processes	Transport and catabolism	04146 Peroxisome
Cluster_21038	"K14406,K15397,K13354"	Cellular Processes	Transport and catabolism	04146 Peroxisome
Cluster_2119	"K03130,K13341,K15542,K12857"	Cellular Processes	Transport and catabolism	04146 Peroxisome
Cluster_21438	K13337	Cellular Processes	Transport and catabolism	04146 Peroxisome
Cluster_21478	K03426	Cellular Processes	Transport and catabolism	04146 Peroxisome
Cluster_21493	K13337	Cellular Processes	Transport and catabolism	04146 Peroxisome
Cluster_21838	K13352	Cellular Processes	Transport and catabolism	04146 Peroxisome
Cluster_22	"K05756,K00566,K12819,K01738,K05666,K10599,K13356,K13457,K15086,K05605,K01191,K16196"	Cellular Processes	Transport and catabolism	04146 Peroxisome
Cluster_22398	K11147	Cellular Processes	Transport and catabolism	04146 Peroxisome
Cluster_22434	K13352	Cellular Processes	Transport and catabolism	04146 Peroxisome
Cluster_22703	K13343	Cellular Processes	Transport and catabolism	04146 Peroxisome
Cluster_2297	K04564	Cellular Processes	Transport and catabolism	04146 Peroxisome
Cluster_23206	"K14513,K09833,K12819,K13457,K13356,K15086"	Cellular Processes	Transport and catabolism	04146 Peroxisome
Cluster_24249	K01578	Cellular Processes	Transport and catabolism	04146 Peroxisome
Cluster_2441	"K16196,K13356"	Cellular Processes	Transport and catabolism	04146 Peroxisome
Cluster_24893	K13354	Cellular Processes	Transport and catabolism	04146 Peroxisome
Cluster_25031	K03781	Cellular Processes	Transport and catabolism	04146 Peroxisome
Cluster_25114	K13336	Cellular Processes	Transport and catabolism	04146 Peroxisome
Cluster_25342	"K11147,K02934,K13237"	Cellular Processes	Transport and catabolism	04146 Peroxisome
Cluster_25618	"K15542,K13341"	Cellular Processes	Transport and catabolism	04146 Peroxisome
Cluster_25690	K13352	Cellular Processes	Transport and catabolism	04146 Peroxisome
Cluster_25734	K13348	Cellular Processes	Transport and catabolism	04146 Peroxisome
Cluster_2613	K13348	Cellular Processes	Transport and catabolism	04146 Peroxisome
Cluster_26231	K04565	Cellular Processes	Transport and catabolism	04146 Peroxisome
Cluster_26324	K04565	Cellular Processes	Transport and catabolism	04146 Peroxisome
Cluster_26429	K13335	Cellular Processes	Transport and catabolism	04146 Peroxisome
Cluster_26465	K04564	Cellular Processes	Transport and catabolism	04146 Peroxisome
Cluster_2665	"K00850,K12819,K09754,K12153,K05658,K01191,K18819,K02516,K03469,K13356,K13457,K01051,K10599"	Cellular Processes	Transport and catabolism	04146 Peroxisome
Cluster_2690	K00106	Cellular Processes	Transport and catabolism	04146 Peroxisome
Cluster_2719	"K13341,K16240,K14558"	Cellular Processes	Transport and catabolism	04146 Peroxisome
Cluster_27358	K13352	Cellular Processes	Transport and catabolism	04146 Peroxisome
Cluster_28111	K13344	Cellular Processes	Transport and catabolism	04146 Peroxisome
Cluster_28344	K05677	Cellular Processes	Transport and catabolism	04146 Peroxisome
Cluster_28431	K04564	Cellular Processes	Transport and catabolism	04146 Peroxisome
Cluster_2863	K01897	Cellular Processes	Transport and catabolism	04146 Peroxisome
Cluster_28811	K01897	Cellular Processes	Transport and catabolism	04146 Peroxisome
Cluster_289	"K16196,K01191,K02896,K15086,K13457,K13356,K01689,K02705,K01738,K12819,K14513"	Cellular Processes	Transport and catabolism	04146 Peroxisome
Cluster_291	K13341	Cellular Processes	Transport and catabolism	04146 Peroxisome
Cluster_29524	K11517	Cellular Processes	Transport and catabolism	04146 Peroxisome
Cluster_29633	K00106	Cellular Processes	Transport and catabolism	04146 Peroxisome
Cluster_29953	K03781	Cellular Processes	Transport and catabolism	04146 Peroxisome
Cluster_3032	K11517	Cellular Processes	Transport and catabolism	04146 Peroxisome
Cluster_30352	K04565	Cellular Processes	Transport and catabolism	04146 Peroxisome
Cluster_30443	"K11188,K13279"	Cellular Processes	Transport and catabolism	04146 Peroxisome
Cluster_31520	K13336	Cellular Processes	Transport and catabolism	04146 Peroxisome
Cluster_31583	K11187	Cellular Processes	Transport and catabolism	04146 Peroxisome
Cluster_32069	K11517	Cellular Processes	Transport and catabolism	04146 Peroxisome
Cluster_32448	K03426	Cellular Processes	Transport and catabolism	04146 Peroxisome
Cluster_32953	K13347	Cellular Processes	Transport and catabolism	04146 Peroxisome
Cluster_33053	"K13415,K13428,K13420,K11147"	Cellular Processes	Transport and catabolism	04146 Peroxisome
Cluster_3307	"K12857,K13341,K14556"	Cellular Processes	Transport and catabolism	04146 Peroxisome
Cluster_33172	"K13339,K13525,K03231,K12196"	Cellular Processes	Transport and catabolism	04146 Peroxisome
Cluster_33598	K13356	Cellular Processes	Transport and catabolism	04146 Peroxisome
Cluster_337	"K13356,K13457,K10599,K14513,K12153,K12852,K00850,K12819"	Cellular Processes	Transport and catabolism	04146 Peroxisome
Cluster_3378	K01897	Cellular Processes	Transport and catabolism	04146 Peroxisome
Cluster_34463	K03781	Cellular Processes	Transport and catabolism	04146 Peroxisome
Cluster_34471	K00031	Cellular Processes	Transport and catabolism	04146 Peroxisome
Cluster_3517	K11517	Cellular Processes	Transport and catabolism	04146 Peroxisome
Cluster_35309	K13356	Cellular Processes	Transport and catabolism	04146 Peroxisome
Cluster_35654	"K05676,K05677,K15628"	Cellular Processes	Transport and catabolism	04146 Peroxisome
Cluster_3596	"K05677,K15628,K05658,K05676,K05678"	Cellular Processes	Transport and catabolism	04146 Peroxisome
Cluster_36054	K08726	Cellular Processes	Transport and catabolism	04146 Peroxisome
Cluster_3627	"K14558,K14554,K12857,K03130,K14962,K13341"	Cellular Processes	Transport and catabolism	04146 Peroxisome
Cluster_36333	K01897	Cellular Processes	Transport and catabolism	04146 Peroxisome
Cluster_36943	K00106	Cellular Processes	Transport and catabolism	04146 Peroxisome
Cluster_3742	K13348	Cellular Processes	Transport and catabolism	04146 Peroxisome
Cluster_3765	K01897	Cellular Processes	Transport and catabolism	04146 Peroxisome
Cluster_37675	K00031	Cellular Processes	Transport and catabolism	04146 Peroxisome
Cluster_38132	K11187	Cellular Processes	Transport and catabolism	04146 Peroxisome
Cluster_38622	"K12862,K13341,K12662,K03130,K14555"	Cellular Processes	Transport and catabolism	04146 Peroxisome
Cluster_38833	"K14759,K08726"	Cellular Processes	Transport and catabolism	04146 Peroxisome
Cluster_38883	"K13279,K11188"	Cellular Processes	Transport and catabolism	04146 Peroxisome
Cluster_3895	K01897	Cellular Processes	Transport and catabolism	04146 Peroxisome
Cluster_391	"K05756,K00566,K01738,K12819,K13457,K13356,K10599,K05666,K16196,K05605,K01191,K15086"	Cellular Processes	Transport and catabolism	04146 Peroxisome
Cluster_39226	"K13525,K13338,K03231,K14571"	Cellular Processes	Transport and catabolism	04146 Peroxisome
Cluster_395	"K12819,K12153,K01191,K18819,K10599,K13457,K13356,K05666"	Cellular Processes	Transport and catabolism	04146 Peroxisome
Cluster_3963	K00232	Cellular Processes	Transport and catabolism	04146 Peroxisome
Cluster_40156	"K13279,K11188"	Cellular Processes	Transport and catabolism	04146 Peroxisome
Cluster_4030	K11517	Cellular Processes	Transport and catabolism	04146 Peroxisome
Cluster_40354	K13237	Cellular Processes	Transport and catabolism	04146 Peroxisome
Cluster_40555	K13352	Cellular Processes	Transport and catabolism	04146 Peroxisome
Cluster_40885	K03781	Cellular Processes	Transport and catabolism	04146 Peroxisome
Cluster_41	"K15086,K01191,K05605,K16196,K05666,K10599,K13457,K13356,K12819,K01738,K14513,K00566,K12153,K05756"	Cellular Processes	Transport and catabolism	04146 Peroxisome
Cluster_41096	K11187	Cellular Processes	Transport and catabolism	04146 Peroxisome
Cluster_42000	K03781	Cellular Processes	Transport and catabolism	04146 Peroxisome
Cluster_42097	K04565	Cellular Processes	Transport and catabolism	04146 Peroxisome
Cluster_42197	"K13344,K11517"	Cellular Processes	Transport and catabolism	04146 Peroxisome
Cluster_42287	K01897	Cellular Processes	Transport and catabolism	04146 Peroxisome
Cluster_4229	"K13348,K13347"	Cellular Processes	Transport and catabolism	04146 Peroxisome
Cluster_42409	K13335	Cellular Processes	Transport and catabolism	04146 Peroxisome
Cluster_42632	K13337	Cellular Processes	Transport and catabolism	04146 Peroxisome
Cluster_4287	"K12816,K14018,K10143,K12662,K13341,K12602,K15542,K12857,K03246"	Cellular Processes	Transport and catabolism	04146 Peroxisome
Cluster_44150	K03781	Cellular Processes	Transport and catabolism	04146 Peroxisome
Cluster_44365	K08726	Cellular Processes	Transport and catabolism	04146 Peroxisome
Cluster_44460	K00031	Cellular Processes	Transport and catabolism	04146 Peroxisome
Cluster_44499	K07513	Cellular Processes	Transport and catabolism	04146 Peroxisome
Cluster_44545	K03781	Cellular Processes	Transport and catabolism	04146 Peroxisome
Cluster_44579	K00232	Cellular Processes	Transport and catabolism	04146 Peroxisome
Cluster_4510	"K13354,K01183"	Cellular Processes	Transport and catabolism	04146 Peroxisome
Cluster_4528	K01897	Cellular Processes	Transport and catabolism	04146 Peroxisome
Cluster_45530	K03426	Cellular Processes	Transport and catabolism	04146 Peroxisome
Cluster_4608	K07513	Cellular Processes	Transport and catabolism	04146 Peroxisome
Cluster_46201	K01897	Cellular Processes	Transport and catabolism	04146 Peroxisome
Cluster_48344	K11187	Cellular Processes	Transport and catabolism	04146 Peroxisome
Cluster_48835	K00830	Cellular Processes	Transport and catabolism	04146 Peroxisome
Cluster_49247	K00106	Cellular Processes	Transport and catabolism	04146 Peroxisome
Cluster_4973	K13356	Cellular Processes	Transport and catabolism	04146 Peroxisome
Cluster_50944	K11517	Cellular Processes	Transport and catabolism	04146 Peroxisome
Cluster_5103	K01578	Cellular Processes	Transport and catabolism	04146 Peroxisome
Cluster_5148	K00232	Cellular Processes	Transport and catabolism	04146 Peroxisome
Cluster_5150	"K13354,K05275,K05857"	Cellular Processes	Transport and catabolism	04146 Peroxisome
Cluster_51576	K00232	Cellular Processes	Transport and catabolism	04146 Peroxisome
Cluster_51663	K03781	Cellular Processes	Transport and catabolism	04146 Peroxisome
Cluster_5196	K13354	Cellular Processes	Transport and catabolism	04146 Peroxisome
Cluster_52979	K01897	Cellular Processes	Transport and catabolism	04146 Peroxisome
Cluster_530	"K02350,K04564,K12619,K07374,K17982,K03283,K01623,K14489,K14539,K04077,K12882,K00559,K01456,K12741,K07198,K13420,K13428,K03136,K01191,K05658,K00654,K02993,K05290,K01006"	Cellular Processes	Transport and catabolism	04146 Peroxisome
Cluster_5308	"K18660,K01904,K12261"	Cellular Processes	Transport and catabolism	04146 Peroxisome
Cluster_53099	K11517	Cellular Processes	Transport and catabolism	04146 Peroxisome
Cluster_53394	K11517	Cellular Processes	Transport and catabolism	04146 Peroxisome
Cluster_53972	"K12663,K12733,K09567"	Cellular Processes	Transport and catabolism	04146 Peroxisome
Cluster_5411	K00232	Cellular Processes	Transport and catabolism	04146 Peroxisome
Cluster_54171	K13356	Cellular Processes	Transport and catabolism	04146 Peroxisome
Cluster_5457	"K01897,K04392"	Cellular Processes	Transport and catabolism	04146 Peroxisome
Cluster_5531	"K15628,K05677,K05656,K05658,K05678,K05663,K05661"	Cellular Processes	Transport and catabolism	04146 Peroxisome
Cluster_55793	K01897	Cellular Processes	Transport and catabolism	04146 Peroxisome
Cluster_55866	K04565	Cellular Processes	Transport and catabolism	04146 Peroxisome
Cluster_56265	"K13279,K11188"	Cellular Processes	Transport and catabolism	04146 Peroxisome
Cluster_565	K00106	Cellular Processes	Transport and catabolism	04146 Peroxisome
Cluster_56998	K00232	Cellular Processes	Transport and catabolism	04146 Peroxisome
Cluster_57380	K01897	Cellular Processes	Transport and catabolism	04146 Peroxisome
Cluster_58150	K13341	Cellular Processes	Transport and catabolism	04146 Peroxisome
Cluster_58173	K13354	Cellular Processes	Transport and catabolism	04146 Peroxisome
Cluster_58822	K13344	Cellular Processes	Transport and catabolism	04146 Peroxisome
Cluster_60415	K03781	Cellular Processes	Transport and catabolism	04146 Peroxisome
Cluster_60810	K13354	Cellular Processes	Transport and catabolism	04146 Peroxisome
Cluster_61386	K03781	Cellular Processes	Transport and catabolism	04146 Peroxisome
Cluster_6210	"K13344,K11517"	Cellular Processes	Transport and catabolism	04146 Peroxisome
Cluster_62434	K03781	Cellular Processes	Transport and catabolism	04146 Peroxisome
Cluster_6517	K01897	Cellular Processes	Transport and catabolism	04146 Peroxisome
Cluster_65583	K01897	Cellular Processes	Transport and catabolism	04146 Peroxisome
Cluster_65614	K03426	Cellular Processes	Transport and catabolism	04146 Peroxisome
Cluster_6595	"K13412,K05857,K13354"	Cellular Processes	Transport and catabolism	04146 Peroxisome
Cluster_6679	K11517	Cellular Processes	Transport and catabolism	04146 Peroxisome
Cluster_66999	K01897	Cellular Processes	Transport and catabolism	04146 Peroxisome
Cluster_67169	K13354	Cellular Processes	Transport and catabolism	04146 Peroxisome
Cluster_67286	K00830	Cellular Processes	Transport and catabolism	04146 Peroxisome
Cluster_67610	K07513	Cellular Processes	Transport and catabolism	04146 Peroxisome
Cluster_67663	K01897	Cellular Processes	Transport and catabolism	04146 Peroxisome
Cluster_6876	K12261	Cellular Processes	Transport and catabolism	04146 Peroxisome
Cluster_69212	K11517	Cellular Processes	Transport and catabolism	04146 Peroxisome
Cluster_69368	K13354	Cellular Processes	Transport and catabolism	04146 Peroxisome
Cluster_70	K06664	Cellular Processes	Transport and catabolism	04146 Peroxisome
Cluster_7046	K12261	Cellular Processes	Transport and catabolism	04146 Peroxisome
Cluster_7053	"K12795,K03283,K13342,K09561"	Cellular Processes	Transport and catabolism	04146 Peroxisome
Cluster_711	"K13338,K14575"	Cellular Processes	Transport and catabolism	04146 Peroxisome
Cluster_71307	"K11147,K13416,K13420,K00276,K13417"	Cellular Processes	Transport and catabolism	04146 Peroxisome
Cluster_7212	K03781	Cellular Processes	Transport and catabolism	04146 Peroxisome
Cluster_728	K13342	Cellular Processes	Transport and catabolism	04146 Peroxisome
Cluster_7287	"K05857,K14406,K13354"	Cellular Processes	Transport and catabolism	04146 Peroxisome
Cluster_73016	K03426	Cellular Processes	Transport and catabolism	04146 Peroxisome
Cluster_73097	K01897	Cellular Processes	Transport and catabolism	04146 Peroxisome
Cluster_73652	K13352	Cellular Processes	Transport and catabolism	04146 Peroxisome
Cluster_7401	"K00133,K13354"	Cellular Processes	Transport and catabolism	04146 Peroxisome
Cluster_7404	"K01895,K13341"	Cellular Processes	Transport and catabolism	04146 Peroxisome
Cluster_7513	K13346	Cellular Processes	Transport and catabolism	04146 Peroxisome
Cluster_7577	K12261	Cellular Processes	Transport and catabolism	04146 Peroxisome
Cluster_7634	"K13354,K05857,K13412,K14406"	Cellular Processes	Transport and catabolism	04146 Peroxisome
Cluster_77241	K07513	Cellular Processes	Transport and catabolism	04146 Peroxisome
Cluster_7740	"K13341,K10143"	Cellular Processes	Transport and catabolism	04146 Peroxisome
Cluster_776	"K05666,K13356,K13457,K15086,K05605,K01191,K16196,K05756,K00566,K12819,K01738"	Cellular Processes	Transport and catabolism	04146 Peroxisome
Cluster_78573	K11517	Cellular Processes	Transport and catabolism	04146 Peroxisome
Cluster_7989	K07513	Cellular Processes	Transport and catabolism	04146 Peroxisome
Cluster_7999	"K10666,K13346"	Cellular Processes	Transport and catabolism	04146 Peroxisome
Cluster_8093	"K05857,K13412,K13354,K13448,K02183"	Cellular Processes	Transport and catabolism	04146 Peroxisome
Cluster_81157	K12663	Cellular Processes	Transport and catabolism	04146 Peroxisome
Cluster_82705	K11517	Cellular Processes	Transport and catabolism	04146 Peroxisome
Cluster_83268	K13341	Cellular Processes	Transport and catabolism	04146 Peroxisome
Cluster_8348	K01578	Cellular Processes	Transport and catabolism	04146 Peroxisome
Cluster_84125	K00031	Cellular Processes	Transport and catabolism	04146 Peroxisome
Cluster_84128	K01897	Cellular Processes	Transport and catabolism	04146 Peroxisome
Cluster_8423	K13356	Cellular Processes	Transport and catabolism	04146 Peroxisome
Cluster_85178	K03781	Cellular Processes	Transport and catabolism	04146 Peroxisome
Cluster_85243	K03781	Cellular Processes	Transport and catabolism	04146 Peroxisome
Cluster_86198	K00106	Cellular Processes	Transport and catabolism	04146 Peroxisome
Cluster_8624	K13346	Cellular Processes	Transport and catabolism	04146 Peroxisome
Cluster_86392	K04564	Cellular Processes	Transport and catabolism	04146 Peroxisome
Cluster_86719	K01897	Cellular Processes	Transport and catabolism	04146 Peroxisome
Cluster_8749	"K14571,K03064,K03065,K03066,K13339,K13525"	Cellular Processes	Transport and catabolism	04146 Peroxisome
Cluster_8867	K01897	Cellular Processes	Transport and catabolism	04146 Peroxisome
Cluster_8956	"K02183,K13448,K13354,K05857,K13412"	Cellular Processes	Transport and catabolism	04146 Peroxisome
Cluster_9036	K00031	Cellular Processes	Transport and catabolism	04146 Peroxisome
Cluster_91169	K13343	Cellular Processes	Transport and catabolism	04146 Peroxisome
Cluster_9125	"K13341,K10143"	Cellular Processes	Transport and catabolism	04146 Peroxisome
Cluster_91456	"K05677,K05676"	Cellular Processes	Transport and catabolism	04146 Peroxisome
Cluster_9152	K01640	Cellular Processes	Transport and catabolism	04146 Peroxisome
Cluster_91588	K03426	Cellular Processes	Transport and catabolism	04146 Peroxisome
Cluster_92476	K03781	Cellular Processes	Transport and catabolism	04146 Peroxisome
Cluster_9382	"K15542,K10260,K16240,K12857,K14005,K10143,K13341"	Cellular Processes	Transport and catabolism	04146 Peroxisome
Cluster_9628	"K15542,K10260,K16240,K12857,K14005,K10143,K13341"	Cellular Processes	Transport and catabolism	04146 Peroxisome
Cluster_96451	K03781	Cellular Processes	Transport and catabolism	04146 Peroxisome
Cluster_969	"K07374,K17982,K03283,K01623,K12619,K01209,K01876,K02350,K04564,K05290,K01006,K14400,K03136,K05658,K07198,K13420,K13428,K04077,K12882,K01456,K00559"	Cellular Processes	Transport and catabolism	04146 Peroxisome
Cluster_9712	"K14004,K12602,K13341,K03130,K03364"	Cellular Processes	Transport and catabolism	04146 Peroxisome
Cluster_97744	K04565	Cellular Processes	Transport and catabolism	04146 Peroxisome
Cluster_9828	"K03070,K12816,K14018,K12602,K12862,K01578,K10260,K14555,K03246"	Cellular Processes	Transport and catabolism	04146 Peroxisome
Cluster_98942	K00031	Cellular Processes	Transport and catabolism	04146 Peroxisome
Cluster_99210	K00232	Cellular Processes	Transport and catabolism	04146 Peroxisome
Cluster_99648	K01897	Cellular Processes	Transport and catabolism	04146 Peroxisome
Cluster_999	K13356	Cellular Processes	Transport and catabolism	04146 Peroxisome
Cluster_100002	K02151	Cellular Processes	Transport and catabolism	04145 Phagosome
Cluster_100856	K07375	Cellular Processes	Transport and catabolism	04145 Phagosome
Cluster_101377	K02150	Cellular Processes	Transport and catabolism	04145 Phagosome
Cluster_101557	K02147	Cellular Processes	Transport and catabolism	04145 Phagosome
Cluster_10311	K08488	Cellular Processes	Transport and catabolism	04145 Phagosome
Cluster_103270	K07375	Cellular Processes	Transport and catabolism	04145 Phagosome
Cluster_10392	K05692	Cellular Processes	Transport and catabolism	04145 Phagosome
Cluster_10428	"K01373,K01365"	Cellular Processes	Transport and catabolism	04145 Phagosome
Cluster_1058	"K00232,K01188,K04392,K14760,K17982,K01876,K05356,K05658,K03136,K14416,K13420,K00430,K13428,K00559,K03644,K12882"	Cellular Processes	Transport and catabolism	04145 Phagosome
Cluster_106157	K02146	Cellular Processes	Transport and catabolism	04145 Phagosome
Cluster_107378	K02155	Cellular Processes	Transport and catabolism	04145 Phagosome
Cluster_107514	K07375	Cellular Processes	Transport and catabolism	04145 Phagosome
Cluster_108947	K07374	Cellular Processes	Transport and catabolism	04145 Phagosome
Cluster_109106	K05692	Cellular Processes	Transport and catabolism	04145 Phagosome
Cluster_109318	K07374	Cellular Processes	Transport and catabolism	04145 Phagosome
Cluster_109491	K07374	Cellular Processes	Transport and catabolism	04145 Phagosome
Cluster_110436	K10956	Cellular Processes	Transport and catabolism	04145 Phagosome
Cluster_11045	K07374	Cellular Processes	Transport and catabolism	04145 Phagosome
Cluster_111494	K02152	Cellular Processes	Transport and catabolism	04145 Phagosome
Cluster_11151	K07374	Cellular Processes	Transport and catabolism	04145 Phagosome
Cluster_11167	K07375	Cellular Processes	Transport and catabolism	04145 Phagosome
Cluster_112	K00921	Cellular Processes	Transport and catabolism	04145 Phagosome
Cluster_112870	K02150	Cellular Processes	Transport and catabolism	04145 Phagosome
Cluster_113917	K08488	Cellular Processes	Transport and catabolism	04145 Phagosome
Cluster_116587	K07375	Cellular Processes	Transport and catabolism	04145 Phagosome
Cluster_1172	"K04077,K03644,K12882,K13420,K12741,K07198,K05658,K00654,K01191,K02350,K00799,K00627,K01209,K01876,K12619,K01623,K01188,K14760,K04392,K07374"	Cellular Processes	Transport and catabolism	04145 Phagosome
Cluster_118098	K02152	Cellular Processes	Transport and catabolism	04145 Phagosome
Cluster_11812	K02145	Cellular Processes	Transport and catabolism	04145 Phagosome
Cluster_11841	K05692	Cellular Processes	Transport and catabolism	04145 Phagosome
Cluster_118616	K05692	Cellular Processes	Transport and catabolism	04145 Phagosome
Cluster_119382	K07897	Cellular Processes	Transport and catabolism	04145 Phagosome
Cluster_1203	K00921	Cellular Processes	Transport and catabolism	04145 Phagosome
Cluster_1226	"K13466,K02146,K13420,K13428,K13415"	Cellular Processes	Transport and catabolism	04145 Phagosome
Cluster_12339	K07374	Cellular Processes	Transport and catabolism	04145 Phagosome
Cluster_12350	K01365	Cellular Processes	Transport and catabolism	04145 Phagosome
Cluster_1244	"K02350,K00627,K12619,K07374,K14760,K03283,K01623,K04077,K14539,K12882,K01456,K12741,K07198,K13420,K13428,K01191,K05658,K00654,K05356"	Cellular Processes	Transport and catabolism	04145 Phagosome
Cluster_1248	K00921	Cellular Processes	Transport and catabolism	04145 Phagosome
Cluster_12636	K07374	Cellular Processes	Transport and catabolism	04145 Phagosome
Cluster_12742	K08057	Cellular Processes	Transport and catabolism	04145 Phagosome
Cluster_13107	K07374	Cellular Processes	Transport and catabolism	04145 Phagosome
Cluster_13332	K04392	Cellular Processes	Transport and catabolism	04145 Phagosome
Cluster_1341	K05692	Cellular Processes	Transport and catabolism	04145 Phagosome
Cluster_1346	K00914	Cellular Processes	Transport and catabolism	04145 Phagosome
Cluster_135	"K00654,K05658,K01191,K05356,K01456,K00559,K12882,K14539,K04077,K13428,K13420,K07198,K12741,K12619,K01623,K03283,K14760,K07374,K02350,K00627"	Cellular Processes	Transport and catabolism	04145 Phagosome
Cluster_13796	K02149	Cellular Processes	Transport and catabolism	04145 Phagosome
Cluster_13834	K08492	Cellular Processes	Transport and catabolism	04145 Phagosome
Cluster_1395	K07374	Cellular Processes	Transport and catabolism	04145 Phagosome
Cluster_14328	"K01373,K01365"	Cellular Processes	Transport and catabolism	04145 Phagosome
Cluster_14348	K02146	Cellular Processes	Transport and catabolism	04145 Phagosome
Cluster_14416	K02148	Cellular Processes	Transport and catabolism	04145 Phagosome
Cluster_14436	"K01365,K01373"	Cellular Processes	Transport and catabolism	04145 Phagosome
Cluster_1472	"K05356,K05658,K01191,K03136,K13420,K07198,K12741,K01456,K12882,K03644,K04077,K01623,K17982,K04392,K14760,K07374,K01188,K12619,K00627,K01876,K02350"	Cellular Processes	Transport and catabolism	04145 Phagosome
Cluster_148	K00921	Cellular Processes	Transport and catabolism	04145 Phagosome
Cluster_1488	K02147	Cellular Processes	Transport and catabolism	04145 Phagosome
Cluster_14924	K04392	Cellular Processes	Transport and catabolism	04145 Phagosome
Cluster_1500	K05692	Cellular Processes	Transport and catabolism	04145 Phagosome
Cluster_15381	K07374	Cellular Processes	Transport and catabolism	04145 Phagosome
Cluster_1552	K01365	Cellular Processes	Transport and catabolism	04145 Phagosome
Cluster_15700	K00921	Cellular Processes	Transport and catabolism	04145 Phagosome
Cluster_15716	K01365	Cellular Processes	Transport and catabolism	04145 Phagosome
Cluster_15995	K05692	Cellular Processes	Transport and catabolism	04145 Phagosome
Cluster_16476	"K07889,K07887"	Cellular Processes	Transport and catabolism	04145 Phagosome
Cluster_16492	K08488	Cellular Processes	Transport and catabolism	04145 Phagosome
Cluster_16526	K07374	Cellular Processes	Transport and catabolism	04145 Phagosome
Cluster_16978	"K01365,K01373"	Cellular Processes	Transport and catabolism	04145 Phagosome
Cluster_17226	K07897	Cellular Processes	Transport and catabolism	04145 Phagosome
Cluster_17409	K05692	Cellular Processes	Transport and catabolism	04145 Phagosome
Cluster_18051	K07374	Cellular Processes	Transport and catabolism	04145 Phagosome
Cluster_18256	K01365	Cellular Processes	Transport and catabolism	04145 Phagosome
Cluster_1830	"K01868,K00799,K01876,K12619,K01623,K03575,K01188,K07374,K04392,K14760,K17982,K00559,K03644,K14489,K12882,K13420,K05658,K03136,K01191,K01006,K05356"	Cellular Processes	Transport and catabolism	04145 Phagosome
Cluster_18338	K08488	Cellular Processes	Transport and catabolism	04145 Phagosome
Cluster_18394	K01365	Cellular Processes	Transport and catabolism	04145 Phagosome
Cluster_18613	K01365	Cellular Processes	Transport and catabolism	04145 Phagosome
Cluster_1878	K07374	Cellular Processes	Transport and catabolism	04145 Phagosome
Cluster_18789	K07374	Cellular Processes	Transport and catabolism	04145 Phagosome
Cluster_19282	K08054	Cellular Processes	Transport and catabolism	04145 Phagosome
Cluster_19393	K07375	Cellular Processes	Transport and catabolism	04145 Phagosome
Cluster_19827	K10956	Cellular Processes	Transport and catabolism	04145 Phagosome
Cluster_19896	K08517	Cellular Processes	Transport and catabolism	04145 Phagosome
Cluster_20027	"K13420,K02146,K13415"	Cellular Processes	Transport and catabolism	04145 Phagosome
Cluster_20123	"K07889,K07887,K07904"	Cellular Processes	Transport and catabolism	04145 Phagosome
Cluster_20291	K01365	Cellular Processes	Transport and catabolism	04145 Phagosome
Cluster_20314	K01365	Cellular Processes	Transport and catabolism	04145 Phagosome
Cluster_20500	K01365	Cellular Processes	Transport and catabolism	04145 Phagosome
Cluster_20567	K07375	Cellular Processes	Transport and catabolism	04145 Phagosome
Cluster_20613	K07374	Cellular Processes	Transport and catabolism	04145 Phagosome
Cluster_20893	"K13420,K02146,K13466,K13415"	Cellular Processes	Transport and catabolism	04145 Phagosome
Cluster_21324	"K02146,K13420,K13415"	Cellular Processes	Transport and catabolism	04145 Phagosome
Cluster_21717	K08488	Cellular Processes	Transport and catabolism	04145 Phagosome
Cluster_22053	K07897	Cellular Processes	Transport and catabolism	04145 Phagosome
Cluster_22224	K02154	Cellular Processes	Transport and catabolism	04145 Phagosome
Cluster_22846	K08517	Cellular Processes	Transport and catabolism	04145 Phagosome
Cluster_22847	K04392	Cellular Processes	Transport and catabolism	04145 Phagosome
Cluster_23105	K05692	Cellular Processes	Transport and catabolism	04145 Phagosome
Cluster_23256	"K13415,K13420,K13428,K02146,K13416"	Cellular Processes	Transport and catabolism	04145 Phagosome
Cluster_23469	"K07887,K07889"	Cellular Processes	Transport and catabolism	04145 Phagosome
Cluster_23623	"K01183,K13430,K07375"	Cellular Processes	Transport and catabolism	04145 Phagosome
Cluster_23836	K02147	Cellular Processes	Transport and catabolism	04145 Phagosome
Cluster_24009	K02154	Cellular Processes	Transport and catabolism	04145 Phagosome
Cluster_24210	K02149	Cellular Processes	Transport and catabolism	04145 Phagosome
Cluster_2426	K04392	Cellular Processes	Transport and catabolism	04145 Phagosome
Cluster_24534	K04392	Cellular Processes	Transport and catabolism	04145 Phagosome
Cluster_25152	K07889	Cellular Processes	Transport and catabolism	04145 Phagosome
Cluster_25879	K07374	Cellular Processes	Transport and catabolism	04145 Phagosome
Cluster_25951	K04392	Cellular Processes	Transport and catabolism	04145 Phagosome
Cluster_26096	K08057	Cellular Processes	Transport and catabolism	04145 Phagosome
Cluster_26802	K07889	Cellular Processes	Transport and catabolism	04145 Phagosome
Cluster_27534	K07374	Cellular Processes	Transport and catabolism	04145 Phagosome
Cluster_27725	K05692	Cellular Processes	Transport and catabolism	04145 Phagosome
Cluster_28152	K07374	Cellular Processes	Transport and catabolism	04145 Phagosome
Cluster_28176	K03661	Cellular Processes	Transport and catabolism	04145 Phagosome
Cluster_28470	K04392	Cellular Processes	Transport and catabolism	04145 Phagosome
Cluster_28569	K07889	Cellular Processes	Transport and catabolism	04145 Phagosome
Cluster_28630	K07374	Cellular Processes	Transport and catabolism	04145 Phagosome
Cluster_28783	K08057	Cellular Processes	Transport and catabolism	04145 Phagosome
Cluster_2885	K02154	Cellular Processes	Transport and catabolism	04145 Phagosome
Cluster_28979	K07374	Cellular Processes	Transport and catabolism	04145 Phagosome
Cluster_29119	"K01365,K01373"	Cellular Processes	Transport and catabolism	04145 Phagosome
Cluster_29149	K07342	Cellular Processes	Transport and catabolism	04145 Phagosome
Cluster_29189	K05692	Cellular Processes	Transport and catabolism	04145 Phagosome
Cluster_29363	K02145	Cellular Processes	Transport and catabolism	04145 Phagosome
Cluster_29471	"K01373,K01365"	Cellular Processes	Transport and catabolism	04145 Phagosome
Cluster_297	K08057	Cellular Processes	Transport and catabolism	04145 Phagosome
Cluster_29819	K02150	Cellular Processes	Transport and catabolism	04145 Phagosome
Cluster_301	"K00799,K02350,K01876,K00627,K12619,K07374,K14760,K01188,K03283,K01623,K12882,K04077,K03644,K14539,K07198,K13420,K01191,K05658"	Cellular Processes	Transport and catabolism	04145 Phagosome
Cluster_30254	K02155	Cellular Processes	Transport and catabolism	04145 Phagosome
Cluster_30402	K02155	Cellular Processes	Transport and catabolism	04145 Phagosome
Cluster_30481	K02150	Cellular Processes	Transport and catabolism	04145 Phagosome
Cluster_30520	K08517	Cellular Processes	Transport and catabolism	04145 Phagosome
Cluster_311	"K01456,K04077,K14539,K12882,K13420,K13428,K12741,K07198,K05658,K02350,K00627,K01738,K12619,K03283,K01623,K07374,K04392"	Cellular Processes	Transport and catabolism	04145 Phagosome
Cluster_31215	K04392	Cellular Processes	Transport and catabolism	04145 Phagosome
Cluster_31364	K08057	Cellular Processes	Transport and catabolism	04145 Phagosome
Cluster_31852	K02152	Cellular Processes	Transport and catabolism	04145 Phagosome
Cluster_3190	K05692	Cellular Processes	Transport and catabolism	04145 Phagosome
Cluster_321	"K01886,K05658,K00654,K01191,K13420,K13428,K12741,K07198,K01456,K04077,K03644,K14539,K12882,K01623,K01188,K04392,K07374,K14760,K12619,K01876,K02350,K00799"	Cellular Processes	Transport and catabolism	04145 Phagosome
Cluster_323	"K14760,K07374,K17982,K03283,K01623,K02328,K01876,K03136,K05658,K05356,K05290,K01006,K12882,K00559,K13420"	Cellular Processes	Transport and catabolism	04145 Phagosome
Cluster_32390	K07374	Cellular Processes	Transport and catabolism	04145 Phagosome
Cluster_32595	K02153	Cellular Processes	Transport and catabolism	04145 Phagosome
Cluster_32618	K02147	Cellular Processes	Transport and catabolism	04145 Phagosome
Cluster_32687	K02154	Cellular Processes	Transport and catabolism	04145 Phagosome
Cluster_32830	K02155	Cellular Processes	Transport and catabolism	04145 Phagosome
Cluster_33695	K01365	Cellular Processes	Transport and catabolism	04145 Phagosome
Cluster_33842	K10956	Cellular Processes	Transport and catabolism	04145 Phagosome
Cluster_3460	"K01365,K09680"	Cellular Processes	Transport and catabolism	04145 Phagosome
Cluster_34959	K01365	Cellular Processes	Transport and catabolism	04145 Phagosome
Cluster_35221	K08488	Cellular Processes	Transport and catabolism	04145 Phagosome
Cluster_35232	K02148	Cellular Processes	Transport and catabolism	04145 Phagosome
Cluster_35386	K05692	Cellular Processes	Transport and catabolism	04145 Phagosome
Cluster_35969	K02155	Cellular Processes	Transport and catabolism	04145 Phagosome
Cluster_36	"K07374,K12619,K02350,K05658,K13420,K00430,K07198,K12741,K14457,K01456,K14539,K01051"	Cellular Processes	Transport and catabolism	04145 Phagosome
Cluster_36098	K05692	Cellular Processes	Transport and catabolism	04145 Phagosome
Cluster_36240	K07375	Cellular Processes	Transport and catabolism	04145 Phagosome
Cluster_36483	"K13415,K13420,K02146"	Cellular Processes	Transport and catabolism	04145 Phagosome
Cluster_37384	K07897	Cellular Processes	Transport and catabolism	04145 Phagosome
Cluster_37569	K05692	Cellular Processes	Transport and catabolism	04145 Phagosome
Cluster_37571	K04392	Cellular Processes	Transport and catabolism	04145 Phagosome
Cluster_38180	K09481	Cellular Processes	Transport and catabolism	04145 Phagosome
Cluster_38887	K05692	Cellular Processes	Transport and catabolism	04145 Phagosome
Cluster_39171	K10956	Cellular Processes	Transport and catabolism	04145 Phagosome
Cluster_39858	K08054	Cellular Processes	Transport and catabolism	04145 Phagosome
Cluster_40464	K07375	Cellular Processes	Transport and catabolism	04145 Phagosome
Cluster_40549	K07342	Cellular Processes	Transport and catabolism	04145 Phagosome
Cluster_41057	K02153	Cellular Processes	Transport and catabolism	04145 Phagosome
Cluster_41208	K05692	Cellular Processes	Transport and catabolism	04145 Phagosome
Cluster_41380	"K07889,K07904"	Cellular Processes	Transport and catabolism	04145 Phagosome
Cluster_41420	K02152	Cellular Processes	Transport and catabolism	04145 Phagosome
Cluster_41564	K07375	Cellular Processes	Transport and catabolism	04145 Phagosome
Cluster_4200	K05692	Cellular Processes	Transport and catabolism	04145 Phagosome
Cluster_42028	"K03028,K05658,K00434,K07374,K14760,K01876"	Cellular Processes	Transport and catabolism	04145 Phagosome
Cluster_42421	K07374	Cellular Processes	Transport and catabolism	04145 Phagosome
Cluster_429	"K00559,K01456,K12882,K14539,K04077,K13428,K13420,K07198,K12741,K05658,K14416,K03136,K01006,K14400,K02350,K01876,K01209,K12619,K03283,K01623,K07374,K04392,K17982"	Cellular Processes	Transport and catabolism	04145 Phagosome
Cluster_42973	K02155	Cellular Processes	Transport and catabolism	04145 Phagosome
Cluster_43035	K10956	Cellular Processes	Transport and catabolism	04145 Phagosome
Cluster_43495	K10956	Cellular Processes	Transport and catabolism	04145 Phagosome
Cluster_43827	K02154	Cellular Processes	Transport and catabolism	04145 Phagosome
Cluster_43889	"K13415,K13420,K13428,K14301,K02146"	Cellular Processes	Transport and catabolism	04145 Phagosome
Cluster_44147	K04392	Cellular Processes	Transport and catabolism	04145 Phagosome
Cluster_44414	K07342	Cellular Processes	Transport and catabolism	04145 Phagosome
Cluster_44441	K01365	Cellular Processes	Transport and catabolism	04145 Phagosome
Cluster_44470	K07374	Cellular Processes	Transport and catabolism	04145 Phagosome
Cluster_45030	K02145	Cellular Processes	Transport and catabolism	04145 Phagosome
Cluster_45127	K02147	Cellular Processes	Transport and catabolism	04145 Phagosome
Cluster_45226	K07374	Cellular Processes	Transport and catabolism	04145 Phagosome
Cluster_45516	K07374	Cellular Processes	Transport and catabolism	04145 Phagosome
Cluster_45698	K07374	Cellular Processes	Transport and catabolism	04145 Phagosome
Cluster_46095	K07375	Cellular Processes	Transport and catabolism	04145 Phagosome
Cluster_46191	"K13415,K02146,K13420,K13416"	Cellular Processes	Transport and catabolism	04145 Phagosome
Cluster_4626	K04392	Cellular Processes	Transport and catabolism	04145 Phagosome
Cluster_46279	K05692	Cellular Processes	Transport and catabolism	04145 Phagosome
Cluster_47044	K02152	Cellular Processes	Transport and catabolism	04145 Phagosome
Cluster_47893	K07374	Cellular Processes	Transport and catabolism	04145 Phagosome
Cluster_49023	K09481	Cellular Processes	Transport and catabolism	04145 Phagosome
Cluster_49512	K04392	Cellular Processes	Transport and catabolism	04145 Phagosome
Cluster_49796	"K13415,K02146,K13428,K13420"	Cellular Processes	Transport and catabolism	04145 Phagosome
Cluster_49914	K02154	Cellular Processes	Transport and catabolism	04145 Phagosome
Cluster_5048	"K08249,K09756,K09757,K05692"	Cellular Processes	Transport and catabolism	04145 Phagosome
Cluster_50482	"K13415,K02146"	Cellular Processes	Transport and catabolism	04145 Phagosome
Cluster_50743	"K01373,K01365"	Cellular Processes	Transport and catabolism	04145 Phagosome
Cluster_5102	K01365	Cellular Processes	Transport and catabolism	04145 Phagosome
Cluster_5141	K08054	Cellular Processes	Transport and catabolism	04145 Phagosome
Cluster_51415	K05692	Cellular Processes	Transport and catabolism	04145 Phagosome
Cluster_51743	K07375	Cellular Processes	Transport and catabolism	04145 Phagosome
Cluster_52517	K10956	Cellular Processes	Transport and catabolism	04145 Phagosome
Cluster_5257	K04392	Cellular Processes	Transport and catabolism	04145 Phagosome
Cluster_52984	K07375	Cellular Processes	Transport and catabolism	04145 Phagosome
Cluster_530	"K02350,K04564,K12619,K07374,K17982,K03283,K01623,K14489,K14539,K04077,K12882,K00559,K01456,K12741,K07198,K13420,K13428,K03136,K01191,K05658,K00654,K02993,K05290,K01006"	Cellular Processes	Transport and catabolism	04145 Phagosome
Cluster_53037	K07897	Cellular Processes	Transport and catabolism	04145 Phagosome
Cluster_53240	K08488	Cellular Processes	Transport and catabolism	04145 Phagosome
Cluster_53357	K02155	Cellular Processes	Transport and catabolism	04145 Phagosome
Cluster_54015	K02155	Cellular Processes	Transport and catabolism	04145 Phagosome
Cluster_5433	K00921	Cellular Processes	Transport and catabolism	04145 Phagosome
Cluster_54516	"K07466,K05692"	Cellular Processes	Transport and catabolism	04145 Phagosome
Cluster_5457	"K01897,K04392"	Cellular Processes	Transport and catabolism	04145 Phagosome
Cluster_54726	K07375	Cellular Processes	Transport and catabolism	04145 Phagosome
Cluster_54938	K05692	Cellular Processes	Transport and catabolism	04145 Phagosome
Cluster_55115	K05692	Cellular Processes	Transport and catabolism	04145 Phagosome
Cluster_55529	K10956	Cellular Processes	Transport and catabolism	04145 Phagosome
Cluster_55577	K07897	Cellular Processes	Transport and catabolism	04145 Phagosome
Cluster_5626	K02154	Cellular Processes	Transport and catabolism	04145 Phagosome
Cluster_5627	"K01006,K05658,K14416,K03136,K13428,K13420,K12741,K14457,K00559,K01456,K12882,K04077,K00434,K01623,K03283,K17982,K04392,K07374,K12619,K01876,K01209,K02350"	Cellular Processes	Transport and catabolism	04145 Phagosome
Cluster_56684	K08488	Cellular Processes	Transport and catabolism	04145 Phagosome
Cluster_56718	K02154	Cellular Processes	Transport and catabolism	04145 Phagosome
Cluster_56861	K02154	Cellular Processes	Transport and catabolism	04145 Phagosome
Cluster_57566	K07375	Cellular Processes	Transport and catabolism	04145 Phagosome
Cluster_5764	"K07541,K08488"	Cellular Processes	Transport and catabolism	04145 Phagosome
Cluster_59805	K07375	Cellular Processes	Transport and catabolism	04145 Phagosome
Cluster_59829	K02146	Cellular Processes	Transport and catabolism	04145 Phagosome
Cluster_60122	K05692	Cellular Processes	Transport and catabolism	04145 Phagosome
Cluster_60337	K07375	Cellular Processes	Transport and catabolism	04145 Phagosome
Cluster_60450	K02151	Cellular Processes	Transport and catabolism	04145 Phagosome
Cluster_60551	"K03644,K12882,K13420,K00430,K05658,K05356,K01006,K01115,K01188,K14760,K07374,K01623"	Cellular Processes	Transport and catabolism	04145 Phagosome
Cluster_60564	K07375	Cellular Processes	Transport and catabolism	04145 Phagosome
Cluster_60723	K09481	Cellular Processes	Transport and catabolism	04145 Phagosome
Cluster_60774	"K08967,K08054"	Cellular Processes	Transport and catabolism	04145 Phagosome
Cluster_60938	K09481	Cellular Processes	Transport and catabolism	04145 Phagosome
Cluster_60984	K07342	Cellular Processes	Transport and catabolism	04145 Phagosome
Cluster_62558	K08057	Cellular Processes	Transport and catabolism	04145 Phagosome
Cluster_62561	K07342	Cellular Processes	Transport and catabolism	04145 Phagosome
Cluster_63344	K07374	Cellular Processes	Transport and catabolism	04145 Phagosome
Cluster_63606	K10956	Cellular Processes	Transport and catabolism	04145 Phagosome
Cluster_63713	K07374	Cellular Processes	Transport and catabolism	04145 Phagosome
Cluster_64015	K05692	Cellular Processes	Transport and catabolism	04145 Phagosome
Cluster_64314	K07375	Cellular Processes	Transport and catabolism	04145 Phagosome
Cluster_64546	K07375	Cellular Processes	Transport and catabolism	04145 Phagosome
Cluster_6469	K07374	Cellular Processes	Transport and catabolism	04145 Phagosome
Cluster_64709	K07375	Cellular Processes	Transport and catabolism	04145 Phagosome
Cluster_64847	K07375	Cellular Processes	Transport and catabolism	04145 Phagosome
Cluster_65071	K04392	Cellular Processes	Transport and catabolism	04145 Phagosome
Cluster_65745	"K07466,K05692"	Cellular Processes	Transport and catabolism	04145 Phagosome
Cluster_65881	K03661	Cellular Processes	Transport and catabolism	04145 Phagosome
Cluster_66600	K07375	Cellular Processes	Transport and catabolism	04145 Phagosome
Cluster_66907	K05692	Cellular Processes	Transport and catabolism	04145 Phagosome
Cluster_67170	K02147	Cellular Processes	Transport and catabolism	04145 Phagosome
Cluster_67325	"K01373,K01365"	Cellular Processes	Transport and catabolism	04145 Phagosome
Cluster_67330	K07374	Cellular Processes	Transport and catabolism	04145 Phagosome
Cluster_67586	K08488	Cellular Processes	Transport and catabolism	04145 Phagosome
Cluster_67728	K05692	Cellular Processes	Transport and catabolism	04145 Phagosome
Cluster_67731	K08054	Cellular Processes	Transport and catabolism	04145 Phagosome
Cluster_67773	K01365	Cellular Processes	Transport and catabolism	04145 Phagosome
Cluster_68707	K07374	Cellular Processes	Transport and catabolism	04145 Phagosome
Cluster_6989	K04392	Cellular Processes	Transport and catabolism	04145 Phagosome
Cluster_70089	K05692	Cellular Processes	Transport and catabolism	04145 Phagosome
Cluster_70831	K02150	Cellular Processes	Transport and catabolism	04145 Phagosome
Cluster_70971	K08517	Cellular Processes	Transport and catabolism	04145 Phagosome
Cluster_71166	K01365	Cellular Processes	Transport and catabolism	04145 Phagosome
Cluster_7122	K01365	Cellular Processes	Transport and catabolism	04145 Phagosome
Cluster_71387	K07375	Cellular Processes	Transport and catabolism	04145 Phagosome
Cluster_7221	"K00921,K00847,K04077"	Cellular Processes	Transport and catabolism	04145 Phagosome
Cluster_72384	K10956	Cellular Processes	Transport and catabolism	04145 Phagosome
Cluster_7256	"K04077,K00921"	Cellular Processes	Transport and catabolism	04145 Phagosome
Cluster_73709	K07375	Cellular Processes	Transport and catabolism	04145 Phagosome
Cluster_73969	K03661	Cellular Processes	Transport and catabolism	04145 Phagosome
Cluster_74011	K07889	Cellular Processes	Transport and catabolism	04145 Phagosome
Cluster_7427	K07374	Cellular Processes	Transport and catabolism	04145 Phagosome
Cluster_74794	K02154	Cellular Processes	Transport and catabolism	04145 Phagosome
Cluster_75260	K02155	Cellular Processes	Transport and catabolism	04145 Phagosome
Cluster_75364	K07375	Cellular Processes	Transport and catabolism	04145 Phagosome
Cluster_7545	"K01365,K01373"	Cellular Processes	Transport and catabolism	04145 Phagosome
Cluster_75961	K05692	Cellular Processes	Transport and catabolism	04145 Phagosome
Cluster_76551	K07374	Cellular Processes	Transport and catabolism	04145 Phagosome
Cluster_76977	K09481	Cellular Processes	Transport and catabolism	04145 Phagosome
Cluster_77305	K08057	Cellular Processes	Transport and catabolism	04145 Phagosome
Cluster_7745	K10956	Cellular Processes	Transport and catabolism	04145 Phagosome
Cluster_77789	K02155	Cellular Processes	Transport and catabolism	04145 Phagosome
Cluster_7824	"K07897,K07904"	Cellular Processes	Transport and catabolism	04145 Phagosome
Cluster_78853	K08054	Cellular Processes	Transport and catabolism	04145 Phagosome
Cluster_79146	K07375	Cellular Processes	Transport and catabolism	04145 Phagosome
Cluster_7957	K04392	Cellular Processes	Transport and catabolism	04145 Phagosome
Cluster_79616	K08057	Cellular Processes	Transport and catabolism	04145 Phagosome
Cluster_79881	K08488	Cellular Processes	Transport and catabolism	04145 Phagosome
Cluster_8017	"K04077,K00921"	Cellular Processes	Transport and catabolism	04145 Phagosome
Cluster_81968	K08057	Cellular Processes	Transport and catabolism	04145 Phagosome
Cluster_8208	K00914	Cellular Processes	Transport and catabolism	04145 Phagosome
Cluster_8218	K07374	Cellular Processes	Transport and catabolism	04145 Phagosome
Cluster_82187	K07897	Cellular Processes	Transport and catabolism	04145 Phagosome
Cluster_82202	K02152	Cellular Processes	Transport and catabolism	04145 Phagosome
Cluster_8221	K10956	Cellular Processes	Transport and catabolism	04145 Phagosome
Cluster_82282	K04392	Cellular Processes	Transport and catabolism	04145 Phagosome
Cluster_82931	K05692	Cellular Processes	Transport and catabolism	04145 Phagosome
Cluster_83265	K07897	Cellular Processes	Transport and catabolism	04145 Phagosome
Cluster_84115	K07374	Cellular Processes	Transport and catabolism	04145 Phagosome
Cluster_84648	K08517	Cellular Processes	Transport and catabolism	04145 Phagosome
Cluster_84727	K07375	Cellular Processes	Transport and catabolism	04145 Phagosome
Cluster_85498	K01365	Cellular Processes	Transport and catabolism	04145 Phagosome
Cluster_85553	K02154	Cellular Processes	Transport and catabolism	04145 Phagosome
Cluster_86015	K02152	Cellular Processes	Transport and catabolism	04145 Phagosome
Cluster_86026	K05692	Cellular Processes	Transport and catabolism	04145 Phagosome
Cluster_86396	K07375	Cellular Processes	Transport and catabolism	04145 Phagosome
Cluster_87186	K09481	Cellular Processes	Transport and catabolism	04145 Phagosome
Cluster_87395	K07375	Cellular Processes	Transport and catabolism	04145 Phagosome
Cluster_87696	K05692	Cellular Processes	Transport and catabolism	04145 Phagosome
Cluster_87700	K07375	Cellular Processes	Transport and catabolism	04145 Phagosome
Cluster_8776	"K13420,K02146,K13415,K13416"	Cellular Processes	Transport and catabolism	04145 Phagosome
Cluster_89108	K08054	Cellular Processes	Transport and catabolism	04145 Phagosome
Cluster_8996	"K04392,K04393"	Cellular Processes	Transport and catabolism	04145 Phagosome
Cluster_90326	K07375	Cellular Processes	Transport and catabolism	04145 Phagosome
Cluster_90424	K02154	Cellular Processes	Transport and catabolism	04145 Phagosome
Cluster_90586	K07374	Cellular Processes	Transport and catabolism	04145 Phagosome
Cluster_90884	K07342	Cellular Processes	Transport and catabolism	04145 Phagosome
Cluster_91058	K07374	Cellular Processes	Transport and catabolism	04145 Phagosome
Cluster_9174	K10956	Cellular Processes	Transport and catabolism	04145 Phagosome
Cluster_92419	K05692	Cellular Processes	Transport and catabolism	04145 Phagosome
Cluster_92897	K05692	Cellular Processes	Transport and catabolism	04145 Phagosome
Cluster_94224	K07375	Cellular Processes	Transport and catabolism	04145 Phagosome
Cluster_94646	K05692	Cellular Processes	Transport and catabolism	04145 Phagosome
Cluster_9502	K04392	Cellular Processes	Transport and catabolism	04145 Phagosome
Cluster_95271	K07375	Cellular Processes	Transport and catabolism	04145 Phagosome
Cluster_95768	K08057	Cellular Processes	Transport and catabolism	04145 Phagosome
Cluster_9670	K01365	Cellular Processes	Transport and catabolism	04145 Phagosome
Cluster_969	"K07374,K17982,K03283,K01623,K12619,K01209,K01876,K02350,K04564,K05290,K01006,K14400,K03136,K05658,K07198,K13420,K13428,K04077,K12882,K01456,K00559"	Cellular Processes	Transport and catabolism	04145 Phagosome
Cluster_9736	K02145	Cellular Processes	Transport and catabolism	04145 Phagosome
Cluster_97445	"K07375,K13430"	Cellular Processes	Transport and catabolism	04145 Phagosome
Cluster_9870	K02144	Cellular Processes	Transport and catabolism	04145 Phagosome
Cluster_98856	K07375	Cellular Processes	Transport and catabolism	04145 Phagosome
Cluster_98922	K02151	Cellular Processes	Transport and catabolism	04145 Phagosome
Cluster_99126	K02147	Cellular Processes	Transport and catabolism	04145 Phagosome
Cluster_99300	K02146	Cellular Processes	Transport and catabolism	04145 Phagosome
Cluster_10035	K11247	Cellular Processes	Transport and catabolism	04144 Endocytosis
Cluster_10044	K05747	Cellular Processes	Transport and catabolism	04144 Endocytosis
Cluster_1012	"K10396,K14565"	Cellular Processes	Transport and catabolism	04144 Endocytosis
Cluster_10149	K19476	Cellular Processes	Transport and catabolism	04144 Endocytosis
Cluster_1016	"K02350,K07198,K10590,K03363,K12619,K01738,K05658,K03283"	Cellular Processes	Transport and catabolism	04144 Endocytosis
Cluster_101659	K18443	Cellular Processes	Transport and catabolism	04144 Endocytosis
Cluster_10181	"K11839,K12493"	Cellular Processes	Transport and catabolism	04144 Endocytosis
Cluster_1019	"K11839,K12493"	Cellular Processes	Transport and catabolism	04144 Endocytosis
Cluster_102	"K10396,K18442"	Cellular Processes	Transport and catabolism	04144 Endocytosis
Cluster_102342	K07901	Cellular Processes	Transport and catabolism	04144 Endocytosis
Cluster_10247	"K08852,K16226,K02183,K01115,K13414,K05349,K14309,K03283"	Cellular Processes	Transport and catabolism	04144 Endocytosis
Cluster_102868	K12492	Cellular Processes	Transport and catabolism	04144 Endocytosis
Cluster_1034	K12486	Cellular Processes	Transport and catabolism	04144 Endocytosis
Cluster_10354	K03283	Cellular Processes	Transport and catabolism	04144 Endocytosis
Cluster_10365	K18442	Cellular Processes	Transport and catabolism	04144 Endocytosis
Cluster_10374	"K12489,K14497,K12616,K01251"	Cellular Processes	Transport and catabolism	04144 Endocytosis
Cluster_10376	K07904	Cellular Processes	Transport and catabolism	04144 Endocytosis
Cluster_1041	"K12619,K01738,K05658,K03283,K02350,K07198,K03363,K10590"	Cellular Processes	Transport and catabolism	04144 Endocytosis
Cluster_104159	K07937	Cellular Processes	Transport and catabolism	04144 Endocytosis
Cluster_1043	K12486	Cellular Processes	Transport and catabolism	04144 Endocytosis
Cluster_10441	K18442	Cellular Processes	Transport and catabolism	04144 Endocytosis
Cluster_104877	"K12472,K09291"	Cellular Processes	Transport and catabolism	04144 Endocytosis
Cluster_1049	"K13457,K13525,K16226,K08852,K13412,K14314,K14309,K16225,K03283"	Cellular Processes	Transport and catabolism	04144 Endocytosis
Cluster_104945	K03283	Cellular Processes	Transport and catabolism	04144 Endocytosis
Cluster_105140	K07937	Cellular Processes	Transport and catabolism	04144 Endocytosis
Cluster_1053	"K03254,K12472,K10866,K09291"	Cellular Processes	Transport and catabolism	04144 Endocytosis
Cluster_10538	K12486	Cellular Processes	Transport and catabolism	04144 Endocytosis
Cluster_105697	K01528	Cellular Processes	Transport and catabolism	04144 Endocytosis
Cluster_10591	K19476	Cellular Processes	Transport and catabolism	04144 Endocytosis
Cluster_10612	K19366	Cellular Processes	Transport and catabolism	04144 Endocytosis
Cluster_1062	K11824	Cellular Processes	Transport and catabolism	04144 Endocytosis
Cluster_10626	K12471	Cellular Processes	Transport and catabolism	04144 Endocytosis
Cluster_106285	K17917	Cellular Processes	Transport and catabolism	04144 Endocytosis
Cluster_1063	"K14565,K10396"	Cellular Processes	Transport and catabolism	04144 Endocytosis
Cluster_1073	K05747	Cellular Processes	Transport and catabolism	04144 Endocytosis
Cluster_108106	K07937	Cellular Processes	Transport and catabolism	04144 Endocytosis
Cluster_109005	K03283	Cellular Processes	Transport and catabolism	04144 Endocytosis
Cluster_1100	"K05349,K14309,K07466,K02183,K01115,K13414,K03283,K16225,K08852,K16226,K16911"	Cellular Processes	Transport and catabolism	04144 Endocytosis
Cluster_110067	K03283	Cellular Processes	Transport and catabolism	04144 Endocytosis
Cluster_110088	"K09291,K12472"	Cellular Processes	Transport and catabolism	04144 Endocytosis
Cluster_1110	"K03254,K10396,K09291,K10866"	Cellular Processes	Transport and catabolism	04144 Endocytosis
Cluster_11121	"K12493,K11839,K01689"	Cellular Processes	Transport and catabolism	04144 Endocytosis
Cluster_111853	K07901	Cellular Processes	Transport and catabolism	04144 Endocytosis
Cluster_112047	K07937	Cellular Processes	Transport and catabolism	04144 Endocytosis
Cluster_112583	K12200	Cellular Processes	Transport and catabolism	04144 Endocytosis
Cluster_112891	K03283	Cellular Processes	Transport and catabolism	04144 Endocytosis
Cluster_11306	K12196	Cellular Processes	Transport and catabolism	04144 Endocytosis
Cluster_113089	K01115	Cellular Processes	Transport and catabolism	04144 Endocytosis
Cluster_11310	K19476	Cellular Processes	Transport and catabolism	04144 Endocytosis
Cluster_113466	K07904	Cellular Processes	Transport and catabolism	04144 Endocytosis
Cluster_113476	K07937	Cellular Processes	Transport and catabolism	04144 Endocytosis
Cluster_113940	K12486	Cellular Processes	Transport and catabolism	04144 Endocytosis
Cluster_1140	K05747	Cellular Processes	Transport and catabolism	04144 Endocytosis
Cluster_11434	K12200	Cellular Processes	Transport and catabolism	04144 Endocytosis
Cluster_11528	K12196	Cellular Processes	Transport and catabolism	04144 Endocytosis
Cluster_115906	K12492	Cellular Processes	Transport and catabolism	04144 Endocytosis
Cluster_115964	K04646	Cellular Processes	Transport and catabolism	04144 Endocytosis
Cluster_11642	"K12486,K13421"	Cellular Processes	Transport and catabolism	04144 Endocytosis
Cluster_11643	K05747	Cellular Processes	Transport and catabolism	04144 Endocytosis
Cluster_1166	"K14565,K10396"	Cellular Processes	Transport and catabolism	04144 Endocytosis
Cluster_1169	"K12493,K11839,K12847,K01689"	Cellular Processes	Transport and catabolism	04144 Endocytosis
Cluster_11719	K12199	Cellular Processes	Transport and catabolism	04144 Endocytosis
Cluster_117606	K01528	Cellular Processes	Transport and catabolism	04144 Endocytosis
Cluster_118104	K19366	Cellular Processes	Transport and catabolism	04144 Endocytosis
Cluster_11869	K11247	Cellular Processes	Transport and catabolism	04144 Endocytosis
Cluster_11891	K03283	Cellular Processes	Transport and catabolism	04144 Endocytosis
Cluster_119382	K07897	Cellular Processes	Transport and catabolism	04144 Endocytosis
Cluster_1196	"K12493,K11839"	Cellular Processes	Transport and catabolism	04144 Endocytosis
Cluster_119660	K04646	Cellular Processes	Transport and catabolism	04144 Endocytosis
Cluster_120106	K07937	Cellular Processes	Transport and catabolism	04144 Endocytosis
Cluster_120157	"K03231,K12196"	Cellular Processes	Transport and catabolism	04144 Endocytosis
Cluster_1206	"K10960,K00679,K01206,K10396,K12897"	Cellular Processes	Transport and catabolism	04144 Endocytosis
Cluster_12080	"K16226,K03283,K16225,K14314"	Cellular Processes	Transport and catabolism	04144 Endocytosis
Cluster_12142	"K12486,K13421"	Cellular Processes	Transport and catabolism	04144 Endocytosis
Cluster_12246	K12471	Cellular Processes	Transport and catabolism	04144 Endocytosis
Cluster_12302	"K03136,K03283"	Cellular Processes	Transport and catabolism	04144 Endocytosis
Cluster_1236	"K09291,K00826,K10866,K12472"	Cellular Processes	Transport and catabolism	04144 Endocytosis
Cluster_124	"K05756,K00566,K01738,K12819,K13356,K13457,K05666,K16196,K05605,K01191,K15086"	Cellular Processes	Transport and catabolism	04144 Endocytosis
Cluster_1244	"K02350,K00627,K12619,K07374,K14760,K03283,K01623,K04077,K14539,K12882,K01456,K12741,K07198,K13420,K13428,K01191,K05658,K00654,K05356"	Cellular Processes	Transport and catabolism	04144 Endocytosis
Cluster_125	"K10396,K12472,K09291,K10866"	Cellular Processes	Transport and catabolism	04144 Endocytosis
Cluster_12562	"K12196,K03231,K13525"	Cellular Processes	Transport and catabolism	04144 Endocytosis
Cluster_126	"K12489,K14497,K14487,K03243,K08081,K04079,K00815,K07466,K01251,K17982"	Cellular Processes	Transport and catabolism	04144 Endocytosis
Cluster_12623	K12479	Cellular Processes	Transport and catabolism	04144 Endocytosis
Cluster_12818	"K12472,K13420,K09291"	Cellular Processes	Transport and catabolism	04144 Endocytosis
Cluster_12909	K12471	Cellular Processes	Transport and catabolism	04144 Endocytosis
Cluster_12940	K03283	Cellular Processes	Transport and catabolism	04144 Endocytosis
Cluster_13023	K11826	Cellular Processes	Transport and catabolism	04144 Endocytosis
Cluster_1322	K11825	Cellular Processes	Transport and catabolism	04144 Endocytosis
Cluster_13275	K07937	Cellular Processes	Transport and catabolism	04144 Endocytosis
Cluster_13342	K05757	Cellular Processes	Transport and catabolism	04144 Endocytosis
Cluster_13357	"K13414,K01115,K03283,K16911,K08852,K16226,K05349,K14309,K07466,K02183"	Cellular Processes	Transport and catabolism	04144 Endocytosis
Cluster_13458	K12493	Cellular Processes	Transport and catabolism	04144 Endocytosis
Cluster_135	"K00654,K05658,K01191,K05356,K01456,K00559,K12882,K14539,K04077,K13428,K13420,K07198,K12741,K12619,K01623,K03283,K14760,K07374,K02350,K00627"	Cellular Processes	Transport and catabolism	04144 Endocytosis
Cluster_1352	"K12493,K12847,K01689,K03243,K11839"	Cellular Processes	Transport and catabolism	04144 Endocytosis
Cluster_13520	"K03283,K04646,K01115,K13414,K08852,K16226,K14309,K05349,K02183"	Cellular Processes	Transport and catabolism	04144 Endocytosis
Cluster_13577	K05747	Cellular Processes	Transport and catabolism	04144 Endocytosis
Cluster_1368	"K03254,K09291,K00826,K12472"	Cellular Processes	Transport and catabolism	04144 Endocytosis
Cluster_13723	"K13525,K03231,K14571,K12196"	Cellular Processes	Transport and catabolism	04144 Endocytosis
Cluster_13830	"K07901,K07904"	Cellular Processes	Transport and catabolism	04144 Endocytosis
Cluster_13843	K18468	Cellular Processes	Transport and catabolism	04144 Endocytosis
Cluster_13878	K19366	Cellular Processes	Transport and catabolism	04144 Endocytosis
Cluster_1390	"K13457,K07466,K02183,K05349,K14309,K16226,K08852,K16911,K01115,K04646,K13414,K03283,K16225"	Cellular Processes	Transport and catabolism	04144 Endocytosis
Cluster_1397	K10396	Cellular Processes	Transport and catabolism	04144 Endocytosis
Cluster_1410	"K12471,K14442,K12823"	Cellular Processes	Transport and catabolism	04144 Endocytosis
Cluster_14139	K05747	Cellular Processes	Transport and catabolism	04144 Endocytosis
Cluster_14277	K07901	Cellular Processes	Transport and catabolism	04144 Endocytosis
Cluster_14414	K12472	Cellular Processes	Transport and catabolism	04144 Endocytosis
Cluster_14426	K03283	Cellular Processes	Transport and catabolism	04144 Endocytosis
Cluster_14447	"K01206,K10396,K01188,K10960,K00679,K01969"	Cellular Processes	Transport and catabolism	04144 Endocytosis
Cluster_14451	K05747	Cellular Processes	Transport and catabolism	04144 Endocytosis
Cluster_14458	K00889	Cellular Processes	Transport and catabolism	04144 Endocytosis
Cluster_14494	"K10396,K14565"	Cellular Processes	Transport and catabolism	04144 Endocytosis
Cluster_1450	"K12483,K12472"	Cellular Processes	Transport and catabolism	04144 Endocytosis
Cluster_14566	"K12493,K11839"	Cellular Processes	Transport and catabolism	04144 Endocytosis
Cluster_14599	"K19476,K13946"	Cellular Processes	Transport and catabolism	04144 Endocytosis
Cluster_14604	"K00679,K00514,K01206,K01188,K10396"	Cellular Processes	Transport and catabolism	04144 Endocytosis
Cluster_14678	"K10960,K00514,K01206,K10396"	Cellular Processes	Transport and catabolism	04144 Endocytosis
Cluster_147	"K10396,K12472,K09291,K10866"	Cellular Processes	Transport and catabolism	04144 Endocytosis
Cluster_1480	"K00826,K09291,K10866,K12472"	Cellular Processes	Transport and catabolism	04144 Endocytosis
Cluster_1481	K12486	Cellular Processes	Transport and catabolism	04144 Endocytosis
Cluster_14826	K03283	Cellular Processes	Transport and catabolism	04144 Endocytosis
Cluster_14830	"K11839,K12493"	Cellular Processes	Transport and catabolism	04144 Endocytosis
Cluster_14850	K12183	Cellular Processes	Transport and catabolism	04144 Endocytosis
Cluster_14870	K07901	Cellular Processes	Transport and catabolism	04144 Endocytosis
Cluster_1491	"K16225,K03283,K13459,K08852,K13412,K16911,K14309,K13457"	Cellular Processes	Transport and catabolism	04144 Endocytosis
Cluster_14930	"K01183,K13417,K13436,K13416,K03283"	Cellular Processes	Transport and catabolism	04144 Endocytosis
Cluster_14936	"K14001,K10365"	Cellular Processes	Transport and catabolism	04144 Endocytosis
Cluster_14976	K12486	Cellular Processes	Transport and catabolism	04144 Endocytosis
Cluster_1499	"K13459,K16226,K08852,K13412,K16911,K03283,K16225,K02183,K13457"	Cellular Processes	Transport and catabolism	04144 Endocytosis
Cluster_15039	K12471	Cellular Processes	Transport and catabolism	04144 Endocytosis
Cluster_15050	K10591	Cellular Processes	Transport and catabolism	04144 Endocytosis
Cluster_1516	"K12472,K09291"	Cellular Processes	Transport and catabolism	04144 Endocytosis
Cluster_15187	K19367	Cellular Processes	Transport and catabolism	04144 Endocytosis
Cluster_15210	K03283	Cellular Processes	Transport and catabolism	04144 Endocytosis
Cluster_15224	"K04043,K03283"	Cellular Processes	Transport and catabolism	04144 Endocytosis
Cluster_15230	K07904	Cellular Processes	Transport and catabolism	04144 Endocytosis
Cluster_1537	"K18857,K11824"	Cellular Processes	Transport and catabolism	04144 Endocytosis
Cluster_15403	K12196	Cellular Processes	Transport and catabolism	04144 Endocytosis
Cluster_15408	K11827	Cellular Processes	Transport and catabolism	04144 Endocytosis
Cluster_15436	K12183	Cellular Processes	Transport and catabolism	04144 Endocytosis
Cluster_15484	K11826	Cellular Processes	Transport and catabolism	04144 Endocytosis
Cluster_1549	K10396	Cellular Processes	Transport and catabolism	04144 Endocytosis
Cluster_15535	K12472	Cellular Processes	Transport and catabolism	04144 Endocytosis
Cluster_15586	"K01206,K10396,K00679,K00514"	Cellular Processes	Transport and catabolism	04144 Endocytosis
Cluster_15706	K17917	Cellular Processes	Transport and catabolism	04144 Endocytosis
Cluster_15806	"K11262,K18443"	Cellular Processes	Transport and catabolism	04144 Endocytosis
Cluster_15812	K17917	Cellular Processes	Transport and catabolism	04144 Endocytosis
Cluster_15819	K12471	Cellular Processes	Transport and catabolism	04144 Endocytosis
Cluster_1586	"K14309,K13459,K08852,K16226,K16911,K03283,K16225"	Cellular Processes	Transport and catabolism	04144 Endocytosis
Cluster_15941	"K03283,K03136"	Cellular Processes	Transport and catabolism	04144 Endocytosis
Cluster_15957	K07904	Cellular Processes	Transport and catabolism	04144 Endocytosis
Cluster_16016	K07901	Cellular Processes	Transport and catabolism	04144 Endocytosis
Cluster_16078	"K01176,K09291,K12472"	Cellular Processes	Transport and catabolism	04144 Endocytosis
Cluster_16154	K10396	Cellular Processes	Transport and catabolism	04144 Endocytosis
Cluster_16176	"K05349,K14309,K07466,K02183,K04646,K01115,K13414,K03283,K08852,K16226,K16911"	Cellular Processes	Transport and catabolism	04144 Endocytosis
Cluster_16223	"K10396,K01188,K10960,K00679"	Cellular Processes	Transport and catabolism	04144 Endocytosis
Cluster_16283	"K10396,K01188,K01206,K10960,K00679"	Cellular Processes	Transport and catabolism	04144 Endocytosis
Cluster_16408	K19366	Cellular Processes	Transport and catabolism	04144 Endocytosis
Cluster_16461	K03283	Cellular Processes	Transport and catabolism	04144 Endocytosis
Cluster_16476	"K07889,K07887"	Cellular Processes	Transport and catabolism	04144 Endocytosis
Cluster_16523	"K01969,K00679,K10960,K01188,K10396,K01206"	Cellular Processes	Transport and catabolism	04144 Endocytosis
Cluster_16529	K17917	Cellular Processes	Transport and catabolism	04144 Endocytosis
Cluster_16609	"K12897,K12489"	Cellular Processes	Transport and catabolism	04144 Endocytosis
Cluster_16673	"K12472,K10866,K09291"	Cellular Processes	Transport and catabolism	04144 Endocytosis
Cluster_16710	K10396	Cellular Processes	Transport and catabolism	04144 Endocytosis
Cluster_16721	"K00679,K10960,K01969,K01206,K01188,K10396"	Cellular Processes	Transport and catabolism	04144 Endocytosis
Cluster_16850	"K08852,K16226,K01115,K13414,K03283,K07466,K02183,K05349,K14309"	Cellular Processes	Transport and catabolism	04144 Endocytosis
Cluster_169	K00889	Cellular Processes	Transport and catabolism	04144 Endocytosis
Cluster_16982	K03283	Cellular Processes	Transport and catabolism	04144 Endocytosis
Cluster_1705	"K00801,K11247"	Cellular Processes	Transport and catabolism	04144 Endocytosis
Cluster_1707	"K12493,K13356,K01689,K12847,K11839"	Cellular Processes	Transport and catabolism	04144 Endocytosis
Cluster_17091	"K07901,K07936"	Cellular Processes	Transport and catabolism	04144 Endocytosis
Cluster_17163	"K12489,K12897"	Cellular Processes	Transport and catabolism	04144 Endocytosis
Cluster_17180	"K08852,K16226,K03283,K13414,K01115,K02183,K07466,K13448,K14309,K05349"	Cellular Processes	Transport and catabolism	04144 Endocytosis
Cluster_17205	"K10396,K01188,K01206,K00679"	Cellular Processes	Transport and catabolism	04144 Endocytosis
Cluster_17226	K07897	Cellular Processes	Transport and catabolism	04144 Endocytosis
Cluster_17274	K03283	Cellular Processes	Transport and catabolism	04144 Endocytosis
Cluster_17331	K01528	Cellular Processes	Transport and catabolism	04144 Endocytosis
Cluster_1742	"K12483,K12472"	Cellular Processes	Transport and catabolism	04144 Endocytosis
Cluster_17568	K12471	Cellular Processes	Transport and catabolism	04144 Endocytosis
Cluster_17703	K05747	Cellular Processes	Transport and catabolism	04144 Endocytosis
Cluster_17772	K12486	Cellular Processes	Transport and catabolism	04144 Endocytosis
Cluster_17802	"K10960,K00679,K10396,K01188,K01206"	Cellular Processes	Transport and catabolism	04144 Endocytosis
Cluster_17942	"K10960,K00679,K10396,K01188"	Cellular Processes	Transport and catabolism	04144 Endocytosis
Cluster_17986	K18466	Cellular Processes	Transport and catabolism	04144 Endocytosis
Cluster_18004	"K07466,K02183,K05349,K14309,K08852,K16226,K16911,K01115,K03283"	Cellular Processes	Transport and catabolism	04144 Endocytosis
Cluster_18057	"K03843,K12188"	Cellular Processes	Transport and catabolism	04144 Endocytosis
Cluster_18120	"K13416,K13459,K13412,K13436,K16224,K12489,K01183,K00276,K13429,K13430"	Cellular Processes	Transport and catabolism	04144 Endocytosis
Cluster_1818	K12489	Cellular Processes	Transport and catabolism	04144 Endocytosis
Cluster_18243	K01528	Cellular Processes	Transport and catabolism	04144 Endocytosis
Cluster_18330	K18442	Cellular Processes	Transport and catabolism	04144 Endocytosis
Cluster_18404	K07904	Cellular Processes	Transport and catabolism	04144 Endocytosis
Cluster_1843	K11825	Cellular Processes	Transport and catabolism	04144 Endocytosis
Cluster_1844	K01115	Cellular Processes	Transport and catabolism	04144 Endocytosis
Cluster_18499	K05747	Cellular Processes	Transport and catabolism	04144 Endocytosis
Cluster_18560	"K10396,K01188,K00679"	Cellular Processes	Transport and catabolism	04144 Endocytosis
Cluster_18627	"K02183,K07466,K14309,K05349,K16226,K08852,K03283,K01115,K04646,K13414"	Cellular Processes	Transport and catabolism	04144 Endocytosis
Cluster_18766	"K01188,K10396,K01206,K00514,K00679,K10960"	Cellular Processes	Transport and catabolism	04144 Endocytosis
Cluster_188	K18442	Cellular Processes	Transport and catabolism	04144 Endocytosis
Cluster_18802	"K12493,K11839,K12847,K01689"	Cellular Processes	Transport and catabolism	04144 Endocytosis
Cluster_190	K00889	Cellular Processes	Transport and catabolism	04144 Endocytosis
Cluster_19058	K05747	Cellular Processes	Transport and catabolism	04144 Endocytosis
Cluster_19110	K12189	Cellular Processes	Transport and catabolism	04144 Endocytosis
Cluster_19158	"K05349,K14309,K07466,K02183,K13414,K04646,K01115,K03283,K16226,K08852"	Cellular Processes	Transport and catabolism	04144 Endocytosis
Cluster_19175	K12486	Cellular Processes	Transport and catabolism	04144 Endocytosis
Cluster_19232	"K00430,K05747,K03006,K14317"	Cellular Processes	Transport and catabolism	04144 Endocytosis
Cluster_19399	K03283	Cellular Processes	Transport and catabolism	04144 Endocytosis
Cluster_1944	"K09291,K10866,K03254,K10396"	Cellular Processes	Transport and catabolism	04144 Endocytosis
Cluster_19470	K11826	Cellular Processes	Transport and catabolism	04144 Endocytosis
Cluster_195	"K17982,K14760,K03283,K01623,K12619,K01876,K01209,K02350,K01006,K01191,K03136,K14416,K00654,K05658,K07198,K12741,K13420,K12882,K14489,K04077,K14539,K01456,K00559"	Cellular Processes	Transport and catabolism	04144 Endocytosis
Cluster_1952	"K02183,K13420,K13459,K08852,K16226,K03283,K16225"	Cellular Processes	Transport and catabolism	04144 Endocytosis
Cluster_19543	K00889	Cellular Processes	Transport and catabolism	04144 Endocytosis
Cluster_19553	K12471	Cellular Processes	Transport and catabolism	04144 Endocytosis
Cluster_1966	K00889	Cellular Processes	Transport and catabolism	04144 Endocytosis
Cluster_1974	"K00801,K11247"	Cellular Processes	Transport and catabolism	04144 Endocytosis
Cluster_19833	"K02183,K07466,K14309,K05349,K16226,K08852,K03283,K01115,K04646,K13414"	Cellular Processes	Transport and catabolism	04144 Endocytosis
Cluster_19855	K07937	Cellular Processes	Transport and catabolism	04144 Endocytosis
Cluster_1989	"K09291,K12472"	Cellular Processes	Transport and catabolism	04144 Endocytosis
Cluster_19927	"K05349,K14309,K07466,K02183,K04646,K01115,K13414,K03283,K08852,K16226"	Cellular Processes	Transport and catabolism	04144 Endocytosis
Cluster_1995	"K12472,K09291,K10866"	Cellular Processes	Transport and catabolism	04144 Endocytosis
Cluster_20051	"K07905,K07904"	Cellular Processes	Transport and catabolism	04144 Endocytosis
Cluster_201	K00889	Cellular Processes	Transport and catabolism	04144 Endocytosis
Cluster_20123	"K07889,K07887,K07904"	Cellular Processes	Transport and catabolism	04144 Endocytosis
Cluster_2013	K10396	Cellular Processes	Transport and catabolism	04144 Endocytosis
Cluster_20137	K12191	Cellular Processes	Transport and catabolism	04144 Endocytosis
Cluster_20145	K01528	Cellular Processes	Transport and catabolism	04144 Endocytosis
Cluster_20317	K12486	Cellular Processes	Transport and catabolism	04144 Endocytosis
Cluster_20432	"K00566,K05756,K05605"	Cellular Processes	Transport and catabolism	04144 Endocytosis
Cluster_2050	"K12493,K11839,K01689,K12847"	Cellular Processes	Transport and catabolism	04144 Endocytosis
Cluster_20577	"K01206,K01188,K10396,K00679,K10960"	Cellular Processes	Transport and catabolism	04144 Endocytosis
Cluster_2060	K11824	Cellular Processes	Transport and catabolism	04144 Endocytosis
Cluster_2070	K10396	Cellular Processes	Transport and catabolism	04144 Endocytosis
Cluster_20706	K10364	Cellular Processes	Transport and catabolism	04144 Endocytosis
Cluster_2072	"K12472,K10866,K09291"	Cellular Processes	Transport and catabolism	04144 Endocytosis
Cluster_20724	"K16226,K08852,K01115,K04646,K13414,K03283,K07466,K02183,K05349,K14309"	Cellular Processes	Transport and catabolism	04144 Endocytosis
Cluster_2077	"K03283,K16226,K02905"	Cellular Processes	Transport and catabolism	04144 Endocytosis
Cluster_20781	K12189	Cellular Processes	Transport and catabolism	04144 Endocytosis
Cluster_20796	K18442	Cellular Processes	Transport and catabolism	04144 Endocytosis
Cluster_20862	K12185	Cellular Processes	Transport and catabolism	04144 Endocytosis
Cluster_20891	K12200	Cellular Processes	Transport and catabolism	04144 Endocytosis
Cluster_20914	"K03283,K01115,K04646,K13414,K08852,K16226,K14309,K05349,K02183,K07466"	Cellular Processes	Transport and catabolism	04144 Endocytosis
Cluster_21	"K15086,K05605,K01191,K16196,K05666,K10599,K13457,K01689,K13356,K12819,K01738,K03062,K14513,K05756,K00566"	Cellular Processes	Transport and catabolism	04144 Endocytosis
Cluster_21008	K12471	Cellular Processes	Transport and catabolism	04144 Endocytosis
Cluster_21019	"K05605,K16196,K00566,K05756,K01738,K03062"	Cellular Processes	Transport and catabolism	04144 Endocytosis
Cluster_2113	K10396	Cellular Processes	Transport and catabolism	04144 Endocytosis
Cluster_21156	"K03283,K16225,K16226,K08852,K16911,K13459,K00514,K13457,K04706"	Cellular Processes	Transport and catabolism	04144 Endocytosis
Cluster_215	K18442	Cellular Processes	Transport and catabolism	04144 Endocytosis
Cluster_21517	K12492	Cellular Processes	Transport and catabolism	04144 Endocytosis
Cluster_21670	K05747	Cellular Processes	Transport and catabolism	04144 Endocytosis
Cluster_21708	K11826	Cellular Processes	Transport and catabolism	04144 Endocytosis
Cluster_21736	K12471	Cellular Processes	Transport and catabolism	04144 Endocytosis
Cluster_2176	K18443	Cellular Processes	Transport and catabolism	04144 Endocytosis
Cluster_2178	"K06699,K12472"	Cellular Processes	Transport and catabolism	04144 Endocytosis
Cluster_2184	K19476	Cellular Processes	Transport and catabolism	04144 Endocytosis
Cluster_21901	K18466	Cellular Processes	Transport and catabolism	04144 Endocytosis
Cluster_21942	"K12847,K01689,K11839"	Cellular Processes	Transport and catabolism	04144 Endocytosis
Cluster_21974	K12472	Cellular Processes	Transport and catabolism	04144 Endocytosis
Cluster_22	"K05756,K00566,K12819,K01738,K05666,K10599,K13356,K13457,K15086,K05605,K01191,K16196"	Cellular Processes	Transport and catabolism	04144 Endocytosis
Cluster_22053	K07897	Cellular Processes	Transport and catabolism	04144 Endocytosis
Cluster_2211	K10396	Cellular Processes	Transport and catabolism	04144 Endocytosis
Cluster_22153	"K09291,K12472"	Cellular Processes	Transport and catabolism	04144 Endocytosis
Cluster_22339	K03283	Cellular Processes	Transport and catabolism	04144 Endocytosis
Cluster_224	"K17982,K08503,K04079,K08081,K00815,K01251,K07466,K12489,K05391,K03243,K14497,K12616"	Cellular Processes	Transport and catabolism	04144 Endocytosis
Cluster_22408	"K03283,K04043"	Cellular Processes	Transport and catabolism	04144 Endocytosis
Cluster_22628	"K04043,K03283"	Cellular Processes	Transport and catabolism	04144 Endocytosis
Cluster_22670	K07937	Cellular Processes	Transport and catabolism	04144 Endocytosis
Cluster_22704	K07904	Cellular Processes	Transport and catabolism	04144 Endocytosis
Cluster_22760	K07901	Cellular Processes	Transport and catabolism	04144 Endocytosis
Cluster_22822	K12483	Cellular Processes	Transport and catabolism	04144 Endocytosis
Cluster_2287	K12489	Cellular Processes	Transport and catabolism	04144 Endocytosis
Cluster_22911	K01115	Cellular Processes	Transport and catabolism	04144 Endocytosis
Cluster_22929	K03283	Cellular Processes	Transport and catabolism	04144 Endocytosis
Cluster_23013	K12486	Cellular Processes	Transport and catabolism	04144 Endocytosis
Cluster_23077	K00889	Cellular Processes	Transport and catabolism	04144 Endocytosis
Cluster_233	"K05349,K14309,K07466,K02183,K01115,K13414,K16225,K03283,K16911,K08852,K16226"	Cellular Processes	Transport and catabolism	04144 Endocytosis
Cluster_2330	"K12196,K03231"	Cellular Processes	Transport and catabolism	04144 Endocytosis
Cluster_23318	K07901	Cellular Processes	Transport and catabolism	04144 Endocytosis
Cluster_23415	"K03283,K04043"	Cellular Processes	Transport and catabolism	04144 Endocytosis
Cluster_23469	"K07887,K07889"	Cellular Processes	Transport and catabolism	04144 Endocytosis
Cluster_2359	K12472	Cellular Processes	Transport and catabolism	04144 Endocytosis
Cluster_23611	K12486	Cellular Processes	Transport and catabolism	04144 Endocytosis
Cluster_23718	K07901	Cellular Processes	Transport and catabolism	04144 Endocytosis
Cluster_23721	"K07901,K00889"	Cellular Processes	Transport and catabolism	04144 Endocytosis
Cluster_23768	"K04646,K01115,K13414,K03283,K16911,K16226,K08852,K05349,K14309,K07466,K02183"	Cellular Processes	Transport and catabolism	04144 Endocytosis
Cluster_2384	"K02957,K19476"	Cellular Processes	Transport and catabolism	04144 Endocytosis
Cluster_24111	K07937	Cellular Processes	Transport and catabolism	04144 Endocytosis
Cluster_24254	K03283	Cellular Processes	Transport and catabolism	04144 Endocytosis
Cluster_24394	"K02183,K07466,K14309,K05349,K16911,K16226,K08852,K16225,K03283,K13414,K01115"	Cellular Processes	Transport and catabolism	04144 Endocytosis
Cluster_24413	K11866	Cellular Processes	Transport and catabolism	04144 Endocytosis
Cluster_24428	K07901	Cellular Processes	Transport and catabolism	04144 Endocytosis
Cluster_245	"K11839,K14011"	Cellular Processes	Transport and catabolism	04144 Endocytosis
Cluster_2460	K19476	Cellular Processes	Transport and catabolism	04144 Endocytosis
Cluster_24654	K12191	Cellular Processes	Transport and catabolism	04144 Endocytosis
Cluster_24660	K11826	Cellular Processes	Transport and catabolism	04144 Endocytosis
Cluster_2472	"K13457,K14309,K13459,K16911,K16226,K08852,K03283,K16225"	Cellular Processes	Transport and catabolism	04144 Endocytosis
Cluster_24756	"K08852,K16226,K13414,K03283,K07466,K02183,K05349,K13448,K14309"	Cellular Processes	Transport and catabolism	04144 Endocytosis
Cluster_24774	K12486	Cellular Processes	Transport and catabolism	04144 Endocytosis
Cluster_24806	K00889	Cellular Processes	Transport and catabolism	04144 Endocytosis
Cluster_24810	"K18443,K09490"	Cellular Processes	Transport and catabolism	04144 Endocytosis
Cluster_24823	K04646	Cellular Processes	Transport and catabolism	04144 Endocytosis
Cluster_2485	"K11825,K11824"	Cellular Processes	Transport and catabolism	04144 Endocytosis
Cluster_24878	K12486	Cellular Processes	Transport and catabolism	04144 Endocytosis
Cluster_24918	K07904	Cellular Processes	Transport and catabolism	04144 Endocytosis
Cluster_24987	K07904	Cellular Processes	Transport and catabolism	04144 Endocytosis
Cluster_250	"K13414,K12897,K04368,K04688,K07198,K06276,K12489"	Cellular Processes	Transport and catabolism	04144 Endocytosis
Cluster_25027	"K17917,K07562,K01595,K02910"	Cellular Processes	Transport and catabolism	04144 Endocytosis
Cluster_25041	K01115	Cellular Processes	Transport and catabolism	04144 Endocytosis
Cluster_25058	K19476	Cellular Processes	Transport and catabolism	04144 Endocytosis
Cluster_25071	K17917	Cellular Processes	Transport and catabolism	04144 Endocytosis
Cluster_25093	K12472	Cellular Processes	Transport and catabolism	04144 Endocytosis
Cluster_25152	K07889	Cellular Processes	Transport and catabolism	04144 Endocytosis
Cluster_25170	"K13459,K16911,K08852,K16226,K03283,K16225,K13457,K00514,K14309"	Cellular Processes	Transport and catabolism	04144 Endocytosis
Cluster_2530	"K18443,K11262"	Cellular Processes	Transport and catabolism	04144 Endocytosis
Cluster_2535	K01115	Cellular Processes	Transport and catabolism	04144 Endocytosis
Cluster_25387	"K01183,K13430,K13436,K13416,K03283"	Cellular Processes	Transport and catabolism	04144 Endocytosis
Cluster_25418	K07901	Cellular Processes	Transport and catabolism	04144 Endocytosis
Cluster_25447	"K14309,K05349,K02183,K07466,K16225,K03283,K13414,K01115,K08852,K16226"	Cellular Processes	Transport and catabolism	04144 Endocytosis
Cluster_25559	K12472	Cellular Processes	Transport and catabolism	04144 Endocytosis
Cluster_25656	K07904	Cellular Processes	Transport and catabolism	04144 Endocytosis
Cluster_2574	K00889	Cellular Processes	Transport and catabolism	04144 Endocytosis
Cluster_258	"K18443,K18442"	Cellular Processes	Transport and catabolism	04144 Endocytosis
Cluster_25871	"K13430,K01183,K13417,K13416,K03283"	Cellular Processes	Transport and catabolism	04144 Endocytosis
Cluster_25917	K01115	Cellular Processes	Transport and catabolism	04144 Endocytosis
Cluster_25925	K12489	Cellular Processes	Transport and catabolism	04144 Endocytosis
Cluster_25931	K18468	Cellular Processes	Transport and catabolism	04144 Endocytosis
Cluster_25938	K03283	Cellular Processes	Transport and catabolism	04144 Endocytosis
Cluster_262	"K17982,K07466,K01251,K08081,K04079,K15402,K08503,K12616,K14497,K03243,K12489,K05391"	Cellular Processes	Transport and catabolism	04144 Endocytosis
Cluster_26498	K17917	Cellular Processes	Transport and catabolism	04144 Endocytosis
Cluster_26534	K10396	Cellular Processes	Transport and catabolism	04144 Endocytosis
Cluster_26552	K05756	Cellular Processes	Transport and catabolism	04144 Endocytosis
Cluster_2659	K12472	Cellular Processes	Transport and catabolism	04144 Endocytosis
Cluster_2664	"K08081,K01251,K07466,K05391,K12489,K12616,K14497"	Cellular Processes	Transport and catabolism	04144 Endocytosis
Cluster_26642	K07904	Cellular Processes	Transport and catabolism	04144 Endocytosis
Cluster_26714	K12489	Cellular Processes	Transport and catabolism	04144 Endocytosis
Cluster_26727	"K03283,K13430,K01183"	Cellular Processes	Transport and catabolism	04144 Endocytosis
Cluster_26738	K07937	Cellular Processes	Transport and catabolism	04144 Endocytosis
Cluster_26802	K07889	Cellular Processes	Transport and catabolism	04144 Endocytosis
Cluster_2695	K18443	Cellular Processes	Transport and catabolism	04144 Endocytosis
Cluster_27031	K11826	Cellular Processes	Transport and catabolism	04144 Endocytosis
Cluster_2705	"K10396,K14565"	Cellular Processes	Transport and catabolism	04144 Endocytosis
Cluster_27073	"K13430,K01183,K03283,K13416,K13436"	Cellular Processes	Transport and catabolism	04144 Endocytosis
Cluster_2711	K12196	Cellular Processes	Transport and catabolism	04144 Endocytosis
Cluster_27211	"K07901,K00889"	Cellular Processes	Transport and catabolism	04144 Endocytosis
Cluster_27266	"K12192,K12191"	Cellular Processes	Transport and catabolism	04144 Endocytosis
Cluster_27404	"K16225,K03283,K08852"	Cellular Processes	Transport and catabolism	04144 Endocytosis
Cluster_27815	"K05349,K14309,K07466,K02183,K13414,K01115,K03283,K16225,K16911,K16226,K08852"	Cellular Processes	Transport and catabolism	04144 Endocytosis
Cluster_2793	K00889	Cellular Processes	Transport and catabolism	04144 Endocytosis
Cluster_28036	K10365	Cellular Processes	Transport and catabolism	04144 Endocytosis
Cluster_28096	"K12192,K12191"	Cellular Processes	Transport and catabolism	04144 Endocytosis
Cluster_28121	K05755	Cellular Processes	Transport and catabolism	04144 Endocytosis
Cluster_28178	K12486	Cellular Processes	Transport and catabolism	04144 Endocytosis
Cluster_28212	K12193	Cellular Processes	Transport and catabolism	04144 Endocytosis
Cluster_28235	"K08852,K03283,K02183,K14309"	Cellular Processes	Transport and catabolism	04144 Endocytosis
Cluster_28255	K00889	Cellular Processes	Transport and catabolism	04144 Endocytosis
Cluster_2829	K01528	Cellular Processes	Transport and catabolism	04144 Endocytosis
Cluster_28305	"K04043,K03283"	Cellular Processes	Transport and catabolism	04144 Endocytosis
Cluster_2839	"K13415,K12489,K13416"	Cellular Processes	Transport and catabolism	04144 Endocytosis
Cluster_28456	K07901	Cellular Processes	Transport and catabolism	04144 Endocytosis
Cluster_2851	K11824	Cellular Processes	Transport and catabolism	04144 Endocytosis
Cluster_28525	K07904	Cellular Processes	Transport and catabolism	04144 Endocytosis
Cluster_28534	K12198	Cellular Processes	Transport and catabolism	04144 Endocytosis
Cluster_28544	"K12472,K14297"	Cellular Processes	Transport and catabolism	04144 Endocytosis
Cluster_28569	K07889	Cellular Processes	Transport and catabolism	04144 Endocytosis
Cluster_28572	K12471	Cellular Processes	Transport and catabolism	04144 Endocytosis
Cluster_2859	K12486	Cellular Processes	Transport and catabolism	04144 Endocytosis
Cluster_2864	"K03231,K12196"	Cellular Processes	Transport and catabolism	04144 Endocytosis
Cluster_2870	K18443	Cellular Processes	Transport and catabolism	04144 Endocytosis
Cluster_28959	"K03231,K14571,K03061,K12196,K13525"	Cellular Processes	Transport and catabolism	04144 Endocytosis
Cluster_2902	"K17982,K03243,K12616,K14497,K05391,K12489,K01251,K07466,K04079,K08081"	Cellular Processes	Transport and catabolism	04144 Endocytosis
Cluster_29020	"K00847,K12200"	Cellular Processes	Transport and catabolism	04144 Endocytosis
Cluster_29085	K12486	Cellular Processes	Transport and catabolism	04144 Endocytosis
Cluster_29090	K12194	Cellular Processes	Transport and catabolism	04144 Endocytosis
Cluster_2918	K12479	Cellular Processes	Transport and catabolism	04144 Endocytosis
Cluster_29347	"K07905,K07904"	Cellular Processes	Transport and catabolism	04144 Endocytosis
Cluster_295	"K17982,K00006,K08503,K08081,K04079,K01251,K07466,K12489,K05391,K03243,K14497,K12616"	Cellular Processes	Transport and catabolism	04144 Endocytosis
Cluster_2956	"K14309,K05349,K02183,K13457,K07466,K03283,K16225,K13414,K01115,K08852,K16226,K16911"	Cellular Processes	Transport and catabolism	04144 Endocytosis
Cluster_29669	K19476	Cellular Processes	Transport and catabolism	04144 Endocytosis
Cluster_29704	K12492	Cellular Processes	Transport and catabolism	04144 Endocytosis
Cluster_2973	K12184	Cellular Processes	Transport and catabolism	04144 Endocytosis
Cluster_2992	"K10396,K01206,K10960,K00679"	Cellular Processes	Transport and catabolism	04144 Endocytosis
Cluster_301	"K00799,K02350,K01876,K00627,K12619,K07374,K14760,K01188,K03283,K01623,K12882,K04077,K03644,K14539,K07198,K13420,K01191,K05658"	Cellular Processes	Transport and catabolism	04144 Endocytosis
Cluster_30142	K07937	Cellular Processes	Transport and catabolism	04144 Endocytosis
Cluster_30166	K11826	Cellular Processes	Transport and catabolism	04144 Endocytosis
Cluster_30337	"K16226,K08852,K03283,K13414,K01115,K02183,K07466,K14309,K05349"	Cellular Processes	Transport and catabolism	04144 Endocytosis
Cluster_30406	K03283	Cellular Processes	Transport and catabolism	04144 Endocytosis
Cluster_305	"K12472,K10866,K09291"	Cellular Processes	Transport and catabolism	04144 Endocytosis
Cluster_3062	K01528	Cellular Processes	Transport and catabolism	04144 Endocytosis
Cluster_3065	"K02183,K07466,K14309,K05349,K16226,K08852,K16225,K03283,K13414,K01115"	Cellular Processes	Transport and catabolism	04144 Endocytosis
Cluster_30718	"K07904,K07901"	Cellular Processes	Transport and catabolism	04144 Endocytosis
Cluster_30837	K12486	Cellular Processes	Transport and catabolism	04144 Endocytosis
Cluster_3104	K12472	Cellular Processes	Transport and catabolism	04144 Endocytosis
Cluster_31099	K18443	Cellular Processes	Transport and catabolism	04144 Endocytosis
Cluster_311	"K01456,K04077,K14539,K12882,K13420,K13428,K12741,K07198,K05658,K02350,K00627,K01738,K12619,K03283,K01623,K07374,K04392"	Cellular Processes	Transport and catabolism	04144 Endocytosis
Cluster_3110	"K08852,K13459,K03283,K16225"	Cellular Processes	Transport and catabolism	04144 Endocytosis
Cluster_3114	K19476	Cellular Processes	Transport and catabolism	04144 Endocytosis
Cluster_31163	K18442	Cellular Processes	Transport and catabolism	04144 Endocytosis
Cluster_31186	K19476	Cellular Processes	Transport and catabolism	04144 Endocytosis
Cluster_3120	"K01206,K12885,K10396,K00679,K10960,K00514"	Cellular Processes	Transport and catabolism	04144 Endocytosis
Cluster_31246	K05757	Cellular Processes	Transport and catabolism	04144 Endocytosis
Cluster_31283	"K13430,K01183,K13417,K18873,K13436,K03283,K13416"	Cellular Processes	Transport and catabolism	04144 Endocytosis
Cluster_3136	K18468	Cellular Processes	Transport and catabolism	04144 Endocytosis
Cluster_3158	"K12819,K01738,K03062,K05756,K00566,K05605,K16196"	Cellular Processes	Transport and catabolism	04144 Endocytosis
Cluster_316	K19476	Cellular Processes	Transport and catabolism	04144 Endocytosis
Cluster_3173	"K14565,K10396"	Cellular Processes	Transport and catabolism	04144 Endocytosis
Cluster_31739	K12486	Cellular Processes	Transport and catabolism	04144 Endocytosis
Cluster_31966	K07904	Cellular Processes	Transport and catabolism	04144 Endocytosis
Cluster_31973	"K04706,K03283,K16225,K08852"	Cellular Processes	Transport and catabolism	04144 Endocytosis
Cluster_31995	K12195	Cellular Processes	Transport and catabolism	04144 Endocytosis
Cluster_32128	K07937	Cellular Processes	Transport and catabolism	04144 Endocytosis
Cluster_32268	K01528	Cellular Processes	Transport and catabolism	04144 Endocytosis
Cluster_323	"K14760,K07374,K17982,K03283,K01623,K02328,K01876,K03136,K05658,K05356,K05290,K01006,K12882,K00559,K13420"	Cellular Processes	Transport and catabolism	04144 Endocytosis
Cluster_32357	K12486	Cellular Processes	Transport and catabolism	04144 Endocytosis
Cluster_32368	K19366	Cellular Processes	Transport and catabolism	04144 Endocytosis
Cluster_325	K18443	Cellular Processes	Transport and catabolism	04144 Endocytosis
Cluster_3250	K03283	Cellular Processes	Transport and catabolism	04144 Endocytosis
Cluster_3255	K01528	Cellular Processes	Transport and catabolism	04144 Endocytosis
Cluster_32859	K03283	Cellular Processes	Transport and catabolism	04144 Endocytosis
Cluster_32922	K01115	Cellular Processes	Transport and catabolism	04144 Endocytosis
Cluster_32927	"K12486,K13421"	Cellular Processes	Transport and catabolism	04144 Endocytosis
Cluster_33042	K11826	Cellular Processes	Transport and catabolism	04144 Endocytosis
Cluster_33172	"K13339,K13525,K03231,K12196"	Cellular Processes	Transport and catabolism	04144 Endocytosis
Cluster_33220	"K04077,K13420,K00430,K12741,K05658,K02350,K13811,K01209,K12619,K12604,K03283,K01623,K13648,K17982"	Cellular Processes	Transport and catabolism	04144 Endocytosis
Cluster_33335	K07901	Cellular Processes	Transport and catabolism	04144 Endocytosis
Cluster_3351	"K17917,K07562,K01595"	Cellular Processes	Transport and catabolism	04144 Endocytosis
Cluster_33548	"K13421,K12486"	Cellular Processes	Transport and catabolism	04144 Endocytosis
Cluster_33704	K11827	Cellular Processes	Transport and catabolism	04144 Endocytosis
Cluster_33988	K07904	Cellular Processes	Transport and catabolism	04144 Endocytosis
Cluster_3420	"K18443,K11262"	Cellular Processes	Transport and catabolism	04144 Endocytosis
Cluster_3423	"K08852,K13459,K03283,K16225"	Cellular Processes	Transport and catabolism	04144 Endocytosis
Cluster_34248	K11827	Cellular Processes	Transport and catabolism	04144 Endocytosis
Cluster_34272	"K01183,K13420,K13430,K13436,K03283"	Cellular Processes	Transport and catabolism	04144 Endocytosis
Cluster_34401	K18468	Cellular Processes	Transport and catabolism	04144 Endocytosis
Cluster_34678	K17917	Cellular Processes	Transport and catabolism	04144 Endocytosis
Cluster_34751	K11827	Cellular Processes	Transport and catabolism	04144 Endocytosis
Cluster_34851	"K11839,K12847,K12493"	Cellular Processes	Transport and catabolism	04144 Endocytosis
Cluster_34971	K17917	Cellular Processes	Transport and catabolism	04144 Endocytosis
Cluster_35001	K07937	Cellular Processes	Transport and catabolism	04144 Endocytosis
Cluster_35004	"K08852,K16226,K13414,K04646,K01115,K03283,K07466,K02183,K05349,K14309"	Cellular Processes	Transport and catabolism	04144 Endocytosis
Cluster_3503	"K07198,K01456,K14400,K14416,K01191,K05658,K13436,K02350,K03283,K12619"	Cellular Processes	Transport and catabolism	04144 Endocytosis
Cluster_3511	"K09291,K12472"	Cellular Processes	Transport and catabolism	04144 Endocytosis
Cluster_35303	K04646	Cellular Processes	Transport and catabolism	04144 Endocytosis
Cluster_35351	K03283	Cellular Processes	Transport and catabolism	04144 Endocytosis
Cluster_35441	K12486	Cellular Processes	Transport and catabolism	04144 Endocytosis
Cluster_35491	K07904	Cellular Processes	Transport and catabolism	04144 Endocytosis
Cluster_35650	K12198	Cellular Processes	Transport and catabolism	04144 Endocytosis
Cluster_35696	K12191	Cellular Processes	Transport and catabolism	04144 Endocytosis
Cluster_358	K05755	Cellular Processes	Transport and catabolism	04144 Endocytosis
Cluster_35858	K03283	Cellular Processes	Transport and catabolism	04144 Endocytosis
Cluster_35940	K04646	Cellular Processes	Transport and catabolism	04144 Endocytosis
Cluster_35987	K05747	Cellular Processes	Transport and catabolism	04144 Endocytosis
Cluster_36110	K01115	Cellular Processes	Transport and catabolism	04144 Endocytosis
Cluster_36135	K12489	Cellular Processes	Transport and catabolism	04144 Endocytosis
Cluster_3619	K01528	Cellular Processes	Transport and catabolism	04144 Endocytosis
Cluster_36247	K17917	Cellular Processes	Transport and catabolism	04144 Endocytosis
Cluster_36387	K12200	Cellular Processes	Transport and catabolism	04144 Endocytosis
Cluster_3648	"K03283,K09490"	Cellular Processes	Transport and catabolism	04144 Endocytosis
Cluster_3668	"K18443,K09490"	Cellular Processes	Transport and catabolism	04144 Endocytosis
Cluster_3670	"K12196,K03231,K13525"	Cellular Processes	Transport and catabolism	04144 Endocytosis
Cluster_36803	"K08852,K16911,K16225,K03283,K13414,K01115,K02183,K07466,K14309,K05349"	Cellular Processes	Transport and catabolism	04144 Endocytosis
Cluster_36850	K01115	Cellular Processes	Transport and catabolism	04144 Endocytosis
Cluster_36902	"K04043,K03283"	Cellular Processes	Transport and catabolism	04144 Endocytosis
Cluster_3693	"K12472,K09291"	Cellular Processes	Transport and catabolism	04144 Endocytosis
Cluster_3698	"K14565,K10396"	Cellular Processes	Transport and catabolism	04144 Endocytosis
Cluster_36999	K12486	Cellular Processes	Transport and catabolism	04144 Endocytosis
Cluster_370	K07937	Cellular Processes	Transport and catabolism	04144 Endocytosis
Cluster_37026	K12493	Cellular Processes	Transport and catabolism	04144 Endocytosis
Cluster_371	"K14306,K12472"	Cellular Processes	Transport and catabolism	04144 Endocytosis
Cluster_37104	"K04043,K03283"	Cellular Processes	Transport and catabolism	04144 Endocytosis
Cluster_37228	K07904	Cellular Processes	Transport and catabolism	04144 Endocytosis
Cluster_37265	"K13457,K07466,K02183,K05349,K14309,K16226,K08852,K16911,K13414,K01115,K04646,K03283"	Cellular Processes	Transport and catabolism	04144 Endocytosis
Cluster_37384	K07897	Cellular Processes	Transport and catabolism	04144 Endocytosis
Cluster_3758	"K05349,K14309,K07466,K02183,K01115,K04646,K03283,K16225,K16226,K08852,K16911"	Cellular Processes	Transport and catabolism	04144 Endocytosis
Cluster_37587	"K16911,K08852,K16226,K03283,K16225,K14309"	Cellular Processes	Transport and catabolism	04144 Endocytosis
Cluster_37881	"K09490,K03283"	Cellular Processes	Transport and catabolism	04144 Endocytosis
Cluster_37886	K18467	Cellular Processes	Transport and catabolism	04144 Endocytosis
Cluster_37897	K03283	Cellular Processes	Transport and catabolism	04144 Endocytosis
Cluster_37903	K12486	Cellular Processes	Transport and catabolism	04144 Endocytosis
Cluster_38051	"K08852,K16226,K01115,K04646,K13414,K03283,K07466,K02183,K05349,K14309"	Cellular Processes	Transport and catabolism	04144 Endocytosis
Cluster_38121	K11827	Cellular Processes	Transport and catabolism	04144 Endocytosis
Cluster_38198	"K03283,K04646,K01115,K13414,K08852,K16226,K14309,K02183,K07466"	Cellular Processes	Transport and catabolism	04144 Endocytosis
Cluster_3822	K18468	Cellular Processes	Transport and catabolism	04144 Endocytosis
Cluster_38223	K01115	Cellular Processes	Transport and catabolism	04144 Endocytosis
Cluster_38292	K12492	Cellular Processes	Transport and catabolism	04144 Endocytosis
Cluster_3833	K19476	Cellular Processes	Transport and catabolism	04144 Endocytosis
Cluster_38493	"K04706,K16225,K03283,K08852,K16226,K16911,K13459"	Cellular Processes	Transport and catabolism	04144 Endocytosis
Cluster_38643	K07937	Cellular Processes	Transport and catabolism	04144 Endocytosis
Cluster_38683	"K03283,K04043"	Cellular Processes	Transport and catabolism	04144 Endocytosis
Cluster_38948	K12492	Cellular Processes	Transport and catabolism	04144 Endocytosis
Cluster_3904	"K12897,K13412,K12489,K02183"	Cellular Processes	Transport and catabolism	04144 Endocytosis
Cluster_391	"K05756,K00566,K01738,K12819,K13457,K13356,K10599,K05666,K16196,K05605,K01191,K15086"	Cellular Processes	Transport and catabolism	04144 Endocytosis
Cluster_39157	K12197	Cellular Processes	Transport and catabolism	04144 Endocytosis
Cluster_39268	K07904	Cellular Processes	Transport and catabolism	04144 Endocytosis
Cluster_39391	K12489	Cellular Processes	Transport and catabolism	04144 Endocytosis
Cluster_3954	"K18443,K09490,K11262"	Cellular Processes	Transport and catabolism	04144 Endocytosis
Cluster_39627	K18443	Cellular Processes	Transport and catabolism	04144 Endocytosis
Cluster_39731	K07901	Cellular Processes	Transport and catabolism	04144 Endocytosis
Cluster_39765	K12471	Cellular Processes	Transport and catabolism	04144 Endocytosis
Cluster_3981	"K12472,K09291,K03254"	Cellular Processes	Transport and catabolism	04144 Endocytosis
Cluster_4026	"K01115,K14317"	Cellular Processes	Transport and catabolism	04144 Endocytosis
Cluster_40352	K12471	Cellular Processes	Transport and catabolism	04144 Endocytosis
Cluster_4042	"K08852,K16226,K13414,K01115,K03283,K16225,K07466,K02183,K05349,K14309"	Cellular Processes	Transport and catabolism	04144 Endocytosis
Cluster_40468	K12492	Cellular Processes	Transport and catabolism	04144 Endocytosis
Cluster_40614	K12486	Cellular Processes	Transport and catabolism	04144 Endocytosis
Cluster_40710	K00889	Cellular Processes	Transport and catabolism	04144 Endocytosis
Cluster_4079	"K12472,K09291"	Cellular Processes	Transport and catabolism	04144 Endocytosis
Cluster_40916	"K12472,K09291"	Cellular Processes	Transport and catabolism	04144 Endocytosis
Cluster_41	"K15086,K01191,K05605,K16196,K05666,K10599,K13457,K13356,K12819,K01738,K14513,K00566,K12153,K05756"	Cellular Processes	Transport and catabolism	04144 Endocytosis
Cluster_4115	K12471	Cellular Processes	Transport and catabolism	04144 Endocytosis
Cluster_4118	"K10396,K08332,K12585,K00276"	Cellular Processes	Transport and catabolism	04144 Endocytosis
Cluster_41366	"K04706,K08852,K16226,K16225,K03283"	Cellular Processes	Transport and catabolism	04144 Endocytosis
Cluster_41380	"K07889,K07904"	Cellular Processes	Transport and catabolism	04144 Endocytosis
Cluster_41422	K12191	Cellular Processes	Transport and catabolism	04144 Endocytosis
Cluster_41670	"K04043,K03283"	Cellular Processes	Transport and catabolism	04144 Endocytosis
Cluster_41850	"K07901,K00889,K07904"	Cellular Processes	Transport and catabolism	04144 Endocytosis
Cluster_4191	"K05349,K14309,K07466,K02183,K13414,K01115,K03283,K08852,K16226"	Cellular Processes	Transport and catabolism	04144 Endocytosis
Cluster_42018	K07937	Cellular Processes	Transport and catabolism	04144 Endocytosis
Cluster_42064	K12197	Cellular Processes	Transport and catabolism	04144 Endocytosis
Cluster_42155	"K08852,K16226,K03283,K13414,K04646,K01115,K02183,K07466,K14309"	Cellular Processes	Transport and catabolism	04144 Endocytosis
Cluster_42222	"K09291,K12472"	Cellular Processes	Transport and catabolism	04144 Endocytosis
Cluster_4231	K00889	Cellular Processes	Transport and catabolism	04144 Endocytosis
Cluster_42356	K19366	Cellular Processes	Transport and catabolism	04144 Endocytosis
Cluster_4243	"K14565,K10396"	Cellular Processes	Transport and catabolism	04144 Endocytosis
Cluster_42744	K12184	Cellular Processes	Transport and catabolism	04144 Endocytosis
Cluster_428	"K02183,K07466,K14309,K05349,K08852,K16226,K16911,K03283,K16225,K01115,K13414"	Cellular Processes	Transport and catabolism	04144 Endocytosis
Cluster_429	"K00559,K01456,K12882,K14539,K04077,K13428,K13420,K07198,K12741,K05658,K14416,K03136,K01006,K14400,K02350,K01876,K01209,K12619,K03283,K01623,K07374,K04392,K17982"	Cellular Processes	Transport and catabolism	04144 Endocytosis
Cluster_42966	K01115	Cellular Processes	Transport and catabolism	04144 Endocytosis
Cluster_42981	K12471	Cellular Processes	Transport and catabolism	04144 Endocytosis
Cluster_4308	"K18443,K09490"	Cellular Processes	Transport and catabolism	04144 Endocytosis
Cluster_43097	"K13415,K12489"	Cellular Processes	Transport and catabolism	04144 Endocytosis
Cluster_4310	K12190	Cellular Processes	Transport and catabolism	04144 Endocytosis
Cluster_4313	K18443	Cellular Processes	Transport and catabolism	04144 Endocytosis
Cluster_4371	K12471	Cellular Processes	Transport and catabolism	04144 Endocytosis
Cluster_4373	"K10866,K09291,K12472"	Cellular Processes	Transport and catabolism	04144 Endocytosis
Cluster_43735	"K03283,K04043"	Cellular Processes	Transport and catabolism	04144 Endocytosis
Cluster_43929	"K08852,K03283,K16225"	Cellular Processes	Transport and catabolism	04144 Endocytosis
Cluster_43970	K12194	Cellular Processes	Transport and catabolism	04144 Endocytosis
Cluster_44031	K12183	Cellular Processes	Transport and catabolism	04144 Endocytosis
Cluster_44032	K05754	Cellular Processes	Transport and catabolism	04144 Endocytosis
Cluster_4406	"K11839,K12493"	Cellular Processes	Transport and catabolism	04144 Endocytosis
Cluster_44107	"K16225,K03283,K16911,K08852,K16226,K14309"	Cellular Processes	Transport and catabolism	04144 Endocytosis
Cluster_4415	K03283	Cellular Processes	Transport and catabolism	04144 Endocytosis
Cluster_44219	K12198	Cellular Processes	Transport and catabolism	04144 Endocytosis
Cluster_44382	K01528	Cellular Processes	Transport and catabolism	04144 Endocytosis
Cluster_44395	K07904	Cellular Processes	Transport and catabolism	04144 Endocytosis
Cluster_44567	K12486	Cellular Processes	Transport and catabolism	04144 Endocytosis
Cluster_4486	K12479	Cellular Processes	Transport and catabolism	04144 Endocytosis
Cluster_4525	K12471	Cellular Processes	Transport and catabolism	04144 Endocytosis
Cluster_45443	"K00928,K12489"	Cellular Processes	Transport and catabolism	04144 Endocytosis
Cluster_4554	"K03283,K09490,K09486"	Cellular Processes	Transport and catabolism	04144 Endocytosis
Cluster_4564	K07937	Cellular Processes	Transport and catabolism	04144 Endocytosis
Cluster_45736	K07937	Cellular Processes	Transport and catabolism	04144 Endocytosis
Cluster_45793	"K12472,K09291"	Cellular Processes	Transport and catabolism	04144 Endocytosis
Cluster_45799	K18467	Cellular Processes	Transport and catabolism	04144 Endocytosis
Cluster_45881	K07937	Cellular Processes	Transport and catabolism	04144 Endocytosis
Cluster_46222	K10396	Cellular Processes	Transport and catabolism	04144 Endocytosis
Cluster_46248	K18467	Cellular Processes	Transport and catabolism	04144 Endocytosis
Cluster_46263	K10364	Cellular Processes	Transport and catabolism	04144 Endocytosis
Cluster_4628	K12486	Cellular Processes	Transport and catabolism	04144 Endocytosis
Cluster_465	"K05391,K12489,K12616,K14497,K03243,K16196,K08081,K04079,K00815,K08503,K00889,K07466,K17982,K01915"	Cellular Processes	Transport and catabolism	04144 Endocytosis
Cluster_46659	K07937	Cellular Processes	Transport and catabolism	04144 Endocytosis
Cluster_46729	"K07562,K17917"	Cellular Processes	Transport and catabolism	04144 Endocytosis
Cluster_4711	"K09291,K12472"	Cellular Processes	Transport and catabolism	04144 Endocytosis
Cluster_4716	"K05747,K12602"	Cellular Processes	Transport and catabolism	04144 Endocytosis
Cluster_47254	K12492	Cellular Processes	Transport and catabolism	04144 Endocytosis
Cluster_47806	K12191	Cellular Processes	Transport and catabolism	04144 Endocytosis
Cluster_47830	K07904	Cellular Processes	Transport and catabolism	04144 Endocytosis
Cluster_47962	"K04043,K03283"	Cellular Processes	Transport and catabolism	04144 Endocytosis
Cluster_48019	"K13525,K12196,K03231,K14575"	Cellular Processes	Transport and catabolism	04144 Endocytosis
Cluster_4806	"K02183,K05349,K14309,K16911,K16226,K08852,K13414,K04646,K01115,K03283"	Cellular Processes	Transport and catabolism	04144 Endocytosis
Cluster_48476	K12197	Cellular Processes	Transport and catabolism	04144 Endocytosis
Cluster_48697	K00889	Cellular Processes	Transport and catabolism	04144 Endocytosis
Cluster_48699	K01115	Cellular Processes	Transport and catabolism	04144 Endocytosis
Cluster_48867	"K07901,K00889"	Cellular Processes	Transport and catabolism	04144 Endocytosis
Cluster_48903	K01528	Cellular Processes	Transport and catabolism	04144 Endocytosis
Cluster_48905	K18442	Cellular Processes	Transport and catabolism	04144 Endocytosis
Cluster_48985	"K03283,K04043"	Cellular Processes	Transport and catabolism	04144 Endocytosis
Cluster_49045	"K08852,K16226,K04646,K01115,K13414,K03283,K07466,K02183,K05349,K14309"	Cellular Processes	Transport and catabolism	04144 Endocytosis
Cluster_49118	K07937	Cellular Processes	Transport and catabolism	04144 Endocytosis
Cluster_4922	K18442	Cellular Processes	Transport and catabolism	04144 Endocytosis
Cluster_49318	K18468	Cellular Processes	Transport and catabolism	04144 Endocytosis
Cluster_496	"K14515,K12188,K17605"	Cellular Processes	Transport and catabolism	04144 Endocytosis
Cluster_49653	"K10396,K01206,K00514,K00679"	Cellular Processes	Transport and catabolism	04144 Endocytosis
Cluster_49697	"K12875,K14317,K00430,K01183,K05747,K03006,K01051"	Cellular Processes	Transport and catabolism	04144 Endocytosis
Cluster_497	"K14536,K03283"	Cellular Processes	Transport and catabolism	04144 Endocytosis
Cluster_49882	K12471	Cellular Processes	Transport and catabolism	04144 Endocytosis
Cluster_49941	K12486	Cellular Processes	Transport and catabolism	04144 Endocytosis
Cluster_5003	"K07466,K02183,K05349,K14309,K08852,K16226,K13414,K01115,K03283"	Cellular Processes	Transport and catabolism	04144 Endocytosis
Cluster_50065	K07937	Cellular Processes	Transport and catabolism	04144 Endocytosis
Cluster_50085	K07901	Cellular Processes	Transport and catabolism	04144 Endocytosis
Cluster_50086	K10396	Cellular Processes	Transport and catabolism	04144 Endocytosis
Cluster_5030	"K03283,K01115,K04646,K13414,K16226,K08852,K14309,K05349,K02183,K07466"	Cellular Processes	Transport and catabolism	04144 Endocytosis
Cluster_5037	"K12875,K14559,K03243,K02320,K12472"	Cellular Processes	Transport and catabolism	04144 Endocytosis
Cluster_50769	K07901	Cellular Processes	Transport and catabolism	04144 Endocytosis
Cluster_50879	K01528	Cellular Processes	Transport and catabolism	04144 Endocytosis
Cluster_51006	K12486	Cellular Processes	Transport and catabolism	04144 Endocytosis
Cluster_5127	K07904	Cellular Processes	Transport and catabolism	04144 Endocytosis
Cluster_5139	"K13436,K13459,K13415,K12489"	Cellular Processes	Transport and catabolism	04144 Endocytosis
Cluster_5140	K03283	Cellular Processes	Transport and catabolism	04144 Endocytosis
Cluster_51713	"K03283,K13416,K13417,K01183"	Cellular Processes	Transport and catabolism	04144 Endocytosis
Cluster_51919	K12492	Cellular Processes	Transport and catabolism	04144 Endocytosis
Cluster_51991	K01528	Cellular Processes	Transport and catabolism	04144 Endocytosis
Cluster_5208	"K03243,K12472,K02320,K12875,K14559"	Cellular Processes	Transport and catabolism	04144 Endocytosis
Cluster_524	K19476	Cellular Processes	Transport and catabolism	04144 Endocytosis
Cluster_5255	"K12196,K03231"	Cellular Processes	Transport and catabolism	04144 Endocytosis
Cluster_52657	K07901	Cellular Processes	Transport and catabolism	04144 Endocytosis
Cluster_52727	K01528	Cellular Processes	Transport and catabolism	04144 Endocytosis
Cluster_52756	K05747	Cellular Processes	Transport and catabolism	04144 Endocytosis
Cluster_52931	K18443	Cellular Processes	Transport and catabolism	04144 Endocytosis
Cluster_530	"K02350,K04564,K12619,K07374,K17982,K03283,K01623,K14489,K14539,K04077,K12882,K00559,K01456,K12741,K07198,K13420,K13428,K03136,K01191,K05658,K00654,K02993,K05290,K01006"	Cellular Processes	Transport and catabolism	04144 Endocytosis
Cluster_53037	K07897	Cellular Processes	Transport and catabolism	04144 Endocytosis
Cluster_53107	K03283	Cellular Processes	Transport and catabolism	04144 Endocytosis
Cluster_53544	K18466	Cellular Processes	Transport and catabolism	04144 Endocytosis
Cluster_53716	K12471	Cellular Processes	Transport and catabolism	04144 Endocytosis
Cluster_53747	"K03283,K08852,K16911"	Cellular Processes	Transport and catabolism	04144 Endocytosis
Cluster_53963	"K03283,K04043"	Cellular Processes	Transport and catabolism	04144 Endocytosis
Cluster_5404	K03283	Cellular Processes	Transport and catabolism	04144 Endocytosis
Cluster_5420	K12471	Cellular Processes	Transport and catabolism	04144 Endocytosis
Cluster_5455	K12492	Cellular Processes	Transport and catabolism	04144 Endocytosis
Cluster_54622	K01528	Cellular Processes	Transport and catabolism	04144 Endocytosis
Cluster_5465	"K00679,K10960,K00514,K01206,K10396"	Cellular Processes	Transport and catabolism	04144 Endocytosis
Cluster_5470	K12471	Cellular Processes	Transport and catabolism	04144 Endocytosis
Cluster_54930	K12183	Cellular Processes	Transport and catabolism	04144 Endocytosis
Cluster_5512	K01528	Cellular Processes	Transport and catabolism	04144 Endocytosis
Cluster_55134	K03283	Cellular Processes	Transport and catabolism	04144 Endocytosis
Cluster_55244	K18442	Cellular Processes	Transport and catabolism	04144 Endocytosis
Cluster_5533	"K01251,K07466,K08081,K12616,K14497,K12489"	Cellular Processes	Transport and catabolism	04144 Endocytosis
Cluster_55332	"K14309,K05349,K02183,K07466,K03283,K01115,K13414,K08852,K16226"	Cellular Processes	Transport and catabolism	04144 Endocytosis
Cluster_55555	"K07904,K07901"	Cellular Processes	Transport and catabolism	04144 Endocytosis
Cluster_55577	K07897	Cellular Processes	Transport and catabolism	04144 Endocytosis
Cluster_5587	K07904	Cellular Processes	Transport and catabolism	04144 Endocytosis
Cluster_55900	K12200	Cellular Processes	Transport and catabolism	04144 Endocytosis
Cluster_56014	K11247	Cellular Processes	Transport and catabolism	04144 Endocytosis
Cluster_56154	K05747	Cellular Processes	Transport and catabolism	04144 Endocytosis
Cluster_5627	"K01006,K05658,K14416,K03136,K13428,K13420,K12741,K14457,K00559,K01456,K12882,K04077,K00434,K01623,K03283,K17982,K04392,K07374,K12619,K01876,K01209,K02350"	Cellular Processes	Transport and catabolism	04144 Endocytosis
Cluster_56370	K12194	Cellular Processes	Transport and catabolism	04144 Endocytosis
Cluster_564	"K08081,K01251,K07466,K05391,K12489,K12616,K14497,K03243,K17982"	Cellular Processes	Transport and catabolism	04144 Endocytosis
Cluster_56836	K12492	Cellular Processes	Transport and catabolism	04144 Endocytosis
Cluster_57032	"K16225,K03283,K08852,K16911,K13457"	Cellular Processes	Transport and catabolism	04144 Endocytosis
Cluster_57040	K12184	Cellular Processes	Transport and catabolism	04144 Endocytosis
Cluster_5705	"K10396,K14565"	Cellular Processes	Transport and catabolism	04144 Endocytosis
Cluster_5733	"K05349,K14309,K07466,K02183,K01115,K13414,K03283,K16226,K08852"	Cellular Processes	Transport and catabolism	04144 Endocytosis
Cluster_57509	K12486	Cellular Processes	Transport and catabolism	04144 Endocytosis
Cluster_57556	"K03283,K04043"	Cellular Processes	Transport and catabolism	04144 Endocytosis
Cluster_5762	"K10396,K14565"	Cellular Processes	Transport and catabolism	04144 Endocytosis
Cluster_579	"K16226,K08852,K16911,K01115,K13414,K16225,K03283,K07466,K02183,K05349,K14309"	Cellular Processes	Transport and catabolism	04144 Endocytosis
Cluster_581	"K09291,K12472"	Cellular Processes	Transport and catabolism	04144 Endocytosis
Cluster_58223	"K05747,K00430"	Cellular Processes	Transport and catabolism	04144 Endocytosis
Cluster_58319	K12191	Cellular Processes	Transport and catabolism	04144 Endocytosis
Cluster_5835	K19366	Cellular Processes	Transport and catabolism	04144 Endocytosis
Cluster_5851	"K11262,K18443,K00121"	Cellular Processes	Transport and catabolism	04144 Endocytosis
Cluster_5858	K00889	Cellular Processes	Transport and catabolism	04144 Endocytosis
Cluster_58596	"K05349,K14309,K07466,K02183,K01115,K13414,K03283,K08852"	Cellular Processes	Transport and catabolism	04144 Endocytosis
Cluster_58820	"K07901,K00889,K07904"	Cellular Processes	Transport and catabolism	04144 Endocytosis
Cluster_58831	K03283	Cellular Processes	Transport and catabolism	04144 Endocytosis
Cluster_58861	K03283	Cellular Processes	Transport and catabolism	04144 Endocytosis
Cluster_5897	"K03243,K09291,K10866,K12472,K10396,K01883,K03254"	Cellular Processes	Transport and catabolism	04144 Endocytosis
Cluster_59288	K07937	Cellular Processes	Transport and catabolism	04144 Endocytosis
Cluster_594	"K13414,K01115,K16225,K03283,K16226,K08852,K05349,K14309,K07466,K02183"	Cellular Processes	Transport and catabolism	04144 Endocytosis
Cluster_59517	"K02899,K00889"	Cellular Processes	Transport and catabolism	04144 Endocytosis
Cluster_59612	K04646	Cellular Processes	Transport and catabolism	04144 Endocytosis
Cluster_59743	K19366	Cellular Processes	Transport and catabolism	04144 Endocytosis
Cluster_59750	K12194	Cellular Processes	Transport and catabolism	04144 Endocytosis
Cluster_59790	K03283	Cellular Processes	Transport and catabolism	04144 Endocytosis
Cluster_59863	K03283	Cellular Processes	Transport and catabolism	04144 Endocytosis
Cluster_5993	K12471	Cellular Processes	Transport and catabolism	04144 Endocytosis
Cluster_60041	"K03126,K00627,K05747,K03006,K00430,K14317"	Cellular Processes	Transport and catabolism	04144 Endocytosis
Cluster_6007	K07904	Cellular Processes	Transport and catabolism	04144 Endocytosis
Cluster_60494	K05747	Cellular Processes	Transport and catabolism	04144 Endocytosis
Cluster_60535	K07937	Cellular Processes	Transport and catabolism	04144 Endocytosis
Cluster_60551	"K03644,K12882,K13420,K00430,K05658,K05356,K01006,K01115,K01188,K14760,K07374,K01623"	Cellular Processes	Transport and catabolism	04144 Endocytosis
Cluster_60606	K03283	Cellular Processes	Transport and catabolism	04144 Endocytosis
Cluster_60640	K12486	Cellular Processes	Transport and catabolism	04144 Endocytosis
Cluster_6086	"K17917,K00858,K07562"	Cellular Processes	Transport and catabolism	04144 Endocytosis
Cluster_6087	K12486	Cellular Processes	Transport and catabolism	04144 Endocytosis
Cluster_610	"K10866,K09291,K12472"	Cellular Processes	Transport and catabolism	04144 Endocytosis
Cluster_612	"K09291,K12472"	Cellular Processes	Transport and catabolism	04144 Endocytosis
Cluster_6146	"K12472,K09291"	Cellular Processes	Transport and catabolism	04144 Endocytosis
Cluster_61995	K07901	Cellular Processes	Transport and catabolism	04144 Endocytosis
Cluster_6202	K12479	Cellular Processes	Transport and catabolism	04144 Endocytosis
Cluster_62364	K07901	Cellular Processes	Transport and catabolism	04144 Endocytosis
Cluster_624	"K10866,K09291,K12472"	Cellular Processes	Transport and catabolism	04144 Endocytosis
Cluster_62452	K04646	Cellular Processes	Transport and catabolism	04144 Endocytosis
Cluster_62453	K04646	Cellular Processes	Transport and catabolism	04144 Endocytosis
Cluster_62495	K01115	Cellular Processes	Transport and catabolism	04144 Endocytosis
Cluster_626	"K12472,K09291,K10866"	Cellular Processes	Transport and catabolism	04144 Endocytosis
Cluster_62600	K12492	Cellular Processes	Transport and catabolism	04144 Endocytosis
Cluster_62853	K11866	Cellular Processes	Transport and catabolism	04144 Endocytosis
Cluster_630	"K17982,K08503,K04079,K08081,K01251,K07466,K12489,K05391,K03243,K14497,K12616"	Cellular Processes	Transport and catabolism	04144 Endocytosis
Cluster_63008	K07904	Cellular Processes	Transport and catabolism	04144 Endocytosis
Cluster_63233	K12200	Cellular Processes	Transport and catabolism	04144 Endocytosis
Cluster_6359	"K07466,K02183,K05349,K14309,K16226,K08852,K16911,K13414,K01115,K03283"	Cellular Processes	Transport and catabolism	04144 Endocytosis
Cluster_63676	K03283	Cellular Processes	Transport and catabolism	04144 Endocytosis
Cluster_63870	"K03283,K04043"	Cellular Processes	Transport and catabolism	04144 Endocytosis
Cluster_6388	K01115	Cellular Processes	Transport and catabolism	04144 Endocytosis
Cluster_63932	K18443	Cellular Processes	Transport and catabolism	04144 Endocytosis
Cluster_6425	K19366	Cellular Processes	Transport and catabolism	04144 Endocytosis
Cluster_64544	"K03283,K04043"	Cellular Processes	Transport and catabolism	04144 Endocytosis
Cluster_64570	K04646	Cellular Processes	Transport and catabolism	04144 Endocytosis
Cluster_64839	"K00134,K05758"	Cellular Processes	Transport and catabolism	04144 Endocytosis
Cluster_64854	K07904	Cellular Processes	Transport and catabolism	04144 Endocytosis
Cluster_64871	"K04043,K03283,K09490"	Cellular Processes	Transport and catabolism	04144 Endocytosis
Cluster_65194	K18442	Cellular Processes	Transport and catabolism	04144 Endocytosis
Cluster_65291	K07937	Cellular Processes	Transport and catabolism	04144 Endocytosis
Cluster_65325	K03283	Cellular Processes	Transport and catabolism	04144 Endocytosis
Cluster_65409	K07937	Cellular Processes	Transport and catabolism	04144 Endocytosis
Cluster_65459	K19366	Cellular Processes	Transport and catabolism	04144 Endocytosis
Cluster_65556	K07904	Cellular Processes	Transport and catabolism	04144 Endocytosis
Cluster_65600	K12183	Cellular Processes	Transport and catabolism	04144 Endocytosis
Cluster_65615	K07901	Cellular Processes	Transport and catabolism	04144 Endocytosis
Cluster_6591	"K07466,K02183,K05349,K14309,K16226,K08852,K01115,K04646,K13414,K03283"	Cellular Processes	Transport and catabolism	04144 Endocytosis
Cluster_6592	"K13421,K14304,K12486"	Cellular Processes	Transport and catabolism	04144 Endocytosis
Cluster_66061	K01115	Cellular Processes	Transport and catabolism	04144 Endocytosis
Cluster_66062	K07937	Cellular Processes	Transport and catabolism	04144 Endocytosis
Cluster_662	K01115	Cellular Processes	Transport and catabolism	04144 Endocytosis
Cluster_66686	"K07904,K00889,K07901"	Cellular Processes	Transport and catabolism	04144 Endocytosis
Cluster_66836	K07904	Cellular Processes	Transport and catabolism	04144 Endocytosis
Cluster_67021	K07937	Cellular Processes	Transport and catabolism	04144 Endocytosis
Cluster_67109	K03283	Cellular Processes	Transport and catabolism	04144 Endocytosis
Cluster_67132	K07937	Cellular Processes	Transport and catabolism	04144 Endocytosis
Cluster_67547	K03283	Cellular Processes	Transport and catabolism	04144 Endocytosis
Cluster_6758	"K14304,K01115,K12486"	Cellular Processes	Transport and catabolism	04144 Endocytosis
Cluster_67664	K07901	Cellular Processes	Transport and catabolism	04144 Endocytosis
Cluster_681	"K12472,K12483"	Cellular Processes	Transport and catabolism	04144 Endocytosis
Cluster_6814	"K13412,K08852,K16226,K13459,K16225,K03283"	Cellular Processes	Transport and catabolism	04144 Endocytosis
Cluster_68174	K07901	Cellular Processes	Transport and catabolism	04144 Endocytosis
Cluster_68339	K12191	Cellular Processes	Transport and catabolism	04144 Endocytosis
Cluster_68839	K12486	Cellular Processes	Transport and catabolism	04144 Endocytosis
Cluster_6896	K07901	Cellular Processes	Transport and catabolism	04144 Endocytosis
Cluster_69055	K11247	Cellular Processes	Transport and catabolism	04144 Endocytosis
Cluster_69365	K12183	Cellular Processes	Transport and catabolism	04144 Endocytosis
Cluster_69471	K17917	Cellular Processes	Transport and catabolism	04144 Endocytosis
Cluster_6980	"K12472,K09291,K14565,K12811"	Cellular Processes	Transport and catabolism	04144 Endocytosis
Cluster_69802	K01115	Cellular Processes	Transport and catabolism	04144 Endocytosis
Cluster_70267	K03283	Cellular Processes	Transport and catabolism	04144 Endocytosis
Cluster_7039	K07904	Cellular Processes	Transport and catabolism	04144 Endocytosis
Cluster_7053	"K12795,K03283,K13342,K09561"	Cellular Processes	Transport and catabolism	04144 Endocytosis
Cluster_70897	K12194	Cellular Processes	Transport and catabolism	04144 Endocytosis
Cluster_70978	K03283	Cellular Processes	Transport and catabolism	04144 Endocytosis
Cluster_71010	K07937	Cellular Processes	Transport and catabolism	04144 Endocytosis
Cluster_71238	K18466	Cellular Processes	Transport and catabolism	04144 Endocytosis
Cluster_71514	K03283	Cellular Processes	Transport and catabolism	04144 Endocytosis
Cluster_7153	K12486	Cellular Processes	Transport and catabolism	04144 Endocytosis
Cluster_716	K10396	Cellular Processes	Transport and catabolism	04144 Endocytosis
Cluster_7169	"K13525,K03063,K12196,K00679"	Cellular Processes	Transport and catabolism	04144 Endocytosis
Cluster_71981	K12489	Cellular Processes	Transport and catabolism	04144 Endocytosis
Cluster_72066	"K00889,K07901,K07904"	Cellular Processes	Transport and catabolism	04144 Endocytosis
Cluster_72389	K07901	Cellular Processes	Transport and catabolism	04144 Endocytosis
Cluster_725	"K01792,K10396"	Cellular Processes	Transport and catabolism	04144 Endocytosis
Cluster_7289	"K09291,K12472"	Cellular Processes	Transport and catabolism	04144 Endocytosis
Cluster_72954	K05747	Cellular Processes	Transport and catabolism	04144 Endocytosis
Cluster_73083	"K14309,K16225,K03283,K16911"	Cellular Processes	Transport and catabolism	04144 Endocytosis
Cluster_732	K01115	Cellular Processes	Transport and catabolism	04144 Endocytosis
Cluster_73218	K12486	Cellular Processes	Transport and catabolism	04144 Endocytosis
Cluster_73288	"K07904,K07901"	Cellular Processes	Transport and catabolism	04144 Endocytosis
Cluster_735	K12471	Cellular Processes	Transport and catabolism	04144 Endocytosis
Cluster_7350	K00889	Cellular Processes	Transport and catabolism	04144 Endocytosis
Cluster_73593	K12471	Cellular Processes	Transport and catabolism	04144 Endocytosis
Cluster_73608	K12492	Cellular Processes	Transport and catabolism	04144 Endocytosis
Cluster_73984	K12483	Cellular Processes	Transport and catabolism	04144 Endocytosis
Cluster_74011	K07889	Cellular Processes	Transport and catabolism	04144 Endocytosis
Cluster_74453	K01528	Cellular Processes	Transport and catabolism	04144 Endocytosis
Cluster_74985	K03283	Cellular Processes	Transport and catabolism	04144 Endocytosis
Cluster_75084	K12183	Cellular Processes	Transport and catabolism	04144 Endocytosis
Cluster_751	"K16226,K08852,K16911,K16225,K03283,K13414,K01115,K02183,K07466,K14309,K05349"	Cellular Processes	Transport and catabolism	04144 Endocytosis
Cluster_75492	K03283	Cellular Processes	Transport and catabolism	04144 Endocytosis
Cluster_7580	K19366	Cellular Processes	Transport and catabolism	04144 Endocytosis
Cluster_7581	"K13421,K14304,K12486"	Cellular Processes	Transport and catabolism	04144 Endocytosis
Cluster_7587	"K03243,K09291,K12472,K11984"	Cellular Processes	Transport and catabolism	04144 Endocytosis
Cluster_75953	"K08852,K01115,K13414,K03283,K07466,K02183,K05349,K14309"	Cellular Processes	Transport and catabolism	04144 Endocytosis
Cluster_761	"K14515,K12188,K17605"	Cellular Processes	Transport and catabolism	04144 Endocytosis
Cluster_7610	K12471	Cellular Processes	Transport and catabolism	04144 Endocytosis
Cluster_76821	"K03283,K14309"	Cellular Processes	Transport and catabolism	04144 Endocytosis
Cluster_77035	K07937	Cellular Processes	Transport and catabolism	04144 Endocytosis
Cluster_77272	"K08852,K16225,K03283"	Cellular Processes	Transport and catabolism	04144 Endocytosis
Cluster_77303	K04646	Cellular Processes	Transport and catabolism	04144 Endocytosis
Cluster_77495	K03283	Cellular Processes	Transport and catabolism	04144 Endocytosis
Cluster_7753	K12471	Cellular Processes	Transport and catabolism	04144 Endocytosis
Cluster_776	"K05666,K13356,K13457,K15086,K05605,K01191,K16196,K05756,K00566,K12819,K01738"	Cellular Processes	Transport and catabolism	04144 Endocytosis
Cluster_77779	K07904	Cellular Processes	Transport and catabolism	04144 Endocytosis
Cluster_780	"K09291,K10866,K12472"	Cellular Processes	Transport and catabolism	04144 Endocytosis
Cluster_7809	K19476	Cellular Processes	Transport and catabolism	04144 Endocytosis
Cluster_7813	K01528	Cellular Processes	Transport and catabolism	04144 Endocytosis
Cluster_7824	"K07897,K07904"	Cellular Processes	Transport and catabolism	04144 Endocytosis
Cluster_783	"K10396,K14565"	Cellular Processes	Transport and catabolism	04144 Endocytosis
Cluster_78462	K01115	Cellular Processes	Transport and catabolism	04144 Endocytosis
Cluster_78466	K01528	Cellular Processes	Transport and catabolism	04144 Endocytosis
Cluster_78601	K04646	Cellular Processes	Transport and catabolism	04144 Endocytosis
Cluster_7878	"K09291,K03231,K12472"	Cellular Processes	Transport and catabolism	04144 Endocytosis
Cluster_792	K00889	Cellular Processes	Transport and catabolism	04144 Endocytosis
Cluster_793	"K02183,K04706,K07466,K13457,K14309,K16911,K08852,K16226,K03283,K16225,K01115,K04646,K13414,K14314"	Cellular Processes	Transport and catabolism	04144 Endocytosis
Cluster_79341	K12194	Cellular Processes	Transport and catabolism	04144 Endocytosis
Cluster_7950	"K18443,K11262"	Cellular Processes	Transport and catabolism	04144 Endocytosis
Cluster_79679	K12489	Cellular Processes	Transport and catabolism	04144 Endocytosis
Cluster_7978	K12483	Cellular Processes	Transport and catabolism	04144 Endocytosis
Cluster_7998	K12199	Cellular Processes	Transport and catabolism	04144 Endocytosis
Cluster_80	"K13459,K08852,K16226,K16911,K16225,K03283,K12819,K13457,K00514,K14309"	Cellular Processes	Transport and catabolism	04144 Endocytosis
Cluster_80107	K12196	Cellular Processes	Transport and catabolism	04144 Endocytosis
Cluster_8037	"K18443,K12471"	Cellular Processes	Transport and catabolism	04144 Endocytosis
Cluster_80465	K03283	Cellular Processes	Transport and catabolism	04144 Endocytosis
Cluster_80485	K18443	Cellular Processes	Transport and catabolism	04144 Endocytosis
Cluster_80590	K19366	Cellular Processes	Transport and catabolism	04144 Endocytosis
Cluster_8060	K11839	Cellular Processes	Transport and catabolism	04144 Endocytosis
Cluster_80613	K07937	Cellular Processes	Transport and catabolism	04144 Endocytosis
Cluster_8089	K19366	Cellular Processes	Transport and catabolism	04144 Endocytosis
Cluster_8142	"K16226,K03283,K16225"	Cellular Processes	Transport and catabolism	04144 Endocytosis
Cluster_81476	K03283	Cellular Processes	Transport and catabolism	04144 Endocytosis
Cluster_81609	"K07198,K05658,K01191,K00627,K14326,K01115,K12619,K14760"	Cellular Processes	Transport and catabolism	04144 Endocytosis
Cluster_81785	K07937	Cellular Processes	Transport and catabolism	04144 Endocytosis
Cluster_81891	K12198	Cellular Processes	Transport and catabolism	04144 Endocytosis
Cluster_82093	K07937	Cellular Processes	Transport and catabolism	04144 Endocytosis
Cluster_82187	K07897	Cellular Processes	Transport and catabolism	04144 Endocytosis
Cluster_82272	K07937	Cellular Processes	Transport and catabolism	04144 Endocytosis
Cluster_82281	"K03283,K04043,K14066"	Cellular Processes	Transport and catabolism	04144 Endocytosis
Cluster_82376	K03283	Cellular Processes	Transport and catabolism	04144 Endocytosis
Cluster_82568	"K02899,K00889"	Cellular Processes	Transport and catabolism	04144 Endocytosis
Cluster_82579	K12486	Cellular Processes	Transport and catabolism	04144 Endocytosis
Cluster_82833	K18443	Cellular Processes	Transport and catabolism	04144 Endocytosis
Cluster_8292	"K10396,K09291,K10866,K12472"	Cellular Processes	Transport and catabolism	04144 Endocytosis
Cluster_8321	K12196	Cellular Processes	Transport and catabolism	04144 Endocytosis
Cluster_83265	K07897	Cellular Processes	Transport and catabolism	04144 Endocytosis
Cluster_83337	K03283	Cellular Processes	Transport and catabolism	04144 Endocytosis
Cluster_83390	K03283	Cellular Processes	Transport and catabolism	04144 Endocytosis
Cluster_835	"K03652,K10396"	Cellular Processes	Transport and catabolism	04144 Endocytosis
Cluster_8412	"K05747,K12602"	Cellular Processes	Transport and catabolism	04144 Endocytosis
Cluster_84124	"K12486,K13421"	Cellular Processes	Transport and catabolism	04144 Endocytosis
Cluster_84181	K07937	Cellular Processes	Transport and catabolism	04144 Endocytosis
Cluster_8424	K01115	Cellular Processes	Transport and catabolism	04144 Endocytosis
Cluster_8500	K12486	Cellular Processes	Transport and catabolism	04144 Endocytosis
Cluster_85203	K07937	Cellular Processes	Transport and catabolism	04144 Endocytosis
Cluster_85298	K19366	Cellular Processes	Transport and catabolism	04144 Endocytosis
Cluster_85853	K12191	Cellular Processes	Transport and catabolism	04144 Endocytosis
Cluster_8599	"K16225,K03283,K16226,K08852,K14309,K13457"	Cellular Processes	Transport and catabolism	04144 Endocytosis
Cluster_86168	K07901	Cellular Processes	Transport and catabolism	04144 Endocytosis
Cluster_86182	K17917	Cellular Processes	Transport and catabolism	04144 Endocytosis
Cluster_8621	"K13946,K00021,K19476"	Cellular Processes	Transport and catabolism	04144 Endocytosis
Cluster_8635	"K12486,K13421,K14304"	Cellular Processes	Transport and catabolism	04144 Endocytosis
Cluster_8642	"K13417,K13430,K01183,K03283,K13416"	Cellular Processes	Transport and catabolism	04144 Endocytosis
Cluster_868	"K05349,K14309,K07466,K02183,K01115,K04646,K13414,K16225,K03283,K16226,K08852"	Cellular Processes	Transport and catabolism	04144 Endocytosis
Cluster_873	"K13415,K12489"	Cellular Processes	Transport and catabolism	04144 Endocytosis
Cluster_87392	K03283	Cellular Processes	Transport and catabolism	04144 Endocytosis
Cluster_87393	"K12486,K13421"	Cellular Processes	Transport and catabolism	04144 Endocytosis
Cluster_87531	K05747	Cellular Processes	Transport and catabolism	04144 Endocytosis
Cluster_87675	K01115	Cellular Processes	Transport and catabolism	04144 Endocytosis
Cluster_88030	"K18443,K00121"	Cellular Processes	Transport and catabolism	04144 Endocytosis
Cluster_88527	K03283	Cellular Processes	Transport and catabolism	04144 Endocytosis
Cluster_88625	K04646	Cellular Processes	Transport and catabolism	04144 Endocytosis
Cluster_8874	K11826	Cellular Processes	Transport and catabolism	04144 Endocytosis
Cluster_8876	K07901	Cellular Processes	Transport and catabolism	04144 Endocytosis
Cluster_88817	K19366	Cellular Processes	Transport and catabolism	04144 Endocytosis
Cluster_8894	K12486	Cellular Processes	Transport and catabolism	04144 Endocytosis
Cluster_89125	K03283	Cellular Processes	Transport and catabolism	04144 Endocytosis
Cluster_89197	K12492	Cellular Processes	Transport and catabolism	04144 Endocytosis
Cluster_8924	K19366	Cellular Processes	Transport and catabolism	04144 Endocytosis
Cluster_89250	K03283	Cellular Processes	Transport and catabolism	04144 Endocytosis
Cluster_89254	K12191	Cellular Processes	Transport and catabolism	04144 Endocytosis
Cluster_89605	K03283	Cellular Processes	Transport and catabolism	04144 Endocytosis
Cluster_89850	K07937	Cellular Processes	Transport and catabolism	04144 Endocytosis
Cluster_89923	K19366	Cellular Processes	Transport and catabolism	04144 Endocytosis
Cluster_8996	"K04392,K04393"	Cellular Processes	Transport and catabolism	04144 Endocytosis
Cluster_900	"K09291,K00826,K10866,K12472"	Cellular Processes	Transport and catabolism	04144 Endocytosis
Cluster_9005	K11866	Cellular Processes	Transport and catabolism	04144 Endocytosis
Cluster_90266	K17917	Cellular Processes	Transport and catabolism	04144 Endocytosis
Cluster_90370	K07904	Cellular Processes	Transport and catabolism	04144 Endocytosis
Cluster_90496	K03283	Cellular Processes	Transport and catabolism	04144 Endocytosis
Cluster_90561	K12191	Cellular Processes	Transport and catabolism	04144 Endocytosis
Cluster_91155	K04646	Cellular Processes	Transport and catabolism	04144 Endocytosis
Cluster_9179	"K13457,K13459,K08852,K16911,K03283,K16225"	Cellular Processes	Transport and catabolism	04144 Endocytosis
Cluster_919	"K01115,K13414,K03283,K16225,K16226,K08852,K16911,K14309,K13457,K07466,K02183"	Cellular Processes	Transport and catabolism	04144 Endocytosis
Cluster_93269	K18443	Cellular Processes	Transport and catabolism	04144 Endocytosis
Cluster_93579	K07937	Cellular Processes	Transport and catabolism	04144 Endocytosis
Cluster_94497	K07937	Cellular Processes	Transport and catabolism	04144 Endocytosis
Cluster_9451	K11866	Cellular Processes	Transport and catabolism	04144 Endocytosis
Cluster_94968	"K03283,K13414,K04646,K01115,K08852,K14309,K05349,K02183,K07466"	Cellular Processes	Transport and catabolism	04144 Endocytosis
Cluster_95015	"K00430,K05747,K03006,K14317"	Cellular Processes	Transport and catabolism	04144 Endocytosis
Cluster_95378	"K07466,K02183,K13414,K01115,K03283,K16226,K08852"	Cellular Processes	Transport and catabolism	04144 Endocytosis
Cluster_95399	K07901	Cellular Processes	Transport and catabolism	04144 Endocytosis
Cluster_95619	"K04043,K03283"	Cellular Processes	Transport and catabolism	04144 Endocytosis
Cluster_9568	K18443	Cellular Processes	Transport and catabolism	04144 Endocytosis
Cluster_95744	K07904	Cellular Processes	Transport and catabolism	04144 Endocytosis
Cluster_9606	K19476	Cellular Processes	Transport and catabolism	04144 Endocytosis
Cluster_96075	K12191	Cellular Processes	Transport and catabolism	04144 Endocytosis
Cluster_9622	"K12489,K12897,K14508"	Cellular Processes	Transport and catabolism	04144 Endocytosis
Cluster_96272	K07937	Cellular Processes	Transport and catabolism	04144 Endocytosis
Cluster_96715	K03283	Cellular Processes	Transport and catabolism	04144 Endocytosis
Cluster_969	"K07374,K17982,K03283,K01623,K12619,K01209,K01876,K02350,K04564,K05290,K01006,K14400,K03136,K05658,K07198,K13420,K13428,K04077,K12882,K01456,K00559"	Cellular Processes	Transport and catabolism	04144 Endocytosis
Cluster_97199	K12486	Cellular Processes	Transport and catabolism	04144 Endocytosis
Cluster_9725	"K12196,K03231,K13525"	Cellular Processes	Transport and catabolism	04144 Endocytosis
Cluster_9726	"K03283,K13416,K01183,K13430"	Cellular Processes	Transport and catabolism	04144 Endocytosis
Cluster_9741	"K02183,K14309,K05349,K16226,K08852,K03283,K13414,K01115"	Cellular Processes	Transport and catabolism	04144 Endocytosis
Cluster_97435	K18468	Cellular Processes	Transport and catabolism	04144 Endocytosis
Cluster_97923	"K12472,K09291"	Cellular Processes	Transport and catabolism	04144 Endocytosis
Cluster_9805	"K12489,K12616,K14497,K07466,K01251"	Cellular Processes	Transport and catabolism	04144 Endocytosis
Cluster_984	"K12472,K00826,K09291,K10866"	Cellular Processes	Transport and catabolism	04144 Endocytosis
Cluster_98585	K05754	Cellular Processes	Transport and catabolism	04144 Endocytosis
Cluster_98830	"K00889,K07901"	Cellular Processes	Transport and catabolism	04144 Endocytosis
Cluster_9887	K12486	Cellular Processes	Transport and catabolism	04144 Endocytosis
Cluster_98995	K17917	Cellular Processes	Transport and catabolism	04144 Endocytosis
Cluster_99296	K04646	Cellular Processes	Transport and catabolism	04144 Endocytosis
Cluster_99353	K01115	Cellular Processes	Transport and catabolism	04144 Endocytosis
Cluster_99679	K04646	Cellular Processes	Transport and catabolism	04144 Endocytosis
Cluster_99690	K11866	Cellular Processes	Transport and catabolism	04144 Endocytosis
Cluster_99736	K01528	Cellular Processes	Transport and catabolism	04144 Endocytosis
Cluster_9996	"K12472,K03243,K12813,K12811"	Cellular Processes	Transport and catabolism	04144 Endocytosis
Cluster_99998	K07937	Cellular Processes	Transport and catabolism	04144 Endocytosis
Cluster_10032	K10666	Genetic Information Processing	"Folding, sorting and degradation"	04141 Protein processing in endoplasmic reticulum
Cluster_100432	K10578	Genetic Information Processing	"Folding, sorting and degradation"	04141 Protein processing in endoplasmic reticulum
Cluster_10084	"K09584,K09580,K13984"	Genetic Information Processing	"Folding, sorting and degradation"	04141 Protein processing in endoplasmic reticulum
Cluster_100867	K09503	Genetic Information Processing	"Folding, sorting and degradation"	04141 Protein processing in endoplasmic reticulum
Cluster_100894	K04079	Genetic Information Processing	"Folding, sorting and degradation"	04141 Protein processing in endoplasmic reticulum
Cluster_101399	K03094	Genetic Information Processing	"Folding, sorting and degradation"	04141 Protein processing in endoplasmic reticulum
Cluster_1016	"K02350,K07198,K10590,K03363,K12619,K01738,K05658,K03283"	Genetic Information Processing	"Folding, sorting and degradation"	04141 Protein processing in endoplasmic reticulum
Cluster_10247	"K08852,K16226,K02183,K01115,K13414,K05349,K14309,K03283"	Genetic Information Processing	"Folding, sorting and degradation"	04141 Protein processing in endoplasmic reticulum
Cluster_102478	K03347	Genetic Information Processing	"Folding, sorting and degradation"	04141 Protein processing in endoplasmic reticulum
Cluster_10291	K14012	Genetic Information Processing	"Folding, sorting and degradation"	04141 Protein processing in endoplasmic reticulum
Cluster_10326	"K05283,K01230,K10875,K04708"	Genetic Information Processing	"Folding, sorting and degradation"	04141 Protein processing in endoplasmic reticulum
Cluster_103511	K09487	Genetic Information Processing	"Folding, sorting and degradation"	04141 Protein processing in endoplasmic reticulum
Cluster_10354	K03283	Genetic Information Processing	"Folding, sorting and degradation"	04141 Protein processing in endoplasmic reticulum
Cluster_10393	K09503	Genetic Information Processing	"Folding, sorting and degradation"	04141 Protein processing in endoplasmic reticulum
Cluster_1041	"K12619,K01738,K05658,K03283,K02350,K07198,K03363,K10590"	Genetic Information Processing	"Folding, sorting and degradation"	04141 Protein processing in endoplasmic reticulum
Cluster_104544	"K06689,K10576"	Genetic Information Processing	"Folding, sorting and degradation"	04141 Protein processing in endoplasmic reticulum
Cluster_10478	K03347	Genetic Information Processing	"Folding, sorting and degradation"	04141 Protein processing in endoplasmic reticulum
Cluster_104785	K13250	Genetic Information Processing	"Folding, sorting and degradation"	04141 Protein processing in endoplasmic reticulum
Cluster_1049	"K13457,K13525,K16226,K08852,K13412,K14314,K14309,K16225,K03283"	Genetic Information Processing	"Folding, sorting and degradation"	04141 Protein processing in endoplasmic reticulum
Cluster_104945	K03283	Genetic Information Processing	"Folding, sorting and degradation"	04141 Protein processing in endoplasmic reticulum
Cluster_10523	K09584	Genetic Information Processing	"Folding, sorting and degradation"	04141 Protein processing in endoplasmic reticulum
Cluster_105233	K03237	Genetic Information Processing	"Folding, sorting and degradation"	04141 Protein processing in endoplasmic reticulum
Cluster_10537	"K09517,K09518,K09523,K09503"	Genetic Information Processing	"Folding, sorting and degradation"	04141 Protein processing in endoplasmic reticulum
Cluster_105994	K06689	Genetic Information Processing	"Folding, sorting and degradation"	04141 Protein processing in endoplasmic reticulum
Cluster_106691	K09503	Genetic Information Processing	"Folding, sorting and degradation"	04141 Protein processing in endoplasmic reticulum
Cluster_10686	"K09518,K09503,K09517,K09523"	Genetic Information Processing	"Folding, sorting and degradation"	04141 Protein processing in endoplasmic reticulum
Cluster_10729	"K09584,K09523"	Genetic Information Processing	"Folding, sorting and degradation"	04141 Protein processing in endoplasmic reticulum
Cluster_10750	K14003	Genetic Information Processing	"Folding, sorting and degradation"	04141 Protein processing in endoplasmic reticulum
Cluster_10765	"K05283,K14317,K10875,K01230"	Genetic Information Processing	"Folding, sorting and degradation"	04141 Protein processing in endoplasmic reticulum
Cluster_10772	"K10875,K14317,K10601"	Genetic Information Processing	"Folding, sorting and degradation"	04141 Protein processing in endoplasmic reticulum
Cluster_10815	"K10570,K03130,K14018,K14549,K12662,K15542,K14555"	Genetic Information Processing	"Folding, sorting and degradation"	04141 Protein processing in endoplasmic reticulum
Cluster_10820	K09503	Genetic Information Processing	"Folding, sorting and degradation"	04141 Protein processing in endoplasmic reticulum
Cluster_10840	K12669	Genetic Information Processing	"Folding, sorting and degradation"	04141 Protein processing in endoplasmic reticulum
Cluster_10844	K10666	Genetic Information Processing	"Folding, sorting and degradation"	04141 Protein processing in endoplasmic reticulum
Cluster_109005	K03283	Genetic Information Processing	"Folding, sorting and degradation"	04141 Protein processing in endoplasmic reticulum
Cluster_10922	"K10601,K14317,K10875"	Genetic Information Processing	"Folding, sorting and degradation"	04141 Protein processing in endoplasmic reticulum
Cluster_10924	K01228	Genetic Information Processing	"Folding, sorting and degradation"	04141 Protein processing in endoplasmic reticulum
Cluster_109383	K06689	Genetic Information Processing	"Folding, sorting and degradation"	04141 Protein processing in endoplasmic reticulum
Cluster_1097	"K09487,K10636,K16196"	Genetic Information Processing	"Folding, sorting and degradation"	04141 Protein processing in endoplasmic reticulum
Cluster_1100	"K05349,K14309,K07466,K02183,K01115,K13414,K03283,K16225,K08852,K16226,K16911"	Genetic Information Processing	"Folding, sorting and degradation"	04141 Protein processing in endoplasmic reticulum
Cluster_110067	K03283	Genetic Information Processing	"Folding, sorting and degradation"	04141 Protein processing in endoplasmic reticulum
Cluster_11036	"K04079,K01889,K01915"	Genetic Information Processing	"Folding, sorting and degradation"	04141 Protein processing in endoplasmic reticulum
Cluster_110436	K10956	Genetic Information Processing	"Folding, sorting and degradation"	04141 Protein processing in endoplasmic reticulum
Cluster_11102	K10666	Genetic Information Processing	"Folding, sorting and degradation"	04141 Protein processing in endoplasmic reticulum
Cluster_111136	"K03066,K03061,K03064,K14571,K03063,K13525"	Genetic Information Processing	"Folding, sorting and degradation"	04141 Protein processing in endoplasmic reticulum
Cluster_11190	K04374	Genetic Information Processing	"Folding, sorting and degradation"	04141 Protein processing in endoplasmic reticulum
Cluster_11228	K14011	Genetic Information Processing	"Folding, sorting and degradation"	04141 Protein processing in endoplasmic reticulum
Cluster_112367	K09490	Genetic Information Processing	"Folding, sorting and degradation"	04141 Protein processing in endoplasmic reticulum
Cluster_112625	K11718	Genetic Information Processing	"Folding, sorting and degradation"	04141 Protein processing in endoplasmic reticulum
Cluster_11264	"K10976,K10950"	Genetic Information Processing	"Folding, sorting and degradation"	04141 Protein processing in endoplasmic reticulum
Cluster_112891	K03283	Genetic Information Processing	"Folding, sorting and degradation"	04141 Protein processing in endoplasmic reticulum
Cluster_112965	K07151	Genetic Information Processing	"Folding, sorting and degradation"	04141 Protein processing in endoplasmic reticulum
Cluster_11317	"K03260,K08852,K06236"	Genetic Information Processing	"Folding, sorting and degradation"	04141 Protein processing in endoplasmic reticulum
Cluster_113794	K03868	Genetic Information Processing	"Folding, sorting and degradation"	04141 Protein processing in endoplasmic reticulum
Cluster_113911	K09580	Genetic Information Processing	"Folding, sorting and degradation"	04141 Protein processing in endoplasmic reticulum
Cluster_11440	"K03260,K08852"	Genetic Information Processing	"Folding, sorting and degradation"	04141 Protein processing in endoplasmic reticulum
Cluster_11475	"K08332,K01876,K09561,K10260"	Genetic Information Processing	"Folding, sorting and degradation"	04141 Protein processing in endoplasmic reticulum
Cluster_1148	K13993	Genetic Information Processing	"Folding, sorting and degradation"	04141 Protein processing in endoplasmic reticulum
Cluster_11554	"K11816,K05283,K10875,K01230"	Genetic Information Processing	"Folding, sorting and degradation"	04141 Protein processing in endoplasmic reticulum
Cluster_116095	K09580	Genetic Information Processing	"Folding, sorting and degradation"	04141 Protein processing in endoplasmic reticulum
Cluster_11669	K14007	Genetic Information Processing	"Folding, sorting and degradation"	04141 Protein processing in endoplasmic reticulum
Cluster_117080	K09562	Genetic Information Processing	"Folding, sorting and degradation"	04141 Protein processing in endoplasmic reticulum
Cluster_11767	K09490	Genetic Information Processing	"Folding, sorting and degradation"	04141 Protein processing in endoplasmic reticulum
Cluster_11813	K09580	Genetic Information Processing	"Folding, sorting and degradation"	04141 Protein processing in endoplasmic reticulum
Cluster_118598	K13989	Genetic Information Processing	"Folding, sorting and degradation"	04141 Protein processing in endoplasmic reticulum
Cluster_11891	K03283	Genetic Information Processing	"Folding, sorting and degradation"	04141 Protein processing in endoplasmic reticulum
Cluster_118979	"K06689,K10576"	Genetic Information Processing	"Folding, sorting and degradation"	04141 Protein processing in endoplasmic reticulum
Cluster_11904	K09503	Genetic Information Processing	"Folding, sorting and degradation"	04141 Protein processing in endoplasmic reticulum
Cluster_119092	K04079	Genetic Information Processing	"Folding, sorting and degradation"	04141 Protein processing in endoplasmic reticulum
Cluster_119622	K09503	Genetic Information Processing	"Folding, sorting and degradation"	04141 Protein processing in endoplasmic reticulum
Cluster_11976	K08288	Genetic Information Processing	"Folding, sorting and degradation"	04141 Protein processing in endoplasmic reticulum
Cluster_12009	"K08852,K03260"	Genetic Information Processing	"Folding, sorting and degradation"	04141 Protein processing in endoplasmic reticulum
Cluster_12037	"K08332,K01876,K09561,K10260"	Genetic Information Processing	"Folding, sorting and degradation"	04141 Protein processing in endoplasmic reticulum
Cluster_12038	"K14016,K01653"	Genetic Information Processing	"Folding, sorting and degradation"	04141 Protein processing in endoplasmic reticulum
Cluster_12045	"K09517,K09503"	Genetic Information Processing	"Folding, sorting and degradation"	04141 Protein processing in endoplasmic reticulum
Cluster_12056	K09562	Genetic Information Processing	"Folding, sorting and degradation"	04141 Protein processing in endoplasmic reticulum
Cluster_1208	K10597	Genetic Information Processing	"Folding, sorting and degradation"	04141 Protein processing in endoplasmic reticulum
Cluster_12080	"K16226,K03283,K16225,K14314"	Genetic Information Processing	"Folding, sorting and degradation"	04141 Protein processing in endoplasmic reticulum
Cluster_12127	K10661	Genetic Information Processing	"Folding, sorting and degradation"	04141 Protein processing in endoplasmic reticulum
Cluster_12132	"K14555,K10260,K12857,K00600,K14018,K12816,K14556,K03130,K12662,K14549"	Genetic Information Processing	"Folding, sorting and degradation"	04141 Protein processing in endoplasmic reticulum
Cluster_12140	K09561	Genetic Information Processing	"Folding, sorting and degradation"	04141 Protein processing in endoplasmic reticulum
Cluster_12226	"K09517,K09503"	Genetic Information Processing	"Folding, sorting and degradation"	04141 Protein processing in endoplasmic reticulum
Cluster_12286	"K09561,K10260,K08332,K01876"	Genetic Information Processing	"Folding, sorting and degradation"	04141 Protein processing in endoplasmic reticulum
Cluster_12302	"K03136,K03283"	Genetic Information Processing	"Folding, sorting and degradation"	04141 Protein processing in endoplasmic reticulum
Cluster_12320	"K01230,K05283,K11816,K04708"	Genetic Information Processing	"Folding, sorting and degradation"	04141 Protein processing in endoplasmic reticulum
Cluster_12341	"K09580,K09584"	Genetic Information Processing	"Folding, sorting and degradation"	04141 Protein processing in endoplasmic reticulum
Cluster_124	"K05756,K00566,K01738,K12819,K13356,K13457,K05666,K16196,K05605,K01191,K15086"	Genetic Information Processing	"Folding, sorting and degradation"	04141 Protein processing in endoplasmic reticulum
Cluster_12413	K11863	Genetic Information Processing	"Folding, sorting and degradation"	04141 Protein processing in endoplasmic reticulum
Cluster_1244	"K02350,K00627,K12619,K07374,K14760,K03283,K01623,K04077,K14539,K12882,K01456,K12741,K07198,K13420,K13428,K01191,K05658,K00654,K05356"	Genetic Information Processing	"Folding, sorting and degradation"	04141 Protein processing in endoplasmic reticulum
Cluster_12462	K03094	Genetic Information Processing	"Folding, sorting and degradation"	04141 Protein processing in endoplasmic reticulum
Cluster_12465	"K09518,K00893"	Genetic Information Processing	"Folding, sorting and degradation"	04141 Protein processing in endoplasmic reticulum
Cluster_12510	K03094	Genetic Information Processing	"Folding, sorting and degradation"	04141 Protein processing in endoplasmic reticulum
Cluster_12520	K03094	Genetic Information Processing	"Folding, sorting and degradation"	04141 Protein processing in endoplasmic reticulum
Cluster_12555	"K13229,K05277,K05278,K13525"	Genetic Information Processing	"Folding, sorting and degradation"	04141 Protein processing in endoplasmic reticulum
Cluster_12562	"K12196,K03231,K13525"	Genetic Information Processing	"Folding, sorting and degradation"	04141 Protein processing in endoplasmic reticulum
Cluster_126	"K12489,K14497,K14487,K03243,K08081,K04079,K00815,K07466,K01251,K17982"	Genetic Information Processing	"Folding, sorting and degradation"	04141 Protein processing in endoplasmic reticulum
Cluster_12611	"K09523,K09518"	Genetic Information Processing	"Folding, sorting and degradation"	04141 Protein processing in endoplasmic reticulum
Cluster_12742	K08057	Genetic Information Processing	"Folding, sorting and degradation"	04141 Protein processing in endoplasmic reticulum
Cluster_12761	K10661	Genetic Information Processing	"Folding, sorting and degradation"	04141 Protein processing in endoplasmic reticulum
Cluster_12841	K03094	Genetic Information Processing	"Folding, sorting and degradation"	04141 Protein processing in endoplasmic reticulum
Cluster_12940	K03283	Genetic Information Processing	"Folding, sorting and degradation"	04141 Protein processing in endoplasmic reticulum
Cluster_12979	"K01876,K08332,K10260,K09561"	Genetic Information Processing	"Folding, sorting and degradation"	04141 Protein processing in endoplasmic reticulum
Cluster_13010	"K15542,K14004,K13341,K12662"	Genetic Information Processing	"Folding, sorting and degradation"	04141 Protein processing in endoplasmic reticulum
Cluster_13095	K09561	Genetic Information Processing	"Folding, sorting and degradation"	04141 Protein processing in endoplasmic reticulum
Cluster_13108	K03868	Genetic Information Processing	"Folding, sorting and degradation"	04141 Protein processing in endoplasmic reticulum
Cluster_1318	K13525	Genetic Information Processing	"Folding, sorting and degradation"	04141 Protein processing in endoplasmic reticulum
Cluster_13187	"K08332,K01876,K09561,K10260"	Genetic Information Processing	"Folding, sorting and degradation"	04141 Protein processing in endoplasmic reticulum
Cluster_13206	K09561	Genetic Information Processing	"Folding, sorting and degradation"	04141 Protein processing in endoplasmic reticulum
Cluster_13357	"K13414,K01115,K03283,K16911,K08852,K16226,K05349,K14309,K07466,K02183"	Genetic Information Processing	"Folding, sorting and degradation"	04141 Protein processing in endoplasmic reticulum
Cluster_13469	K03094	Genetic Information Processing	"Folding, sorting and degradation"	04141 Protein processing in endoplasmic reticulum
Cluster_135	"K00654,K05658,K01191,K05356,K01456,K00559,K12882,K14539,K04077,K13428,K13420,K07198,K12741,K12619,K01623,K03283,K14760,K07374,K02350,K00627"	Genetic Information Processing	"Folding, sorting and degradation"	04141 Protein processing in endoplasmic reticulum
Cluster_13520	"K03283,K04646,K01115,K13414,K08852,K16226,K14309,K05349,K02183"	Genetic Information Processing	"Folding, sorting and degradation"	04141 Protein processing in endoplasmic reticulum
Cluster_13627	K10666	Genetic Information Processing	"Folding, sorting and degradation"	04141 Protein processing in endoplasmic reticulum
Cluster_13655	K14006	Genetic Information Processing	"Folding, sorting and degradation"	04141 Protein processing in endoplasmic reticulum
Cluster_13723	"K13525,K03231,K14571,K12196"	Genetic Information Processing	"Folding, sorting and degradation"	04141 Protein processing in endoplasmic reticulum
Cluster_1377	K03094	Genetic Information Processing	"Folding, sorting and degradation"	04141 Protein processing in endoplasmic reticulum
Cluster_13801	"K05658,K00454,K14416,K01191,K14400,K01456,K14489,K14539,K00430,K12741,K07198,K12619,K12604,K01623,K13648,K17982,K02350,K01209"	Genetic Information Processing	"Folding, sorting and degradation"	04141 Protein processing in endoplasmic reticulum
Cluster_13807	"K09561,K10260,K08332,K01876"	Genetic Information Processing	"Folding, sorting and degradation"	04141 Protein processing in endoplasmic reticulum
Cluster_13839	"K01230,K05283,K11816"	Genetic Information Processing	"Folding, sorting and degradation"	04141 Protein processing in endoplasmic reticulum
Cluster_13840	"K01930,K02366,K01228"	Genetic Information Processing	"Folding, sorting and degradation"	04141 Protein processing in endoplasmic reticulum
Cluster_13871	"K09561,K10260,K08332,K01876"	Genetic Information Processing	"Folding, sorting and degradation"	04141 Protein processing in endoplasmic reticulum
Cluster_1390	"K13457,K07466,K02183,K05349,K14309,K16226,K08852,K16911,K01115,K04646,K13414,K03283,K16225"	Genetic Information Processing	"Folding, sorting and degradation"	04141 Protein processing in endoplasmic reticulum
Cluster_14133	K14026	Genetic Information Processing	"Folding, sorting and degradation"	04141 Protein processing in endoplasmic reticulum
Cluster_14231	"K13341,K14005,K15542"	Genetic Information Processing	"Folding, sorting and degradation"	04141 Protein processing in endoplasmic reticulum
Cluster_14366	K09562	Genetic Information Processing	"Folding, sorting and degradation"	04141 Protein processing in endoplasmic reticulum
Cluster_14382	K10661	Genetic Information Processing	"Folding, sorting and degradation"	04141 Protein processing in endoplasmic reticulum
Cluster_14426	K03283	Genetic Information Processing	"Folding, sorting and degradation"	04141 Protein processing in endoplasmic reticulum
Cluster_14516	"K03362,K14555,K10260,K14018,K16794"	Genetic Information Processing	"Folding, sorting and degradation"	04141 Protein processing in endoplasmic reticulum
Cluster_14543	K01228	Genetic Information Processing	"Folding, sorting and degradation"	04141 Protein processing in endoplasmic reticulum
Cluster_14682	"K10875,K10601,K14317"	Genetic Information Processing	"Folding, sorting and degradation"	04141 Protein processing in endoplasmic reticulum
Cluster_1472	"K05356,K05658,K01191,K03136,K13420,K07198,K12741,K01456,K12882,K03644,K04077,K01623,K17982,K04392,K14760,K07374,K01188,K12619,K00627,K01876,K02350"	Genetic Information Processing	"Folding, sorting and degradation"	04141 Protein processing in endoplasmic reticulum
Cluster_14791	"K09561,K10260,K08332,K01876"	Genetic Information Processing	"Folding, sorting and degradation"	04141 Protein processing in endoplasmic reticulum
Cluster_14826	K03283	Genetic Information Processing	"Folding, sorting and degradation"	04141 Protein processing in endoplasmic reticulum
Cluster_1491	"K16225,K03283,K13459,K08852,K13412,K16911,K14309,K13457"	Genetic Information Processing	"Folding, sorting and degradation"	04141 Protein processing in endoplasmic reticulum
Cluster_14930	"K01183,K13417,K13436,K13416,K03283"	Genetic Information Processing	"Folding, sorting and degradation"	04141 Protein processing in endoplasmic reticulum
Cluster_14936	"K14001,K10365"	Genetic Information Processing	"Folding, sorting and degradation"	04141 Protein processing in endoplasmic reticulum
Cluster_1499	"K13459,K16226,K08852,K13412,K16911,K03283,K16225,K02183,K13457"	Genetic Information Processing	"Folding, sorting and degradation"	04141 Protein processing in endoplasmic reticulum
Cluster_15038	K14015	Genetic Information Processing	"Folding, sorting and degradation"	04141 Protein processing in endoplasmic reticulum
Cluster_15062	K09518	Genetic Information Processing	"Folding, sorting and degradation"	04141 Protein processing in endoplasmic reticulum
Cluster_15096	"K14555,K10260,K03362,K16794,K12862,K14018"	Genetic Information Processing	"Folding, sorting and degradation"	04141 Protein processing in endoplasmic reticulum
Cluster_15139	"K09517,K09503"	Genetic Information Processing	"Folding, sorting and degradation"	04141 Protein processing in endoplasmic reticulum
Cluster_15169	K03237	Genetic Information Processing	"Folding, sorting and degradation"	04141 Protein processing in endoplasmic reticulum
Cluster_15203	"K03025,K10661"	Genetic Information Processing	"Folding, sorting and degradation"	04141 Protein processing in endoplasmic reticulum
Cluster_15210	K03283	Genetic Information Processing	"Folding, sorting and degradation"	04141 Protein processing in endoplasmic reticulum
Cluster_15224	"K04043,K03283"	Genetic Information Processing	"Folding, sorting and degradation"	04141 Protein processing in endoplasmic reticulum
Cluster_15249	K03094	Genetic Information Processing	"Folding, sorting and degradation"	04141 Protein processing in endoplasmic reticulum
Cluster_1529	K08653	Genetic Information Processing	"Folding, sorting and degradation"	04141 Protein processing in endoplasmic reticulum
Cluster_1533	K14018	Genetic Information Processing	"Folding, sorting and degradation"	04141 Protein processing in endoplasmic reticulum
Cluster_15423	"K10875,K10601"	Genetic Information Processing	"Folding, sorting and degradation"	04141 Protein processing in endoplasmic reticulum
Cluster_15431	"K12857,K12598,K14018"	Genetic Information Processing	"Folding, sorting and degradation"	04141 Protein processing in endoplasmic reticulum
Cluster_15463	K09503	Genetic Information Processing	"Folding, sorting and degradation"	04141 Protein processing in endoplasmic reticulum
Cluster_1547	K14005	Genetic Information Processing	"Folding, sorting and degradation"	04141 Protein processing in endoplasmic reticulum
Cluster_15525	"K01738,K01228,K02366"	Genetic Information Processing	"Folding, sorting and degradation"	04141 Protein processing in endoplasmic reticulum
Cluster_15621	K03094	Genetic Information Processing	"Folding, sorting and degradation"	04141 Protein processing in endoplasmic reticulum
Cluster_15793	"K14317,K05283,K10875,K01230"	Genetic Information Processing	"Folding, sorting and degradation"	04141 Protein processing in endoplasmic reticulum
Cluster_1586	"K14309,K13459,K08852,K16226,K16911,K03283,K16225"	Genetic Information Processing	"Folding, sorting and degradation"	04141 Protein processing in endoplasmic reticulum
Cluster_15878	"K09517,K09503"	Genetic Information Processing	"Folding, sorting and degradation"	04141 Protein processing in endoplasmic reticulum
Cluster_159	K13525	Genetic Information Processing	"Folding, sorting and degradation"	04141 Protein processing in endoplasmic reticulum
Cluster_15941	"K03283,K03136"	Genetic Information Processing	"Folding, sorting and degradation"	04141 Protein processing in endoplasmic reticulum
Cluster_15959	K12669	Genetic Information Processing	"Folding, sorting and degradation"	04141 Protein processing in endoplasmic reticulum
Cluster_16079	K03868	Genetic Information Processing	"Folding, sorting and degradation"	04141 Protein processing in endoplasmic reticulum
Cluster_16176	"K05349,K14309,K07466,K02183,K04646,K01115,K13414,K03283,K08852,K16226,K16911"	Genetic Information Processing	"Folding, sorting and degradation"	04141 Protein processing in endoplasmic reticulum
Cluster_16270	K10839	Genetic Information Processing	"Folding, sorting and degradation"	04141 Protein processing in endoplasmic reticulum
Cluster_16331	K12669	Genetic Information Processing	"Folding, sorting and degradation"	04141 Protein processing in endoplasmic reticulum
Cluster_16398	K14012	Genetic Information Processing	"Folding, sorting and degradation"	04141 Protein processing in endoplasmic reticulum
Cluster_16401	K03094	Genetic Information Processing	"Folding, sorting and degradation"	04141 Protein processing in endoplasmic reticulum
Cluster_16423	"K02320,K09486,K08288"	Genetic Information Processing	"Folding, sorting and degradation"	04141 Protein processing in endoplasmic reticulum
Cluster_16461	K03283	Genetic Information Processing	"Folding, sorting and degradation"	04141 Protein processing in endoplasmic reticulum
Cluster_16503	K14016	Genetic Information Processing	"Folding, sorting and degradation"	04141 Protein processing in endoplasmic reticulum
Cluster_1658	"K09584,K09503,K09517,K09523"	Genetic Information Processing	"Folding, sorting and degradation"	04141 Protein processing in endoplasmic reticulum
Cluster_16586	"K14297,K10601"	Genetic Information Processing	"Folding, sorting and degradation"	04141 Protein processing in endoplasmic reticulum
Cluster_16608	K09584	Genetic Information Processing	"Folding, sorting and degradation"	04141 Protein processing in endoplasmic reticulum
Cluster_16687	K10950	Genetic Information Processing	"Folding, sorting and degradation"	04141 Protein processing in endoplasmic reticulum
Cluster_16688	"K16166,K02259,K09584,K09422"	Genetic Information Processing	"Folding, sorting and degradation"	04141 Protein processing in endoplasmic reticulum
Cluster_16716	K10661	Genetic Information Processing	"Folding, sorting and degradation"	04141 Protein processing in endoplasmic reticulum
Cluster_16824	"K09523,K09518"	Genetic Information Processing	"Folding, sorting and degradation"	04141 Protein processing in endoplasmic reticulum
Cluster_16850	"K08852,K16226,K01115,K13414,K03283,K07466,K02183,K05349,K14309"	Genetic Information Processing	"Folding, sorting and degradation"	04141 Protein processing in endoplasmic reticulum
Cluster_16853	K14004	Genetic Information Processing	"Folding, sorting and degradation"	04141 Protein processing in endoplasmic reticulum
Cluster_16924	K12667	Genetic Information Processing	"Folding, sorting and degradation"	04141 Protein processing in endoplasmic reticulum
Cluster_16982	K03283	Genetic Information Processing	"Folding, sorting and degradation"	04141 Protein processing in endoplasmic reticulum
Cluster_17001	K11718	Genetic Information Processing	"Folding, sorting and degradation"	04141 Protein processing in endoplasmic reticulum
Cluster_17180	"K08852,K16226,K03283,K13414,K01115,K02183,K07466,K13448,K14309,K05349"	Genetic Information Processing	"Folding, sorting and degradation"	04141 Protein processing in endoplasmic reticulum
Cluster_17186	K13989	Genetic Information Processing	"Folding, sorting and degradation"	04141 Protein processing in endoplasmic reticulum
Cluster_17219	K09503	Genetic Information Processing	"Folding, sorting and degradation"	04141 Protein processing in endoplasmic reticulum
Cluster_17257	"K04708,K05283,K10875,K01230"	Genetic Information Processing	"Folding, sorting and degradation"	04141 Protein processing in endoplasmic reticulum
Cluster_17274	K03283	Genetic Information Processing	"Folding, sorting and degradation"	04141 Protein processing in endoplasmic reticulum
Cluster_17304	"K14317,K10601"	Genetic Information Processing	"Folding, sorting and degradation"	04141 Protein processing in endoplasmic reticulum
Cluster_17369	K03868	Genetic Information Processing	"Folding, sorting and degradation"	04141 Protein processing in endoplasmic reticulum
Cluster_17381	K10666	Genetic Information Processing	"Folding, sorting and degradation"	04141 Protein processing in endoplasmic reticulum
Cluster_17389	K09540	Genetic Information Processing	"Folding, sorting and degradation"	04141 Protein processing in endoplasmic reticulum
Cluster_17489	K10950	Genetic Information Processing	"Folding, sorting and degradation"	04141 Protein processing in endoplasmic reticulum
Cluster_17490	K10950	Genetic Information Processing	"Folding, sorting and degradation"	04141 Protein processing in endoplasmic reticulum
Cluster_17545	"K10601,K10875"	Genetic Information Processing	"Folding, sorting and degradation"	04141 Protein processing in endoplasmic reticulum
Cluster_17640	K09503	Genetic Information Processing	"Folding, sorting and degradation"	04141 Protein processing in endoplasmic reticulum
Cluster_17694	K10578	Genetic Information Processing	"Folding, sorting and degradation"	04141 Protein processing in endoplasmic reticulum
Cluster_1780	"K14416,K01191,K01456,K12598,K12741,K07198,K12619,K01623,K13436,K02350,K00627,K01209"	Genetic Information Processing	"Folding, sorting and degradation"	04141 Protein processing in endoplasmic reticulum
Cluster_17887	"K14317,K10601"	Genetic Information Processing	"Folding, sorting and degradation"	04141 Protein processing in endoplasmic reticulum
Cluster_17980	K03094	Genetic Information Processing	"Folding, sorting and degradation"	04141 Protein processing in endoplasmic reticulum
Cluster_18004	"K07466,K02183,K05349,K14309,K08852,K16226,K16911,K01115,K03283"	Genetic Information Processing	"Folding, sorting and degradation"	04141 Protein processing in endoplasmic reticulum
Cluster_18015	K03094	Genetic Information Processing	"Folding, sorting and degradation"	04141 Protein processing in endoplasmic reticulum
Cluster_18019	K03094	Genetic Information Processing	"Folding, sorting and degradation"	04141 Protein processing in endoplasmic reticulum
Cluster_18068	K11863	Genetic Information Processing	"Folding, sorting and degradation"	04141 Protein processing in endoplasmic reticulum
Cluster_18104	K14012	Genetic Information Processing	"Folding, sorting and degradation"	04141 Protein processing in endoplasmic reticulum
Cluster_18396	K04374	Genetic Information Processing	"Folding, sorting and degradation"	04141 Protein processing in endoplasmic reticulum
Cluster_18437	K14004	Genetic Information Processing	"Folding, sorting and degradation"	04141 Protein processing in endoplasmic reticulum
Cluster_18502	K09540	Genetic Information Processing	"Folding, sorting and degradation"	04141 Protein processing in endoplasmic reticulum
Cluster_18627	"K02183,K07466,K14309,K05349,K16226,K08852,K03283,K01115,K04646,K13414"	Genetic Information Processing	"Folding, sorting and degradation"	04141 Protein processing in endoplasmic reticulum
Cluster_18720	"K14005,K01895,K13341,K10143"	Genetic Information Processing	"Folding, sorting and degradation"	04141 Protein processing in endoplasmic reticulum
Cluster_18971	"K02936,K10601"	Genetic Information Processing	"Folding, sorting and degradation"	04141 Protein processing in endoplasmic reticulum
Cluster_18989	"K10601,K14317"	Genetic Information Processing	"Folding, sorting and degradation"	04141 Protein processing in endoplasmic reticulum
Cluster_18997	"K09517,K09503"	Genetic Information Processing	"Folding, sorting and degradation"	04141 Protein processing in endoplasmic reticulum
Cluster_1903	"K09580,K09584"	Genetic Information Processing	"Folding, sorting and degradation"	04141 Protein processing in endoplasmic reticulum
Cluster_19147	K14016	Genetic Information Processing	"Folding, sorting and degradation"	04141 Protein processing in endoplasmic reticulum
Cluster_19156	"K14018,K03070,K17890,K16794,K12862,K14558,K14555,K10260,K12857,K03362"	Genetic Information Processing	"Folding, sorting and degradation"	04141 Protein processing in endoplasmic reticulum
Cluster_19157	K10636	Genetic Information Processing	"Folding, sorting and degradation"	04141 Protein processing in endoplasmic reticulum
Cluster_19158	"K05349,K14309,K07466,K02183,K13414,K04646,K01115,K03283,K16226,K08852"	Genetic Information Processing	"Folding, sorting and degradation"	04141 Protein processing in endoplasmic reticulum
Cluster_19181	"K09517,K09503"	Genetic Information Processing	"Folding, sorting and degradation"	04141 Protein processing in endoplasmic reticulum
Cluster_19282	K08054	Genetic Information Processing	"Folding, sorting and degradation"	04141 Protein processing in endoplasmic reticulum
Cluster_19306	K03868	Genetic Information Processing	"Folding, sorting and degradation"	04141 Protein processing in endoplasmic reticulum
Cluster_19399	K03283	Genetic Information Processing	"Folding, sorting and degradation"	04141 Protein processing in endoplasmic reticulum
Cluster_19459	"K09518,K09503"	Genetic Information Processing	"Folding, sorting and degradation"	04141 Protein processing in endoplasmic reticulum
Cluster_195	"K17982,K14760,K03283,K01623,K12619,K01876,K01209,K02350,K01006,K01191,K03136,K14416,K00654,K05658,K07198,K12741,K13420,K12882,K14489,K04077,K14539,K01456,K00559"	Genetic Information Processing	"Folding, sorting and degradation"	04141 Protein processing in endoplasmic reticulum
Cluster_19505	K09487	Genetic Information Processing	"Folding, sorting and degradation"	04141 Protein processing in endoplasmic reticulum
Cluster_1952	"K02183,K13420,K13459,K08852,K16226,K03283,K16225"	Genetic Information Processing	"Folding, sorting and degradation"	04141 Protein processing in endoplasmic reticulum
Cluster_19728	K14004	Genetic Information Processing	"Folding, sorting and degradation"	04141 Protein processing in endoplasmic reticulum
Cluster_19803	K14012	Genetic Information Processing	"Folding, sorting and degradation"	04141 Protein processing in endoplasmic reticulum
Cluster_19827	K10956	Genetic Information Processing	"Folding, sorting and degradation"	04141 Protein processing in endoplasmic reticulum
Cluster_19833	"K02183,K07466,K14309,K05349,K16226,K08852,K03283,K01115,K04646,K13414"	Genetic Information Processing	"Folding, sorting and degradation"	04141 Protein processing in endoplasmic reticulum
Cluster_19912	K09561	Genetic Information Processing	"Folding, sorting and degradation"	04141 Protein processing in endoplasmic reticulum
Cluster_19927	"K05349,K14309,K07466,K02183,K04646,K01115,K13414,K03283,K08852,K16226"	Genetic Information Processing	"Folding, sorting and degradation"	04141 Protein processing in endoplasmic reticulum
Cluster_19981	"K14317,K10601"	Genetic Information Processing	"Folding, sorting and degradation"	04141 Protein processing in endoplasmic reticulum
Cluster_2011	"K09503,K09518"	Genetic Information Processing	"Folding, sorting and degradation"	04141 Protein processing in endoplasmic reticulum
Cluster_20309	K14009	Genetic Information Processing	"Folding, sorting and degradation"	04141 Protein processing in endoplasmic reticulum
Cluster_20343	"K10875,K01230,K11816,K05283,K10601"	Genetic Information Processing	"Folding, sorting and degradation"	04141 Protein processing in endoplasmic reticulum
Cluster_20350	K10661	Genetic Information Processing	"Folding, sorting and degradation"	04141 Protein processing in endoplasmic reticulum
Cluster_20381	"K05283,K14317,K10875,K01230"	Genetic Information Processing	"Folding, sorting and degradation"	04141 Protein processing in endoplasmic reticulum
Cluster_20401	K14006	Genetic Information Processing	"Folding, sorting and degradation"	04141 Protein processing in endoplasmic reticulum
Cluster_20591	K12667	Genetic Information Processing	"Folding, sorting and degradation"	04141 Protein processing in endoplasmic reticulum
Cluster_20724	"K16226,K08852,K01115,K04646,K13414,K03283,K07466,K02183,K05349,K14309"	Genetic Information Processing	"Folding, sorting and degradation"	04141 Protein processing in endoplasmic reticulum
Cluster_20745	K04079	Genetic Information Processing	"Folding, sorting and degradation"	04141 Protein processing in endoplasmic reticulum
Cluster_20748	"K05283,K14317,K10875,K01230"	Genetic Information Processing	"Folding, sorting and degradation"	04141 Protein processing in endoplasmic reticulum
Cluster_2077	"K03283,K16226,K02905"	Genetic Information Processing	"Folding, sorting and degradation"	04141 Protein processing in endoplasmic reticulum
Cluster_20817	"K11816,K05283,K10601,K04708"	Genetic Information Processing	"Folding, sorting and degradation"	04141 Protein processing in endoplasmic reticulum
Cluster_20830	"K09503,K09517"	Genetic Information Processing	"Folding, sorting and degradation"	04141 Protein processing in endoplasmic reticulum
Cluster_20914	"K03283,K01115,K04646,K13414,K08852,K16226,K14309,K05349,K02183,K07466"	Genetic Information Processing	"Folding, sorting and degradation"	04141 Protein processing in endoplasmic reticulum
Cluster_21	"K15086,K05605,K01191,K16196,K05666,K10599,K13457,K01689,K13356,K12819,K01738,K03062,K14513,K05756,K00566"	Genetic Information Processing	"Folding, sorting and degradation"	04141 Protein processing in endoplasmic reticulum
Cluster_21003	"K12795,K09561"	Genetic Information Processing	"Folding, sorting and degradation"	04141 Protein processing in endoplasmic reticulum
Cluster_21019	"K05605,K16196,K00566,K05756,K01738,K03062"	Genetic Information Processing	"Folding, sorting and degradation"	04141 Protein processing in endoplasmic reticulum
Cluster_2108	K06689	Genetic Information Processing	"Folding, sorting and degradation"	04141 Protein processing in endoplasmic reticulum
Cluster_21156	"K03283,K16225,K16226,K08852,K16911,K13459,K00514,K13457,K04706"	Genetic Information Processing	"Folding, sorting and degradation"	04141 Protein processing in endoplasmic reticulum
Cluster_21282	"K07466,K10661"	Genetic Information Processing	"Folding, sorting and degradation"	04141 Protein processing in endoplasmic reticulum
Cluster_21310	"K09517,K09503,K09540"	Genetic Information Processing	"Folding, sorting and degradation"	04141 Protein processing in endoplasmic reticulum
Cluster_21450	K09487	Genetic Information Processing	"Folding, sorting and degradation"	04141 Protein processing in endoplasmic reticulum
[truncated: 2,763,628 more chars]
