# Supplementary material for: Transcriptomic dynamics changes related to anthocyanin accumulation in the fleshy roots of carmine radish (Raphanus sativus L.) characterized using RNA-Seq
Source: PeerJ. 2021 Apr 7;9:e10978. doi: 10.7717/peerj.10978 (PMC8035900; doi:10.7717/peerj.10978)
Supplement: Supplemental Information 2 — qRT-PCR data for 11 selected DEGs related to anthocyanin biosythesis. [file peerj-09-10978-s002.xlsx]

## Sheet: Sheet1
sample	GENE_IDs	Rep1(log2(Fold change)	Rep2(log2(Fold change)	Rep3(log2(Fold change)
SS_root	UDP-glycosyltransferase 75C1-like	0.0270125	0.0411028	0.0127832
IE_root	UDP-glycosyltransferase 75C1-like	2.47393	2.39593	2.55639
FE_root	UDP-glycosyltransferase 75C1-like	4.42358	4.44029	4.40667
BS_root	UDP-glycosyltransferase 75C1-like	4.98823	5.01346	4.96255
IFS_root	UDP-glycosyltransferase 75C1-like	5.91767	5.97613	5.85674
FBS_root	UDP-glycosyltransferase 75C1-like	7.64155	7.68075	7.60125
PS_root	UDP-glycosyltransferase 75C1-like	6.78175	6.83958	6.72151
SS_root	UDP-glycosyltransferase 78D2-like	3.49697	3.51602	3.47768
IE_root	UDP-glycosyltransferase 78D2-like	4.41414	4.43162	4.39643
FE_root	UDP-glycosyltransferase 78D2-like	4.51033	4.52669	4.49378
BS_root	UDP-glycosyltransferase 78D2-like	5.20242	5.21994	5.18468
IFS_root	UDP-glycosyltransferase 78D2-like	5.81711	5.83618	5.79779
FBS_root	UDP-glycosyltransferase 78D2-like	8.24022	8.27557	8.20398
PS_root	UDP-glycosyltransferase 78D2-like	4.38128	4.39917	4.36317
SS_root	dihydroflavonol 4-reductase	0.621488	0.599462	0.643856
IE_root	dihydroflavonol 4-reductase	5.44062	5.46271	5.41819
FE_root	dihydroflavonol 4-reductase	9.42063	9.4529	9.38763
BS_root	dihydroflavonol 4-reductase	9.73256	9.77517	9.68865
IFS_root	dihydroflavonol 4-reductase	11.6135	11.6366	11.5901
FBS_root	dihydroflavonol 4-reductase	12.0173	12.0417	11.9926
PS_root	dihydroflavonol 4-reductase	10.4574	10.5456	10.3635
SS_root	flavonoid 3'-monooxygenase	0.910733	0.925999	0.895303
IE_root	flavonoid 3'-monooxygenase	2.67129	2.70708	2.63459
FE_root	flavonoid 3'-monooxygenase	4.66448	4.68426	4.64443
BS_root	flavonoid 3'-monooxygenase	5.30159	5.32121	5.2817
IFS_root	flavonoid 3'-monooxygenase	6.96659	6.97865	6.95443
FBS_root	flavonoid 3'-monooxygenase	7.96942	7.99509	7.94328
PS_root	flavonoid 3'-monooxygenase	6.7707	6.7845	6.75676
SS_root	leucoanthocyanidin dioxygenase	3.77505	3.77716	3.77294
IE_root	leucoanthocyanidin dioxygenase	4.41143	4.42761	4.39506
FE_root	leucoanthocyanidin dioxygenase	4.71589	4.7301	4.70155
BS_root	leucoanthocyanidin dioxygenase	4.9279	4.94251	4.91313
IFS_root	leucoanthocyanidin dioxygenase	5.06953	5.08364	5.05528
FBS_root	leucoanthocyanidin dioxygenase	5.5345	5.55182	5.51696
PS_root	leucoanthocyanidin dioxygenase	5.2709	5.28651	5.25512
SS_root	anthocyanidin 3-O-glucoside 2'''-O-xylosyltransferase	1.63749	1.65134	1.62352
IE_root	anthocyanidin 3-O-glucoside 2'''-O-xylosyltransferase	3.23955	3.24869	3.23036
FE_root	anthocyanidin 3-O-glucoside 2'''-O-xylosyltransferase	6.52074	6.57849	6.46058
BS_root	anthocyanidin 3-O-glucoside 2'''-O-xylosyltransferase	6.87344	6.93322	6.81109
IFS_root	anthocyanidin 3-O-glucoside 2'''-O-xylosyltransferase	7.36667	7.42316	7.30788
FBS_root	anthocyanidin 3-O-glucoside 2'''-O-xylosyltransferase	8.34789	8.38539	8.30939
PS_root	anthocyanidin 3-O-glucoside 2'''-O-xylosyltransferase	6.8431	6.88728	6.79753
SS_root	glutathione S-transferase F12	0.23	0.24	0.22
IE_root	glutathione S-transferase F12	6.10224	6.15522	6.04723
FE_root	glutathione S-transferase F12	7.62768	7.66789	7.58631
BS_root	glutathione S-transferase F12	7.73627	7.7654	7.70653
IFS_root	glutathione S-transferase F12	8.63764	8.65882	8.61614
FBS_root	glutathione S-transferase F12	9.41536	9.43417	9.39631
PS_root	glutathione S-transferase F12	8.15305	8.18597	8.11936
SS_root	coumaroyl-CoA:anthocyanidin 3-O-glucoside-6''-O-coumaroyltransferase 1-like	3.98914	4.09677	3.87283
IE_root	coumaroyl-CoA:anthocyanidin 3-O-glucoside-6''-O-coumaroyltransferase 1-like	5.7021	5.78947	5.6091
FE_root	coumaroyl-CoA:anthocyanidin 3-O-glucoside-6''-O-coumaroyltransferase 1-like	6.82413	6.88105	6.76487
BS_root	coumaroyl-CoA:anthocyanidin 3-O-glucoside-6''-O-coumaroyltransferase 1-like	6.96428	7.0197	6.90665
IFS_root	coumaroyl-CoA:anthocyanidin 3-O-glucoside-6''-O-coumaroyltransferase 1-like	9.34913	9.36886	9.32912
FBS_root	coumaroyl-CoA:anthocyanidin 3-O-glucoside-6''-O-coumaroyltransferase 1-like	9.9885	10.0103	9.96632
PS_root	coumaroyl-CoA:anthocyanidin 3-O-glucoside-6''-O-coumaroyltransferase 1-like	8.36479	8.38892	8.34025
SS_root	myb-like transcription factor 2	0	0.0143553	-0.0144996
IE_root	myb-like transcription factor 2	2.31904	2.33342	2.30451
FE_root	myb-like transcription factor 2	4.24336	4.35755	4.11936
BS_root	myb-like transcription factor 2	5.62702	5.75515	5.48639
IFS_root	myb-like transcription factor 2	6.54257	6.64386	6.43363
FBS_root	myb-like transcription factor 2	6.85835	6.95327	6.75676
PS_root	myb-like transcription factor 2	5.2426	5.36842	5.10476
SS_root	Zinc finger, RING-type protein	3.18903	3.27501	3.09761
IE_root	Zinc finger, RING-type protein	3.26754	3.33485	3.19692
FE_root	Zinc finger, RING-type protein	4.91648	5.02414	4.80012
BS_root	Zinc finger, RING-type protein	4.9607	5.11061	4.79338
IFS_root	Zinc finger, RING-type protein	5.17792	5.31615	5.02503
FBS_root	Zinc finger, RING-type protein	6.11582	6.22863	5.99345
PS_root	Zinc finger, RING-type protein	5.41988	5.55582	5.26978
SS_root	Chalcone synthase	0.61	0.63	0.59
IE_root	Chalcone synthase	4.34908	4.49889	4.1819
FE_root	Chalcone synthase	8.07649	8.14665	8.00276
BS_root	Chalcone synthase	9.07216	9.11322	9.02989
IFS_root	Chalcone synthase	9.97769	10.0277	9.9259
FBS_root	Chalcone synthase	10.6404	10.6819	10.5976
PS_root	Chalcone synthase	8.82187	8.89476	8.7451
